# Supplementary material for: Theoretical insights into the mechanism and origin of chemoselectivity in the catalyst- and directing group-dependent oxidative cyclization of diynes with pyridine N-oxides
Source: Royal Society of Chemistry journal article supplement (doi:10.1039/d2qo00996j), 2022-01-01
Supplement: d2qo00996j1.pdf [file d2qo00996j1.pdf]

## ***Supporting Information***

### **Theoretical Insights into the Mechanism and Origin of Chemoselectivity in the Catalyst- and Directing Group-Dependent Oxidative Cyclization of Diynes with Pyridine *N*-oxides**

Jia-Jie Chen,<sup>a</sup> Jia-Yi Liu,<sup>a</sup> Xi-Xi Cao,<sup>a</sup> Jing-Xin Hu,<sup>a</sup> Xin Lu,<sup>b</sup> Wen-Bo Shen,<sup>c</sup> Qing Sun,<sup>\*a</sup> Ren-Jie Song,<sup>\*a</sup> and Jin-Heng Li<sup>\*a,d</sup>

<sup>a</sup>Key Laboratory of Jiangxi Province for Persistent Pollutants Control and Resources Recycle, Nanchang Hangkong University, Nanchang 330063, China

<sup>b</sup>State Key Laboratory of Physical Chemistry of Solid Surface & Fujian Provincial Key Laboratory for Theoretical and Computational Chemistry, Department of Chemistry, College of Chemistry and Chemical Engineering, Xiamen University, Xiamen 361005, China

<sup>c</sup>College of Sciences, Henan Agricultural University, Zhengzhou, Henan 450002, China

<sup>d</sup>School of Chemistry and Chemical Engineering, Henan Normal University, Xinxiang, Henan 475004, China

***\*Correspondence:*** [sunqing@nchu.edu.cn](mailto:sunqing@nchu.edu.cn); [srj0731@hmu.edu.cn](mailto:srj0731@hmu.edu.cn); [jhli@hnu.edu.cn](mailto:jhli@hnu.edu.cn)

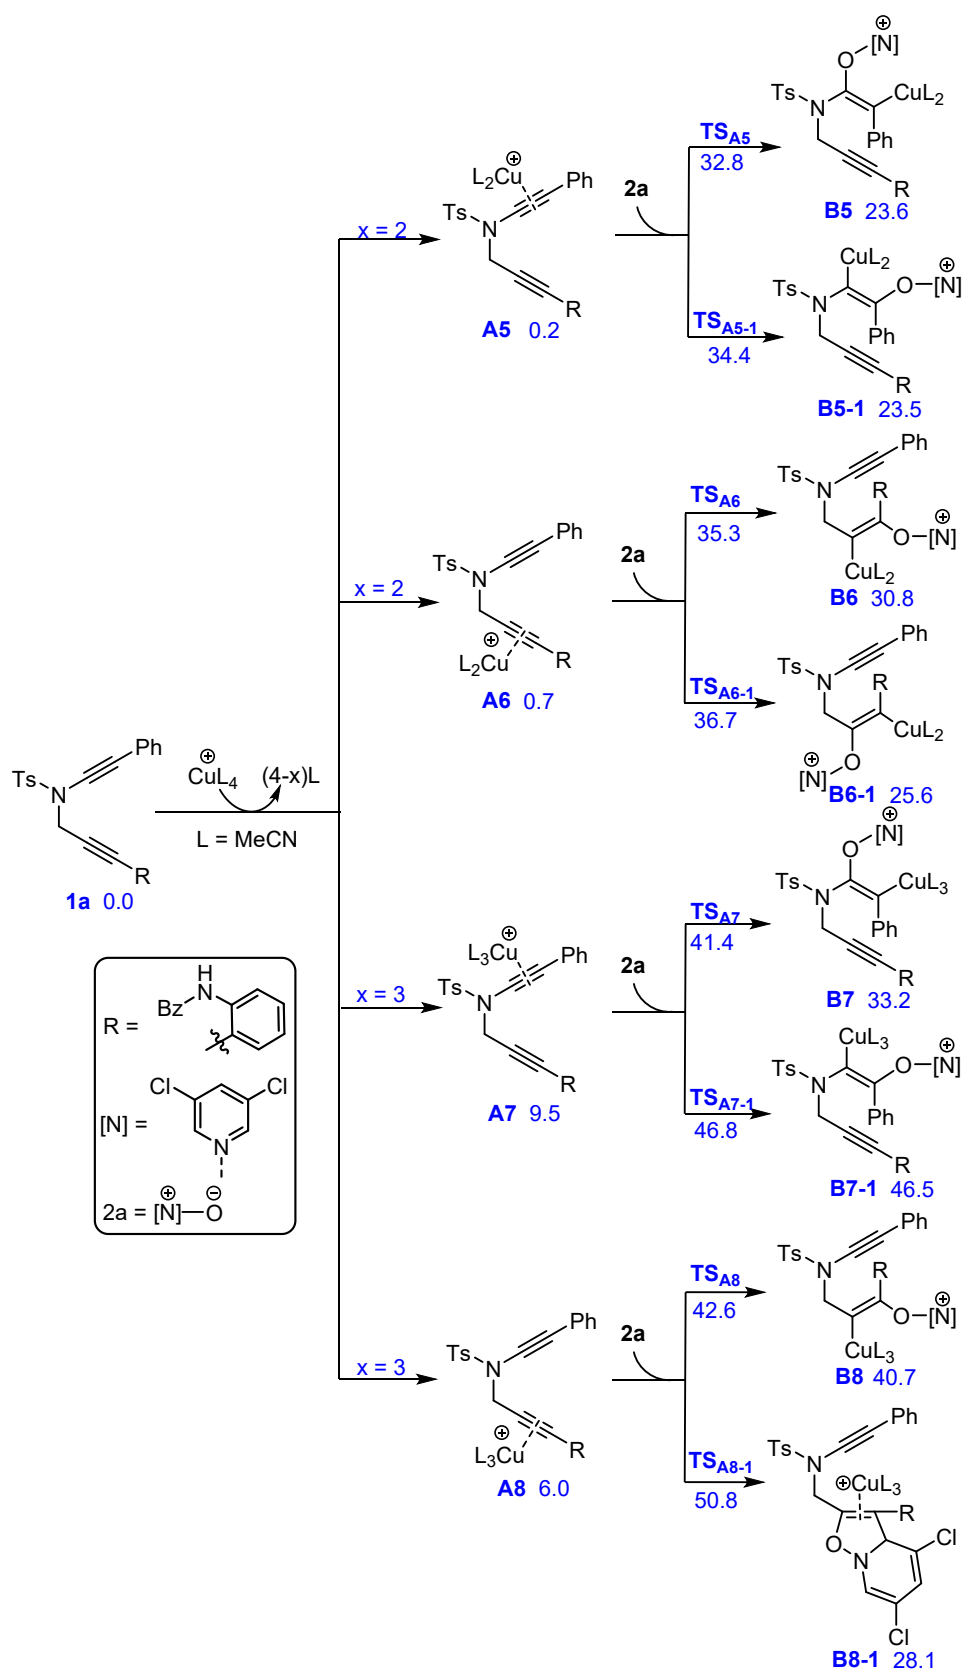

**Figure S1.** Relative free energies ( $\Delta G$ , in kcal/mol) of the Cu(I)-bound precursors with two or three L ligands (L = CH<sub>3</sub>CN), the transition states and intermediates of the nucleophilic attack of *N*-oxidant **2a** step.

**Cartesian Coordinates and Thermochemical Data (Energies in Hartree)**

**1a**

Number of imaginary frequencies: 0

|   |             |             |             |
|---|-------------|-------------|-------------|
| C | -0.71834500 | 1.76353600  | 0.56376100  |
| C | 0.18961400  | 2.12765400  | -0.15608700 |
| N | 1.20565900  | 2.48466700  | -0.97064600 |
| C | 1.33075300  | 1.70372800  | -2.23206100 |
| C | 1.27539700  | 0.26904300  | -1.98623400 |
| C | 1.17439400  | -0.87937500 | -1.60487500 |
| C | 0.94920900  | -2.20698100 | -1.14008000 |
| C | 2.00477300  | -3.11722200 | -1.01696800 |
| C | -0.36345800 | -2.59802000 | -0.77328900 |
| C | 1.77826000  | -4.40400800 | -0.55070800 |
| H | 3.00483400  | -2.79013500 | -1.29621400 |
| C | -0.58176600 | -3.89601000 | -0.30416100 |
| C | 0.48421000  | -4.78292300 | -0.20028000 |
| H | 2.60388400  | -5.10542000 | -0.45961200 |
| H | -1.58507300 | -4.19212000 | -0.02266300 |
| S | 2.68422600  | 2.88596100  | -0.16598700 |
| O | 2.28662900  | 3.69964500  | 0.96962800  |
| O | 3.54858600  | 3.41129200  | -1.21211300 |
| C | 3.32176000  | 1.33995700  | 0.39573400  |
| C | 2.78367000  | 0.76029600  | 1.54584900  |
| C | 4.26640100  | 0.67538700  | -0.38276500 |
| C | 3.20533900  | -0.51018600 | 1.90943500  |
| H | 2.05197400  | 1.29597300  | 2.14616900  |
| C | 4.67806800  | -0.59264500 | 0.00374300  |
| H | 4.66843100  | 1.14530100  | -1.27714400 |
| C | 4.15129900  | -1.20499100 | 1.14548300  |
| H | 2.79254000  | -0.97871800 | 2.80136200  |

|   |             |             |             |
|---|-------------|-------------|-------------|
| H | 5.41747900  | -1.12365300 | -0.59379700 |
| C | 4.59865400  | -2.57184200 | 1.55700100  |
| H | 5.00963500  | -3.13354300 | 0.71105700  |
| H | 5.38443200  | -2.50898100 | 2.32125400  |
| H | 3.77315700  | -3.14711400 | 1.99069000  |
| H | 0.50659900  | 2.02000300  | -2.88280500 |
| H | 2.25995000  | 2.01091200  | -2.72509400 |
| C | -1.71948300 | 1.24524100  | 1.43918800  |
| C | -2.87746500 | 1.97592000  | 1.73983200  |
| C | -1.54373400 | -0.03096400 | 1.99998700  |
| C | -3.83668100 | 1.44022800  | 2.59035800  |
| H | -3.01543200 | 2.95968300  | 1.29617600  |
| C | -2.50977400 | -0.56234900 | 2.84373500  |
| H | -0.64144300 | -0.59249600 | 1.75793100  |
| C | -3.65561500 | 0.17358200  | 3.14198000  |
| H | -4.73375400 | 2.01119500  | 2.81935700  |
| H | -2.36984200 | -1.55324800 | 3.26960500  |
| H | -4.41076100 | -0.24302900 | 3.80479600  |
| N | -1.36588700 | -1.63664600 | -0.90841500 |
| H | -1.02369300 | -0.70897900 | -1.14018200 |
| C | -2.71389000 | -1.74751100 | -0.67157800 |
| O | -3.24760100 | -2.75361900 | -0.22307500 |
| C | -3.49418000 | -0.51686900 | -1.00064600 |
| C | -4.73178100 | -0.35128700 | -0.37454300 |
| C | -3.04742400 | 0.45259900  | -1.90547400 |
| C | -5.49865100 | 0.77992500  | -0.62399800 |
| H | -5.07208900 | -1.11676600 | 0.31914800  |
| C | -3.81928300 | 1.58026900  | -2.15971600 |
| H | -2.10924900 | 0.32206200  | -2.44408000 |
| C | -5.04179900 | 1.74912500  | -1.51409100 |

|   |             |             |             |
|---|-------------|-------------|-------------|
| H | -6.45431000 | 0.90813100  | -0.12059100 |
| H | -3.46770300 | 2.32577100  | -2.86899100 |
| H | -5.64238100 | 2.63433100  | -1.71117300 |
| H | 0.29507100  | -5.78907300 | 0.16732400  |

**SMD-M06/6-31G(d,p)/SDD**

Electronic Energy (0K) = -1927.894051

Electronic Energy (0K) + ZPE = -1927.421460

Enthalpy (353K) = -1927.375949

Free Energy (353K) = -1927.506570

**SMD-M06/6-311++G(d,p)/SDD**

Electronic Energy (0K) = -1928.295309

**Cu(CH<sub>3</sub>CN)<sub>4</sub><sup>+</sup>**

Number of imaginary frequencies: 0

|   |             |             |             |
|---|-------------|-------------|-------------|
| N | -1.85665700 | 0.35173400  | 0.71008100  |
| N | 1.23643100  | -0.49166800 | 1.54700400  |
| N | 0.70580600  | 1.64610700  | -0.91978900 |
| C | -2.93318500 | 0.54871400  | 1.08653600  |
| C | 1.92706800  | -0.77325200 | 2.43194900  |
| C | 1.10903600  | 2.60195300  | -1.43281000 |
| C | 2.78769200  | -1.12234000 | 3.53576600  |
| C | -4.27567400 | 0.79285900  | 1.55517300  |
| C | 1.61106600  | 3.79447900  | -2.07099600 |
| H | 2.42230100  | -2.03392300 | 4.01764100  |
| H | 3.80610200  | -1.29145300 | 3.17407900  |
| H | 2.79816800  | -0.30992700 | 4.26850300  |
| H | -4.85314500 | -0.13575300 | 1.52718100  |
| H | -4.24802400 | 1.16648200  | 2.58285500  |
| H | -4.76199300 | 1.53625000  | 0.91669600  |
| H | 1.79769300  | 4.56666300  | -1.31898200 |

|    |             |             |             |
|----|-------------|-------------|-------------|
| H  | 2.54555700  | 3.57052000  | -2.59390800 |
| H  | 0.87752000  | 4.16701600  | -2.79188400 |
| Cu | 0.01041800  | -0.00790600 | 0.01760000  |
| C  | -0.09925800 | -3.47107100 | -3.04154500 |
| H  | -0.47724600 | -3.09839200 | -3.99797100 |
| H  | -0.74904700 | -4.27745800 | -2.68913800 |
| H  | 0.91217400  | -3.86272400 | -3.18424500 |
| C  | -0.07654300 | -2.40116500 | -2.07397400 |
| N  | -0.05717300 | -1.54255400 | -1.29816900 |

### **SMD-M06/6-31G(d,p)/SDD**

Electronic Energy (0K) = -728.001676

Electronic Energy (0K) + ZPE = -727.815870

Enthalpy (353K) = -727.787872

Free Energy (353K) = -727.887500

### **SMD-M06/6-311++G(d,p)/SDD**

Electronic Energy (0K) = -728.134954

### **CH<sub>3</sub>CN**

Number of imaginary frequencies: 0

|   |             |             |             |
|---|-------------|-------------|-------------|
| N | 1.43504300  | -0.00002600 | 0.00000700  |
| C | 0.27382000  | 0.00004800  | -0.00000100 |
| C | -1.17338400 | -0.00002600 | -0.00000800 |
| H | -1.54937500 | 0.22688600  | 1.00192900  |
| H | -1.54921600 | 0.75440900  | -0.69740800 |
| H | -1.54933100 | -0.98124300 | -0.30451900 |

### **SMD-M06/6-31G(d,p)/SDD**

Electronic Energy (0K) = -132.665022

Electronic Energy (0K) + ZPE = -132.619896

Enthalpy (353K) = -132.614265

Free Energy (353K) = -132.647986

**SMD-M06/6-311++G(d,p)/SDD**

Electronic Energy (0K) = -132.703132

**A**

Number of imaginary frequencies: 0

|   |             |             |             |
|---|-------------|-------------|-------------|
| C | -0.17532200 | 2.53060900  | -1.17896100 |
| C | 0.79858500  | 2.03945900  | -1.71736500 |
| N | 1.90864500  | 1.49890400  | -2.25842100 |
| C | 1.76950300  | 0.16458700  | -2.85732200 |
| C | 1.41137300  | -0.89039900 | -1.89153000 |
| C | 1.26836100  | -1.97772100 | -1.32284200 |
| C | 1.16009000  | -3.23930200 | -0.66633100 |
| C | 2.31785800  | -3.96486800 | -0.34644300 |
| C | -0.11090200 | -3.73843800 | -0.30483000 |
| C | 2.21568900  | -5.16252200 | 0.34206500  |
| H | 3.28660300  | -3.56875700 | -0.64258100 |
| C | -0.19796200 | -4.93879500 | 0.39481500  |
| C | 0.95919100  | -5.63850500 | 0.71612100  |
| H | 3.11165900  | -5.72489300 | 0.58986700  |
| H | -1.17405800 | -5.32181600 | 0.67361000  |
| S | 3.37132400  | 1.85015400  | -1.38520800 |
| O | 3.44298500  | 3.29951200  | -1.35581100 |
| O | 4.38553100  | 1.04206200  | -2.04298800 |
| C | 3.09863400  | 1.25605800  | 0.25631300  |
| C | 2.49459000  | 2.09630300  | 1.19328700  |
| C | 3.46340800  | -0.05058900 | 0.57817600  |
| C | 2.24212800  | 1.60249900  | 2.46523500  |
| H | 2.24215300  | 3.12139600  | 0.93359100  |
| C | 3.20197300  | -0.52317300 | 1.85788000  |
| H | 3.96154800  | -0.67939400 | -0.15641500 |

|   |             |             |             |
|---|-------------|-------------|-------------|
| C | 2.57999700  | 0.28911800  | 2.81294900  |
| H | 1.77763700  | 2.24821300  | 3.20910400  |
| H | 3.49432400  | -1.53695000 | 2.12678300  |
| C | 2.26154500  | -0.23803300 | 4.17535500  |
| H | 2.90124600  | -1.08596500 | 4.43956200  |
| H | 2.37214200  | 0.53730600  | 4.94089100  |
| H | 1.22116700  | -0.58831900 | 4.21800100  |
| H | 0.99930100  | 0.24058300  | -3.63345500 |
| H | 2.71257400  | -0.09198100 | -3.35027400 |
| C | -1.27372900 | 3.14178300  | -0.50881600 |
| C | -2.53456600 | 2.52505600  | -0.47115200 |
| C | -1.08305700 | 4.36408100  | 0.15504500  |
| C | -3.58391700 | 3.13444700  | 0.20510200  |
| H | -2.68461200 | 1.57082000  | -0.97768000 |
| C | -2.13729400 | 4.95703700  | 0.83833300  |
| H | -0.10625800 | 4.84230500  | 0.12077900  |
| C | -3.39008900 | 4.34791300  | 0.86269400  |
| H | -4.55983800 | 2.65270500  | 0.22197900  |
| H | -1.98086800 | 5.90480900  | 1.34807700  |
| H | -4.21510900 | 4.81913500  | 1.39154100  |
| N | -1.24873200 | -3.00426700 | -0.67147800 |
| H | -1.16556200 | -2.46402500 | -1.52496200 |
| C | -2.27085900 | -2.67995300 | 0.19700400  |
| O | -2.32192100 | -3.12203200 | 1.33453500  |
| C | -3.28883900 | -1.72339800 | -0.33090900 |
| C | -4.15942700 | -1.15529300 | 0.60426700  |
| C | -3.40900200 | -1.37064800 | -1.67971100 |
| C | -5.12376200 | -0.23982100 | 0.20420300  |
| H | -4.06554400 | -1.45111700 | 1.64672300  |
| C | -4.37797700 | -0.45570600 | -2.07973000 |



|    |             |             |             |
|----|-------------|-------------|-------------|
| H  | -2.78099000 | -1.82739700 | -2.44242400 |
| C  | -5.23330800 | 0.11340400  | -1.13977700 |
| H  | -5.79674500 | 0.19562100  | 0.93996700  |
| H  | -4.47157100 | -0.19604400 | -3.13127800 |
| H  | -5.99046600 | 0.82738300  | -1.45622000 |
| H  | 0.87635900  | -6.57819700 | 1.25657300  |
| Cu | 0.34397100  | -0.42211000 | -0.22281000 |
| C  | -2.27891700 | 1.30133700  | 2.96388400  |
| H  | -2.16410100 | 2.38820700  | 2.88525200  |
| H  | -2.01298500 | 0.97763400  | 3.97496400  |
| H  | -3.32123200 | 1.03419700  | 2.75882100  |
| C  | -1.41810600 | 0.66149700  | 2.00421900  |
| N  | -0.71980200 | 0.15442000  | 1.23401200  |

**SMD-M06/6-31G(d,p)/SDD**

Electronic Energy (0K) = -2257.873704

Electronic Energy (0K) + ZPE = -2257.352492

Enthalpy (353K) = -2257.298856

Free Energy (353K) = -2257.446058

**SMD-M06/6-311++G(d,p)/SDD**

Electronic Energy (0K) = -2258.296426

**2a** (*Cu catalysis system*)

Number of imaginary frequencies: 0

|   |             |             |             |
|---|-------------|-------------|-------------|
| C | 1.17599500  | -0.33676200 | 0.00093400  |
| C | -0.00005700 | -1.07494200 | 0.00073000  |
| C | -1.17611900 | -0.33655900 | 0.00074800  |
| C | -1.17992300 | 1.04400700  | -0.00006600 |
| C | 1.17995500  | 1.04391700  | 0.00012600  |
| H | -0.00023100 | -2.16018500 | 0.00081500  |
| H | 2.07358300  | 1.65700500  | -0.00042800 |

|    |             |             |             |
|----|-------------|-------------|-------------|
| N  | 0.00015100  | 1.73498900  | -0.00016300 |
| O  | 0.00019200  | 3.00046200  | -0.00006800 |
| H  | -2.07334000 | 1.65740600  | -0.00065100 |
| Cl | -2.70832600 | -1.15700400 | -0.00034500 |
| Cl | 2.70822600  | -1.15716100 | -0.00041300 |

**SMD-M06/6-31G(d,p)/SDD**

Electronic Energy (0K) = -1242.358890

Electronic Energy (0K) + ZPE = -1242.285416

Enthalpy (353K) = -1242.274254

Free Energy (353K) = -1242.325673

**SMD-M06/6-311++G(d,p)/SDD**

Electronic Energy (0K) = -1242.501470

**TS<sub>A</sub>**

Number of imaginary frequencies: 1

|   |             |             |             |
|---|-------------|-------------|-------------|
| C | 1.74441300  | -1.97331700 | -1.54222900 |
| C | 0.54246900  | -1.78588300 | -1.53192700 |
| N | -0.79361700 | -1.62168800 | -1.47590200 |
| C | -1.31075600 | -0.23526900 | -1.45502100 |
| C | -0.83036400 | 0.56915900  | -0.29465800 |
| C | -1.24247100 | 1.58551400  | 0.37541100  |
| C | -0.88400300 | 2.53474800  | 1.41092800  |
| C | -1.69305800 | 2.68731100  | 2.54465100  |
| C | 0.31266000  | 3.28176900  | 1.31602100  |
| C | -1.31946700 | 3.52809900  | 3.58015700  |
| H | -2.62225100 | 2.12590300  | 2.60436800  |
| C | 0.67927400  | 4.13165900  | 2.36134900  |
| C | -0.12901700 | 4.24678900  | 3.48396400  |
| H | -1.95425500 | 3.62817900  | 4.45654900  |
| H | 1.59719800  | 4.70274900  | 2.27812700  |

|   |             |             |             |
|---|-------------|-------------|-------------|
| S | -1.59788000 | -2.78982800 | -0.47850900 |
| O | -1.23638300 | -4.08054300 | -1.03731500 |
| O | -2.98225900 | -2.34124300 | -0.42970300 |
| C | -0.85383900 | -2.62421100 | 1.11394800  |
| C | 0.29609900  | -3.35817200 | 1.40292600  |
| C | -1.36765700 | -1.69253600 | 2.01449900  |
| C | 0.94087900  | -3.13996300 | 2.61278600  |
| H | 0.66788500  | -4.09726100 | 0.69755900  |
| C | -0.70867800 | -1.49041700 | 3.21965000  |
| H | -2.27868800 | -1.14671200 | 1.77665800  |
| C | 0.45869700  | -2.19863800 | 3.52950700  |
| H | 1.83517100  | -3.71189000 | 2.85558400  |
| H | -1.10589700 | -0.77464500 | 3.93768300  |
| C | 1.19354500  | -1.93634000 | 4.80508000  |
| H | 0.52178500  | -1.57527600 | 5.59057000  |
| H | 1.70561500  | -2.83437700 | 5.16607800  |
| H | 1.95975000  | -1.16394900 | 4.65256600  |
| H | -0.96591200 | 0.22809400  | -2.38864400 |
| H | -2.39780800 | -0.32313100 | -1.52186700 |
| C | 3.14965000  | -2.19966700 | -1.49455000 |
| C | 4.04800300  | -1.19730800 | -1.89289200 |
| C | 3.64933100  | -3.41703200 | -1.00583800 |
| C | 5.41690900  | -1.41745500 | -1.81361100 |
| H | 3.66163900  | -0.25203200 | -2.27213900 |
| C | 5.02123300  | -3.62517600 | -0.92919600 |
| H | 2.95371300  | -4.19576300 | -0.69967700 |
| C | 5.90922400  | -2.62963500 | -1.33296600 |
| H | 6.10309700  | -0.63473100 | -2.13168600 |
| H | 5.39906300  | -4.57430400 | -0.55601800 |
| H | 6.98178300  | -2.79984000 | -1.27606000 |

|    |             |             |             |
|----|-------------|-------------|-------------|
| N  | 1.10389400  | 3.15664800  | 0.16464100  |
| H  | 0.60606600  | 2.86749200  | -0.66801000 |
| C  | 2.47597400  | 3.05570800  | 0.15128000  |
| O  | 3.15910300  | 3.23652100  | 1.14958700  |
| C  | 3.09160500  | 2.70274200  | -1.16661900 |
| C  | 4.48879400  | 2.68101700  | -1.21577200 |
| C  | 2.36666100  | 2.39110400  | -2.32339300 |
| C  | 5.15106100  | 2.37075600  | -2.39642700 |
| H  | 5.04117500  | 2.92501700  | -0.31174500 |
| C  | 3.03033700  | 2.07730900  | -3.50475100 |
| H  | 1.27769500  | 2.39185100  | -2.33545600 |
| C  | 4.42251000  | 2.06895100  | -3.54483900 |
| H  | 6.23841500  | 2.36812600  | -2.42306200 |
| H  | 2.45684400  | 1.84034000  | -4.39748200 |
| H  | 4.93851900  | 1.82685800  | -4.47109100 |
| H  | 0.16848900  | 4.91782100  | 4.28615900  |
| Cu | 0.89747300  | 0.15972800  | 0.50050700  |
| C  | 5.10230500  | -0.66296000 | 1.74117700  |
| H  | 5.37984500  | -1.62132500 | 1.28730800  |
| H  | 5.25604300  | -0.71133500 | 2.82331400  |
| H  | 5.73168500  | 0.12825200  | 1.32126800  |
| C  | 3.72025500  | -0.38079800 | 1.45190800  |
| N  | 2.61107900  | -0.15603800 | 1.21257900  |
| C  | -5.27923700 | 0.67729500  | -2.14933600 |
| C  | -5.76916500 | -0.30041800 | -1.29068800 |
| C  | -5.26446000 | -0.32198700 | 0.00268600  |
| C  | -4.30035900 | 0.58292300  | 0.40977100  |
| C  | -4.30813600 | 1.57174400  | -1.73875200 |
| H  | -6.52099000 | -1.01334600 | -1.61607900 |
| H  | -3.87357400 | 2.34667400  | -2.36020100 |

|    |             |             |             |
|----|-------------|-------------|-------------|
| N  | -3.83289000 | 1.49285500  | -0.47399500 |
| O  | -2.90605000 | 2.34684900  | -0.10260800 |
| H  | -3.87583500 | 0.61720200  | 1.40760500  |
| Cl | -5.83225300 | -1.48436000 | 1.14556300  |
| Cl | -5.87061800 | 0.78911900  | -3.77068500 |

**SMD-M06/6-31G(d,p)/SDD**

Electronic Energy (0K) = -3500.227311

Electronic Energy (0K) + ZPE = -3499.631489

Enthalpy (353K) = -3499.566430

Free Energy (353K) = -3499.741676

**SMD-M06/6-311++G(d,p)/SDD**

Electronic Energy (0K) = -3500.787913

**B**

Number of imaginary frequencies: 0

|   |             |             |             |
|---|-------------|-------------|-------------|
| C | 1.97653800  | -2.05137200 | -1.46941400 |
| C | 0.78326800  | -1.82097900 | -1.51180400 |
| N | -0.54888500 | -1.63949000 | -1.48143400 |
| C | -1.09660900 | -0.27944500 | -1.69670400 |
| C | -0.78522200 | 0.70802200  | -0.60731300 |
| C | -1.59304400 | 1.75310200  | -0.37787300 |
| C | -1.41894000 | 2.91836200  | 0.51476800  |
| C | -2.50872600 | 3.40531900  | 1.25011100  |
| C | -0.18576600 | 3.60246500  | 0.63332000  |
| C | -2.38326700 | 4.46667500  | 2.13377900  |
| H | -3.48578300 | 2.94183100  | 1.12930200  |
| C | -0.06303600 | 4.67369500  | 1.52315000  |
| C | -1.14827400 | 5.09085100  | 2.28004000  |
| H | -3.24674500 | 4.80674800  | 2.69976100  |
| H | 0.89097600  | 5.18290700  | 1.59903200  |

|   |             |             |             |
|---|-------------|-------------|-------------|
| S | -1.37466500 | -2.69782300 | -0.39792300 |
| O | -1.14123600 | -4.04016800 | -0.90379200 |
| O | -2.72483400 | -2.15284200 | -0.30548200 |
| C | -0.54532000 | -2.53079100 | 1.15319100  |
| C | 0.59677600  | -3.29206300 | 1.39146800  |
| C | -0.98000100 | -1.56897700 | 2.06596400  |
| C | 1.32197400  | -3.06629700 | 2.55508300  |
| H | 0.91308200  | -4.04890000 | 0.67814000  |
| C | -0.25207700 | -1.37153000 | 3.22960100  |
| H | -1.88060100 | -0.99277900 | 1.86908100  |
| C | 0.91624800  | -2.10228100 | 3.48182000  |
| H | 2.22269400  | -3.64804800 | 2.74653600  |
| H | -0.58545000 | -0.63047700 | 3.95445500  |
| C | 1.71536300  | -1.83564300 | 4.71747500  |
| H | 1.14021000  | -2.07714100 | 5.61995700  |
| H | 2.63790100  | -2.42468700 | 4.73654100  |
| H | 1.98110100  | -0.77315900 | 4.78745700  |
| H | -0.62302100 | 0.06876900  | -2.62614300 |
| H | -2.15545000 | -0.42595300 | -1.92953700 |
| C | 3.37039100  | -2.30514500 | -1.33264800 |
| C | 4.29844600  | -1.25742800 | -1.44232600 |
| C | 3.82856900  | -3.60076500 | -1.04491000 |
| C | 5.65510900  | -1.50809600 | -1.28207000 |
| H | 3.94443600  | -0.25084200 | -1.66144900 |
| C | 5.18696900  | -3.83692800 | -0.87229700 |
| H | 3.11174800  | -4.41588000 | -0.96741400 |
| C | 6.10478100  | -2.79531500 | -0.99297200 |
| H | 6.36466700  | -0.68794900 | -1.38000800 |
| H | 5.53162800  | -4.84444900 | -0.65064600 |
| H | 7.16754700  | -2.98736500 | -0.86543000 |

|    |             |             |             |
|----|-------------|-------------|-------------|
| N  | 0.88073300  | 3.25284300  | -0.21068600 |
| H  | 0.61384500  | 2.68467600  | -1.00661700 |
| C  | 2.21722200  | 3.29444500  | 0.09884600  |
| O  | 2.64279400  | 3.70406000  | 1.17183600  |
| C  | 3.14103100  | 2.79269200  | -0.96665000 |
| C  | 4.48374800  | 2.63479800  | -0.60870400 |
| C  | 2.74831800  | 2.50445100  | -2.27927900 |
| C  | 5.41749300  | 2.19763100  | -1.53902200 |
| H  | 4.77801200  | 2.87488000  | 0.41026900  |
| C  | 3.68471200  | 2.06693600  | -3.21085700 |
| H  | 1.72039300  | 2.65020300  | -2.60792600 |
| C  | 5.01910100  | 1.91301800  | -2.84387700 |
| H  | 6.46004300  | 2.08459300  | -1.24920300 |
| H  | 3.37100100  | 1.85512900  | -4.23007800 |
| H  | 5.74836400  | 1.57041900  | -3.57472400 |
| H  | -1.03207100 | 5.92661700  | 2.96588800  |
| Cu | 0.81777100  | 0.42756600  | 0.41156400  |
| C  | 4.78026700  | -0.69941400 | 2.12410100  |
| H  | 4.89282600  | -1.76856900 | 1.91178300  |
| H  | 4.87027700  | -0.52988600 | 3.20144400  |
| H  | 5.56800100  | -0.14430900 | 1.60366500  |
| C  | 3.49088900  | -0.25469500 | 1.66100200  |
| N  | 2.45595100  | 0.09408900  | 1.27907600  |
| C  | -5.65492100 | -0.09776000 | -1.88656700 |
| C  | -5.90872200 | -0.73959900 | -0.67858100 |
| C  | -5.06893800 | -0.46325900 | 0.39005300  |
| C  | -4.00951900 | 0.41980100  | 0.25688300  |
| C  | -4.59112000 | 0.77550800  | -2.01476100 |
| H  | -6.73590500 | -1.43629500 | -0.57488000 |
| H  | -4.32477900 | 1.30662200  | -2.92281600 |

|    |             |             |             |
|----|-------------|-------------|-------------|
| N  | -3.81551400 | 0.99886600  | -0.93759300 |
| O  | -2.83532000 | 1.92964300  | -1.14223600 |
| H  | -3.31659600 | 0.66098300  | 1.05706900  |
| Cl | -5.30896100 | -1.22504100 | 1.91533500  |
| Cl | -6.65609600 | -0.38462600 | -3.25967700 |

**SMD-M06/6-31G(d,p)/SDD**

Electronic Energy (0K) = -3500.240403

Electronic Energy (0K) + ZPE = -3499.641639

Enthalpy (353K) = -3499.577354

Free Energy (353K) = -3499.748079

**SMD-M06/6-311++G(d,p)/SDD**

Electronic Energy (0K) = -3500.798324

**A1**

Number of imaginary frequencies: 0

|   |             |             |             |
|---|-------------|-------------|-------------|
| C | 0.70235500  | -2.39007300 | -0.48207500 |
| C | -0.04871100 | -1.95057400 | -1.33542000 |
| N | -0.83579200 | -1.43159800 | -2.29779400 |
| C | -0.60992300 | -0.01140400 | -2.60833800 |
| C | -0.65056000 | 0.85962200  | -1.41835500 |
| C | -0.69392300 | 1.83286100  | -0.66288100 |
| C | -0.67102300 | 2.98142800  | 0.18299300  |
| C | -1.85953700 | 3.46200300  | 0.75141700  |
| C | 0.54178000  | 3.65585600  | 0.43477300  |
| C | -1.85029000 | 4.60673900  | 1.53311600  |
| H | -2.78544100 | 2.92572700  | 0.55085300  |
| C | 0.53517600  | 4.81165100  | 1.20793200  |
| C | -0.65321000 | 5.28577300  | 1.75262800  |
| H | -2.77711400 | 4.97403800  | 1.96588100  |
| H | 1.47479400  | 5.33011800  | 1.38497800  |



|   |             |             |             |
|---|-------------|-------------|-------------|
| S | -2.48369500 | -1.98036200 | -2.33858800 |
| O | -2.41281500 | -3.37550500 | -1.94454500 |
| O | -2.97008000 | -1.57121800 | -3.64532100 |
| C | -3.29752300 | -1.03376200 | -1.09312900 |
| C | -3.13335100 | -1.39467200 | 0.24642400  |
| C | -4.00006200 | 0.11135300  | -1.46013700 |
| C | -3.68790000 | -0.58387300 | 1.22570800  |
| H | -2.59138400 | -2.29918900 | 0.51485700  |
| C | -4.54987900 | 0.90569600  | -0.46200400 |
| H | -4.11605500 | 0.37211600  | -2.50929300 |
| C | -4.39640500 | 0.57709500  | 0.88885500  |
| H | -3.56985400 | -0.85085000 | 2.27495600  |
| H | -5.10813900 | 1.80027700  | -0.73304800 |
| C | -4.97538200 | 1.44156200  | 1.96360800  |
| H | -5.39180600 | 2.36838900  | 1.55604000  |
| H | -5.77750600 | 0.91707300  | 2.49763900  |
| H | -4.21472300 | 1.70248000  | 2.70988400  |
| H | 0.37788600  | 0.07310400  | -3.07743100 |
| H | -1.35033300 | 0.30243900  | -3.35292500 |
| C | 1.56464800  | -3.00857600 | 0.47247700  |
| C | 2.46199500  | -2.24437600 | 1.23595900  |
| C | 1.50144800  | -4.39799300 | 0.66170800  |
| C | 3.28473800  | -2.86950000 | 2.16464500  |
| H | 2.49976700  | -1.16413600 | 1.09513100  |
| C | 2.32181900  | -5.00888500 | 1.60145300  |
| H | 0.80602300  | -4.98582400 | 0.06652500  |
| C | 3.21608000  | -4.24876800 | 2.35231900  |
| H | 3.98275800  | -2.27410400 | 2.74894500  |
| H | 2.26621800  | -6.08553200 | 1.74393200  |
| H | 3.86065100  | -4.73164400 | 3.08309800  |

|    |             |             |             |
|----|-------------|-------------|-------------|
| N  | 1.75438900  | 3.21319600  | -0.14517700 |
| H  | 2.25930100  | 3.88667700  | -0.71121100 |
| C  | 2.29208800  | 1.97323600  | 0.02022000  |
| O  | 1.77432300  | 1.11779300  | 0.74517000  |
| C  | 3.52386600  | 1.68252500  | -0.75886500 |
| C  | 3.67552500  | 0.38392000  | -1.25472100 |
| C  | 4.51648300  | 2.63729800  | -0.99683200 |
| C  | 4.79927200  | 0.04947500  | -1.99928400 |
| H  | 2.89700200  | -0.35370800 | -1.06217200 |
| C  | 5.64866100  | 2.29221000  | -1.72615000 |
| H  | 4.42782100  | 3.64274500  | -0.58783800 |
| C  | 5.78800300  | 1.00257600  | -2.23249900 |
| H  | 4.90620200  | -0.95743400 | -2.39537700 |
| H  | 6.42708100  | 3.03198600  | -1.89574300 |
| H  | 6.67229500  | 0.73823200  | -2.80768300 |
| H  | -0.64157000 | 6.18734100  | 2.35967200  |
| Cu | -0.29553600 | 0.04108500  | 0.44265000  |
| C  | 0.12752200  | -2.21651400 | 4.30159200  |
| H  | 0.23586900  | -3.26261700 | 3.99673000  |
| H  | -0.70376300 | -2.13166200 | 5.00770300  |
| H  | 1.04997800  | -1.88538600 | 4.78835400  |
| C  | -0.12437200 | -1.40423500 | 3.13890500  |
| N  | -0.30919200 | -0.76487500 | 2.19288700  |

**SMD-M06/6-31G(d,p)/SDD**

Electronic Energy (0K) = -2257.873805

Electronic Energy (0K) + ZPE = -2257.352650

Enthalpy (353K) = -2257.298988

Free Energy (353K) = -2257.446283

**SMD-M06/6-311++G(d,p)/SDD**

Electronic Energy (0K) = -2258.294328

**TS<sub>A1</sub>**

Number of imaginary frequencies: 1

|   |             |             |             |
|---|-------------|-------------|-------------|
| C | 2.18358700  | 0.71544900  | -2.16352600 |
| C | 1.12218200  | 0.12359700  | -2.23063800 |
| N | -0.09697100 | -0.44453200 | -2.25263600 |
| C | -0.99903900 | -0.09554100 | -1.12875900 |
| C | -0.41269500 | -0.36206800 | 0.21520800  |
| C | -0.78084900 | -0.42053200 | 1.44517800  |
| C | -0.24291200 | -0.56217500 | 2.79395700  |
| C | 0.06556100  | -1.81711500 | 3.32447800  |
| C | -0.01472900 | 0.58797800  | 3.56810900  |
| C | 0.60734500  | -1.92242100 | 4.60072900  |
| H | -0.11842300 | -2.70490300 | 2.71999100  |
| C | 0.52263100  | 0.47891900  | 4.84294700  |
| C | 0.83493200  | -0.77686800 | 5.35909800  |
| H | 0.84916800  | -2.90284100 | 5.00472300  |
| H | 0.69604200  | 1.38330500  | 5.42142600  |
| S | -0.20380500 | -2.05168100 | -2.86758900 |
| O | 0.78389900  | -2.11497000 | -3.93067300 |
| O | -1.62096700 | -2.25731700 | -3.12614700 |
| C | 0.28987500  | -3.07774700 | -1.52003300 |
| C | 1.64621800  | -3.16309500 | -1.19842000 |
| C | -0.68536400 | -3.68012900 | -0.73034600 |
| C | 2.01819900  | -3.86555700 | -0.06163400 |
| H | 2.39670600  | -2.69369900 | -1.83130900 |
| C | -0.28984000 | -4.38237900 | 0.40143300  |
| H | -1.73528800 | -3.60441900 | -1.00471200 |
| C | 1.05945900  | -4.47642100 | 0.75689200  |
| H | 3.07191600  | -3.94003900 | 0.20362100  |

|   |             |             |             |
|---|-------------|-------------|-------------|
| H | -1.04072300 | -4.86493700 | 1.02517200  |
| C | 1.48399300  | -5.21616800 | 1.98555100  |
| H | 0.62768800  | -5.48031300 | 2.61472300  |
| H | 2.00537000  | -6.14513700 | 1.72181300  |
| H | 2.18368200  | -4.61818600 | 2.58218300  |
| H | -1.19965400 | 0.98072600  | -1.23814000 |
| H | -1.93786100 | -0.62483900 | -1.32524300 |
| C | 3.43342300  | 1.39657400  | -2.09248000 |
| C | 3.71037500  | 2.24829700  | -1.00928900 |
| C | 4.40320200  | 1.20792900  | -3.08906900 |
| C | 4.93432600  | 2.90199100  | -0.93911700 |
| H | 2.96171000  | 2.38018600  | -0.22684300 |
| C | 5.62749400  | 1.85891400  | -3.00048900 |
| H | 4.18506200  | 0.55037300  | -3.92780600 |
| C | 5.89636300  | 2.70839100  | -1.92938400 |
| H | 5.14089000  | 3.56426100  | -0.10102200 |
| H | 6.37371200  | 1.70676700  | -3.77694000 |
| H | 6.85347500  | 3.22107200  | -1.86713600 |
| N | -0.36382200 | 1.85834200  | 3.02333900  |
| H | -1.34324100 | 2.11051000  | 3.10752600  |
| C | 0.31950800  | 2.37275500  | 1.95411900  |
| O | 1.43733600  | 1.97594000  | 1.63228900  |
| C | -0.40964500 | 3.40915600  | 1.16916600  |
| C | -0.14852500 | 3.47775600  | -0.20296400 |
| C | -1.35960700 | 4.26542400  | 1.73553000  |
| C | -0.84847600 | 4.37317700  | -1.00330400 |
| H | 0.59767300  | 2.81077800  | -0.63424500 |
| C | -2.04397800 | 5.17373000  | 0.93437200  |
| H | -1.54598200 | 4.25063800  | 2.80826700  |
| C | -1.79545900 | 5.22243300  | -0.43508700 |

|    |             |             |             |
|----|-------------|-------------|-------------|
| H  | -0.65186500 | 4.41165100  | -2.07215100 |
| H  | -2.76987500 | 5.84823100  | 1.38199600  |
| H  | -2.33895500 | 5.92671200  | -1.06086900 |
| H  | 1.25614400  | -0.85947400 | 6.35793900  |
| Cu | 1.52737300  | -0.46294400 | 0.45320200  |
| C  | 5.97449100  | -0.26971000 | 0.78068800  |
| H  | 6.32993200  | -0.10635500 | -0.24227100 |
| H  | 6.45557000  | -1.16199700 | 1.19187700  |
| H  | 6.23622600  | 0.59749400  | 1.39467400  |
| C  | 4.54382800  | -0.43937600 | 0.76737100  |
| N  | 3.39359600  | -0.55979600 | 0.74261400  |
| C  | -4.31281100 | 1.33837200  | -0.74210100 |
| C  | -4.94384600 | 0.22585500  | -1.28501400 |
| C  | -4.73545700 | -1.00137700 | -0.66344400 |
| C  | -3.91151600 | -1.10609100 | 0.44235400  |
| C  | -3.49482800 | 1.22523000  | 0.36971900  |
| H  | -5.57912400 | 0.31184800  | -2.16208600 |
| H  | -2.95785300 | 2.04954100  | 0.83477100  |
| N  | -3.31364200 | 0.00689200  | 0.92212100  |
| O  | -2.50161000 | -0.11466400 | 1.95227900  |
| H  | -3.68894400 | -2.02691000 | 0.97148400  |
| Cl | -5.48647000 | -2.43124700 | -1.27427200 |
| Cl | -4.51082400 | 2.89483500  | -1.46300500 |

**SMD-M06/6-31G(d,p)/SDD**

Electronic Energy (0K) = -3500.223191

Electronic Energy (0K) + ZPE = -3499.627230

Enthalpy (353K) = -3499.562818

Free Energy (353K) = -3499.733835

**SMD-M06/6-311++G(d,p)/SDD**

Electronic Energy (0K) = -3500.783583

**B1**

Number of imaginary frequencies: 0

|   |             |             |             |
|---|-------------|-------------|-------------|
| C | 2.12612800  | 0.71917800  | -2.24360000 |
| C | 1.08150700  | 0.09535200  | -2.22570300 |
| N | -0.11711800 | -0.51224200 | -2.17424200 |
| C | -1.01152500 | -0.15427600 | -1.04066500 |
| C | -0.40120200 | -0.38743400 | 0.30964900  |
| C | -0.96225600 | -0.39551500 | 1.51105200  |
| C | -0.24805100 | -0.48982500 | 2.80847600  |
| C | 0.17384700  | -1.71645500 | 3.32508600  |
| C | 0.07537900  | 0.68711000  | 3.50179900  |
| C | 0.92586300  | -1.76711000 | 4.49458500  |
| H | -0.07223000 | -2.62979200 | 2.78327300  |
| C | 0.82995200  | 0.63783400  | 4.66676100  |
| C | 1.25853000  | -0.59101000 | 5.16225900  |
| H | 1.25535000  | -2.72711700 | 4.88580100  |
| H | 1.07777200  | 1.56698300  | 5.17526400  |
| S | -0.21607500 | -2.12337700 | -2.76369800 |
| O | 0.72616800  | -2.18709400 | -3.86796200 |
| O | -1.63885800 | -2.36346100 | -2.96228500 |
| C | 0.34942800  | -3.13226100 | -1.43279600 |
| C | 1.71999300  | -3.21136200 | -1.17975000 |
| C | -0.58262300 | -3.72086400 | -0.58306100 |
| C | 2.15053800  | -3.88681500 | -0.04752300 |
| H | 2.43562100  | -2.75150500 | -1.85833400 |
| C | -0.12967400 | -4.39750700 | 0.54236600  |
| H | -1.64537300 | -3.64986000 | -0.80574200 |
| C | 1.23576300  | -4.47692600 | 0.83392700  |
| H | 3.21628800  | -3.95119200 | 0.16765300  |

|   |             |             |             |
|---|-------------|-------------|-------------|
| H | -0.84606300 | -4.86668000 | 1.21519000  |
| C | 1.72070000  | -5.17829700 | 2.06218900  |
| H | 0.90177800  | -5.38363900 | 2.75953900  |
| H | 2.19094500  | -6.13671000 | 1.80751700  |
| H | 2.47899300  | -4.57985900 | 2.58122000  |
| H | -1.22692800 | 0.91598300  | -1.18478400 |
| H | -1.93942700 | -0.69750600 | -1.25112600 |
| C | 3.36416300  | 1.42312200  | -2.21512400 |
| C | 3.64709100  | 2.30711000  | -1.15852400 |
| C | 4.32020800  | 1.22822400  | -3.22419800 |
| C | 4.85892400  | 2.98633800  | -1.12904400 |
| H | 2.91056100  | 2.44991000  | -0.36632600 |
| C | 5.53309400  | 1.90427900  | -3.17554900 |
| H | 4.09996100  | 0.54561700  | -4.04214700 |
| C | 5.80562800  | 2.78754000  | -2.13298000 |
| H | 5.06738000  | 3.67378100  | -0.31185600 |
| H | 6.26762800  | 1.74621800  | -3.96204400 |
| H | 6.75271200  | 3.32135100  | -2.10352500 |
| N | -0.36502900 | 1.93396100  | 2.96483900  |
| H | -1.36654400 | 2.09098100  | 2.99161200  |
| C | 0.31744100  | 2.52806500  | 1.93223900  |
| O | 1.48097300  | 2.25447100  | 1.66175900  |
| C | -0.48651600 | 3.48909500  | 1.12125600  |
| C | -0.19322400 | 3.58086300  | -0.24257000 |
| C | -1.54014400 | 4.23974500  | 1.65409000  |
| C | -0.96544800 | 4.38812200  | -1.07033600 |
| H | 0.63418000  | 2.99821600  | -0.64621700 |
| C | -2.29878300 | 5.06067900  | 0.82572200  |
| H | -1.75474500 | 4.21000500  | 2.72142900  |
| C | -2.01877900 | 5.12752000  | -0.53723400 |

|    |             |             |             |
|----|-------------|-------------|-------------|
| H  | -0.74304600 | 4.44255000  | -2.13338600 |
| H  | -3.10847700 | 5.65221600  | 1.24633200  |
| H  | -2.62195400 | 5.76013900  | -1.18476500 |
| H  | 1.85046500  | -0.62853200 | 6.07351200  |
| Cu | 1.51505300  | -0.49371100 | 0.51331900  |
| C  | 5.92947900  | 0.03092100  | 0.65425100  |
| H  | 6.22844600  | 0.14407400  | -0.39350800 |
| H  | 6.50136400  | -0.78293800 | 1.10946700  |
| H  | 6.13800800  | 0.96324300  | 1.18832800  |
| C  | 4.51932300  | -0.25744200 | 0.71751500  |
| N  | 3.38344400  | -0.47599000 | 0.75318400  |
| C  | -4.42799000 | 1.23237100  | -0.64441500 |
| C  | -5.02894900 | 0.09498500  | -1.17401400 |
| C  | -4.71570500 | -1.14423500 | -0.62178500 |
| C  | -3.81757800 | -1.23618800 | 0.42809400  |
| C  | -3.52232800 | 1.12807000  | 0.39900800  |
| H  | -5.73177400 | 0.17374300  | -1.99956700 |
| H  | -2.99368100 | 1.95846100  | 0.86547400  |
| N  | -3.25552400 | -0.09948600 | 0.87483800  |
| O  | -2.38543900 | -0.20210700 | 1.90879900  |
| H  | -3.51142500 | -2.15536900 | 0.91913100  |
| Cl | -5.41900400 | -2.58477300 | -1.24655600 |
| Cl | -4.78461400 | 2.78963600  | -1.28262200 |

**SMD-M06/6-31G(d,p)/SDD**

Electronic Energy (0K) = -3500.228966

Electronic Energy (0K) + ZPE = -3499.630137

Enthalpy (353K) = -3499.565981

Free Energy (353K) = -3499.737619

**SMD-M06/6-311++G(d,p)/SDD**

Electronic Energy (0K) = -3500.788550



**A2**

Number of imaginary frequencies: 0

|   |             |             |             |
|---|-------------|-------------|-------------|
| C | -0.98077800 | 2.62667300  | -0.04497500 |
| C | 0.14162900  | 2.76040900  | -0.49103200 |
| N | 1.39433600  | 2.90303100  | -0.96524400 |
| C | 1.79529900  | 2.06945000  | -2.11407200 |
| C | 1.71286600  | 0.62889600  | -1.84521700 |
| C | 1.83785200  | -0.56510200 | -1.55062800 |
| C | 2.24592900  | -1.89484900 | -1.20148200 |
| C | 3.59983200  | -2.25567700 | -1.23554200 |
| C | 1.28908900  | -2.83344200 | -0.79579100 |
| C | 3.98328500  | -3.53461000 | -0.85965300 |
| H | 4.33531000  | -1.52266900 | -1.55867000 |
| C | 1.68031600  | -4.10955300 | -0.41143900 |
| C | 3.02606900  | -4.45939900 | -0.44442900 |
| H | 5.03358500  | -3.81250200 | -0.88878400 |
| H | 0.92570300  | -4.82298800 | -0.08667400 |
| S | 2.60869200  | 3.29019100  | 0.21072500  |
| O | 1.98290800  | 4.27415800  | 1.07538200  |
| O | 3.79426800  | 3.60285300  | -0.57188700 |
| C | 2.85558800  | 1.78166700  | 1.08449900  |
| C | 1.86944600  | 1.34937000  | 1.97525500  |
| C | 3.96254200  | 0.99460400  | 0.77990700  |
| C | 1.98840600  | 0.08611400  | 2.53176500  |
| H | 1.02690900  | 1.98936900  | 2.22634100  |
| C | 4.07021400  | -0.25912100 | 1.36883400  |
| H | 4.72035500  | 1.35772600  | 0.08959400  |
| C | 3.07395700  | -0.74312100 | 2.22072000  |
| H | 1.21986000  | -0.27808200 | 3.21049800  |

|   |             |             |             |
|---|-------------|-------------|-------------|
| H | 4.93217100  | -0.88586800 | 1.14529100  |
| C | 3.12009300  | -2.13891400 | 2.75134200  |
| H | 4.10069300  | -2.60231600 | 2.60139500  |
| H | 2.87717300  | -2.17173500 | 3.81973900  |
| H | 2.36519100  | -2.74767100 | 2.23238800  |
| H | 1.15688400  | 2.34769800  | -2.95980500 |
| H | 2.82497400  | 2.33617600  | -2.38115500 |
| C | -2.29873100 | 2.45916400  | 0.47447400  |
| C | -3.26106800 | 3.46781800  | 0.31319300  |
| C | -2.65298200 | 1.26979700  | 1.13329400  |
| C | -4.55003500 | 3.28869500  | 0.79960600  |
| H | -2.98365400 | 4.38848000  | -0.19542600 |
| C | -3.94495900 | 1.09575800  | 1.61188300  |
| H | -1.90393700 | 0.48659800  | 1.26363400  |
| C | -4.89462000 | 2.10388700  | 1.44645300  |
| H | -5.28874300 | 4.07674400  | 0.67396000  |
| H | -4.20984900 | 0.17094700  | 2.12044300  |
| H | -5.90405700 | 1.96642600  | 1.82730000  |
| N | -0.10312600 | -2.46287900 | -0.78776900 |
| H | -0.64960200 | -2.98980900 | -1.46710700 |
| C | -0.72107200 | -2.32368500 | 0.47448200  |
| O | -0.04869000 | -2.10956100 | 1.46626300  |
| C | -2.20386700 | -2.42393500 | 0.51297300  |
| C | -2.79957400 | -2.45196200 | 1.77919400  |
| C | -3.01159300 | -2.49663800 | -0.62726900 |
| C | -4.17788700 | -2.56121500 | 1.90434200  |
| H | -2.16183500 | -2.39471300 | 2.65772800  |
| C | -4.39303100 | -2.58491400 | -0.49924600 |
| H | -2.58291300 | -2.46878100 | -1.62728000 |
| C | -4.97715400 | -2.62053900 | 0.76436400  |

|    |             |             |             |
|----|-------------|-------------|-------------|
| H  | -4.63084900 | -2.59571600 | 2.89220300  |
| H  | -5.01405600 | -2.63233800 | -1.39084700 |
| H  | -6.05744000 | -2.69948500 | 0.86084500  |
| H  | 3.32890500  | -5.45965300 | -0.14581500 |
| Cu | -0.16891600 | -0.29429500 | -1.59849000 |
| C  | -4.46642700 | 0.90264700  | -2.18808800 |
| H  | -4.55847500 | 1.92270500  | -2.57330900 |
| H  | -4.91567300 | 0.85134400  | -1.18874800 |
| H  | -4.98805400 | 0.21355700  | -2.85914100 |
| C  | -3.07704200 | 0.53716600  | -2.09345500 |
| N  | -1.96500000 | 0.23639300  | -1.99236200 |

**SMD-M06/6-31G(d,p)/SDD**

Electronic Energy (0K) = -2257.871381

Electronic Energy (0K) + ZPE = -2257.350010

Enthalpy (353K) = -2257.296864

Free Energy (353K) = -2257.441920

**SMD-M06/6-311++G(d,p)/SDD**

Electronic Energy (0K) = -2258.295094

**TS<sub>A2</sub>**

Number of imaginary frequencies: 1

|   |             |             |             |
|---|-------------|-------------|-------------|
| C | 1.30658700  | -2.60241600 | 0.87166300  |
| C | 0.15657000  | -2.25714000 | 0.67330900  |
| N | -1.13554200 | -1.90248200 | 0.56023400  |
| C | -1.68277900 | -1.47328400 | -0.74177500 |
| C | -1.38591900 | -0.05697100 | -1.08419800 |
| C | -0.45697200 | 0.83605300  | -0.99469100 |
| C | -0.39448500 | 2.29548600  | -0.99048600 |
| C | -1.55253300 | 3.07435200  | -0.81900700 |
| C | 0.84247200  | 2.96994900  | -1.01110200 |

|   |             |             |             |
|---|-------------|-------------|-------------|
| C | -1.48367400 | 4.44482200  | -0.62138400 |
| H | -2.51706300 | 2.57681000  | -0.84027000 |
| C | 0.91034000  | 4.34564600  | -0.79816300 |
| C | -0.24593100 | 5.08410300  | -0.58821300 |
| H | -2.39914100 | 5.01557600  | -0.48286500 |
| H | 1.88461900  | 4.82899400  | -0.81104100 |
| S | -1.89555300 | -1.37703500 | 2.01725000  |
| O | -1.56305300 | -2.38844900 | 3.00545100  |
| O | -3.27739300 | -1.11553100 | 1.63253500  |
| C | -1.10190100 | 0.13920200  | 2.44436800  |
| C | 0.22853100  | 0.11792700  | 2.87324700  |
| C | -1.79033500 | 1.33635700  | 2.28013800  |
| C | 0.87883800  | 1.32439700  | 3.07757300  |
| H | 0.74337300  | -0.82396900 | 3.04508300  |
| C | -1.12481300 | 2.53302700  | 2.51448800  |
| H | -2.83821200 | 1.32758700  | 1.99068700  |
| C | 0.22221500  | 2.54743800  | 2.88169700  |
| H | 1.92041400  | 1.32673900  | 3.39521400  |
| H | -1.65543600 | 3.47584000  | 2.39388400  |
| C | 0.96900200  | 3.83117000  | 3.04165400  |
| H | 0.30403500  | 4.69870500  | 2.98050800  |
| H | 1.50267700  | 3.86690400  | 3.99900600  |
| H | 1.72273800  | 3.90918500  | 2.24646700  |
| H | -1.26923800 | -2.16217400 | -1.48841300 |
| H | -2.75697100 | -1.66821400 | -0.70376300 |
| C | 2.66844600  | -2.94727500 | 1.11782300  |
| C | 3.11457500  | -4.26883900 | 0.96595500  |
| C | 3.58113500  | -1.95379500 | 1.51099100  |
| C | 4.44512400  | -4.58848700 | 1.20650200  |
| H | 2.40618100  | -5.03645900 | 0.66232900  |

|    |             |             |             |
|----|-------------|-------------|-------------|
| C  | 4.90640600  | -2.28344900 | 1.76266700  |
| H  | 3.23410100  | -0.92470100 | 1.61102900  |
| C  | 5.34072600  | -3.59980400 | 1.60899400  |
| H  | 4.78392700  | -5.61488000 | 1.08730000  |
| H  | 5.60395300  | -1.51296200 | 2.08401000  |
| H  | 6.37921100  | -3.85532300 | 1.80679300  |
| N  | 2.04444400  | 2.26826000  | -1.29088900 |
| H  | 2.13584900  | 1.84850900  | -2.20973200 |
| C  | 3.10822200  | 2.20829500  | -0.42461100 |
| O  | 3.03458700  | 2.59792800  | 0.73358900  |
| C  | 4.35465700  | 1.60196500  | -0.97557800 |
| C  | 5.23928800  | 1.01165200  | -0.06919700 |
| C  | 4.67472100  | 1.62404200  | -2.33612000 |
| C  | 6.41273500  | 0.41998400  | -0.52019500 |
| H  | 4.99030700  | 1.02836400  | 0.99000100  |
| C  | 5.85639300  | 1.04350500  | -2.78470300 |
| H  | 4.02229700  | 2.12267800  | -3.05089400 |
| C  | 6.72101500  | 0.43279800  | -1.87947300 |
| H  | 7.09504500  | -0.04459000 | 0.18837200  |
| H  | 6.10668600  | 1.07650200  | -3.84245300 |
| H  | 7.64322800  | -0.02370600 | -2.23227300 |
| H  | -0.18240500 | 6.15680000  | -0.42247500 |
| Cu | 1.16652400  | -0.24759000 | -1.07863900 |
| C  | 4.82315400  | -2.63638700 | -2.11331000 |
| H  | 4.53878100  | -3.67515000 | -2.30787900 |
| H  | 5.47127700  | -2.59840400 | -1.22953600 |
| H  | 5.36601000  | -2.24041300 | -2.97720300 |
| C  | 3.64405100  | -1.84576000 | -1.86773200 |
| N  | 2.70006100  | -1.21314000 | -1.65101200 |
| C  | -5.90555100 | -1.36922700 | -1.89102000 |

|    |             |             |             |
|----|-------------|-------------|-------------|
| C  | -6.51722700 | -0.97219200 | -0.70654100 |
| C  | -5.86101600 | -0.02262200 | 0.06474600  |
| C  | -4.64499700 | 0.50330900  | -0.33340800 |
| C  | -4.68399400 | -0.84877500 | -2.27441400 |
| H  | -7.47104000 | -1.39016900 | -0.39739500 |
| H  | -4.14619700 | -1.12110000 | -3.17628100 |
| N  | -4.08660400 | 0.07130200  | -1.48206100 |
| O  | -2.91531500 | 0.55860900  | -1.85845000 |
| H  | -4.08774300 | 1.25415400  | 0.21554400  |
| Cl | -6.53713700 | 0.51977500  | 1.55790500  |
| Cl | -6.66034500 | -2.54276500 | -2.91091000 |

**SMD-M06/6-31G(d,p)/SDD**

Electronic Energy (0K) = -3500.215477

Electronic Energy (0K) + ZPE = -3499.619052

Enthalpy (353K) = -3499.554890

Free Energy (353K) = -3499.724602

**SMD-M06/6-311++G(d,p)/SDD**

Electronic Energy (0K) = -3500.775407

**B2**

Number of imaginary frequencies: 0

|   |             |             |             |
|---|-------------|-------------|-------------|
| C | 1.47704500  | -2.85293800 | 0.56980700  |
| C | 0.34771600  | -2.43244400 | 0.39694600  |
| N | -0.93308400 | -2.02413600 | 0.35413400  |
| C | -1.55249900 | -1.54247600 | -0.89733400 |
| C | -1.52566300 | -0.04396200 | -1.08518000 |
| C | -0.51996000 | 0.81204300  | -0.86314800 |
| C | -0.62835000 | 2.28318900  | -0.79113600 |
| C | -1.83985200 | 2.93922000  | -0.49063900 |
| C | 0.52194200  | 3.10620100  | -0.83033900 |

|   |             |             |             |
|---|-------------|-------------|-------------|
| C | -1.90741400 | 4.29116500  | -0.19347000 |
| H | -2.76131500 | 2.36818400  | -0.46865800 |
| C | 0.45626900  | 4.46677300  | -0.52887900 |
| C | -0.74878500 | 5.06378900  | -0.19307000 |
| H | -2.86826900 | 4.74106500  | 0.04705200  |
| H | 1.37355600  | 5.04981800  | -0.56704100 |
| S | -1.66084500 | -1.70793200 | 1.87577500  |
| O | -1.21688400 | -2.77833200 | 2.75219200  |
| O | -3.07637300 | -1.52087200 | 1.57465800  |
| C | -0.97378900 | -0.17776800 | 2.43321400  |
| C | 0.39884400  | -0.09869900 | 2.68258900  |
| C | -1.79362600 | 0.93818900  | 2.55862400  |
| C | 0.95204500  | 1.13499200  | 2.98655200  |
| H | 1.02470100  | -0.98642000 | 2.63053700  |
| C | -1.22097300 | 2.16196200  | 2.88494400  |
| H | -2.86945700 | 0.85026200  | 2.42494900  |
| C | 0.15735200  | 2.28761000  | 3.06843600  |
| H | 2.02436200  | 1.21466700  | 3.16019500  |
| H | -1.85480300 | 3.04193000  | 2.98109300  |
| C | 0.78623500  | 3.61860000  | 3.32258800  |
| H | 0.03452000  | 4.39900400  | 3.47925300  |
| H | 1.44582800  | 3.58883100  | 4.19829400  |
| H | 1.40719200  | 3.89445900  | 2.45948000  |
| H | -1.01841800 | -2.06250100 | -1.70232500 |
| H | -2.57674100 | -1.92893200 | -0.91319200 |
| C | 2.84256800  | -3.20730000 | 0.78360800  |
| C | 3.30492200  | -4.50530500 | 0.51969400  |
| C | 3.74709700  | -2.24141300 | 1.25947500  |
| C | 4.64103500  | -4.82719500 | 0.72543600  |
| H | 2.60467500  | -5.25362000 | 0.15493500  |

|    |             |             |             |
|----|-------------|-------------|-------------|
| C  | 5.07874200  | -2.57217000 | 1.47148800  |
| H  | 3.39060400  | -1.22898200 | 1.45069400  |
| C  | 5.52833600  | -3.86492800 | 1.20294900  |
| H  | 4.99080400  | -5.83587400 | 0.51856500  |
| H  | 5.76947600  | -1.81904600 | 1.84505700  |
| H  | 6.57182900  | -4.12277000 | 1.36892500  |
| N  | 1.79135300  | 2.58456700  | -1.19012500 |
| H  | 1.86290300  | 2.07085400  | -2.06114500 |
| C  | 2.87269600  | 2.58684000  | -0.34575900 |
| O  | 2.81499500  | 2.99794100  | 0.80634100  |
| C  | 4.13272800  | 2.02580900  | -0.91519800 |
| C  | 5.03771500  | 1.44187900  | -0.02467700 |
| C  | 4.44013700  | 2.07919900  | -2.27723700 |
| C  | 6.22475200  | 0.89285300  | -0.49348600 |
| H  | 4.79357600  | 1.42719800  | 1.03584000  |
| C  | 5.63750500  | 1.54510000  | -2.74272100 |
| H  | 3.76114700  | 2.56446500  | -2.97645600 |
| C  | 6.52604100  | 0.94462700  | -1.85380000 |
| H  | 6.92498600  | 0.43558100  | 0.20207700  |
| H  | 5.88037100  | 1.60440700  | -3.80120000 |
| H  | 7.46048300  | 0.52479300  | -2.22004100 |
| H  | -0.78640500 | 6.12406400  | 0.04461400  |
| Cu | 1.19742600  | -0.06188100 | -0.95461700 |
| C  | 4.87207300  | -2.26514900 | -2.30441900 |
| H  | 4.57106700  | -3.26449200 | -2.63428800 |
| H  | 5.54400200  | -2.35735800 | -1.44291700 |
| H  | 5.39550900  | -1.75718700 | -3.12011400 |
| C  | 3.70871000  | -1.50845100 | -1.91640100 |
| N  | 2.77884400  | -0.90554400 | -1.58420000 |
| C  | -5.92627700 | -1.10461700 | -2.01085200 |



|    |             |             |             |
|----|-------------|-------------|-------------|
| C  | -6.44550900 | -0.90852900 | -0.73403300 |
| C  | -5.65846100 | -0.24932600 | 0.20069400  |
| C  | -4.39142600 | 0.20069000  | -0.13342900 |
| C  | -4.65593100 | -0.66340500 | -2.33036800 |
| H  | -7.44136600 | -1.25931100 | -0.47569300 |
| H  | -4.17520700 | -0.77935700 | -3.29620900 |
| N  | -3.94606400 | -0.03338700 | -1.37585400 |
| O  | -2.72214100 | 0.44663400  | -1.77100200 |
| H  | -3.72580800 | 0.72580900  | 0.54214200  |
| Cl | -6.23806000 | 0.03412000  | 1.79702300  |
| Cl | -6.85392100 | -1.90997300 | -3.21978400 |

### **SMD-M06/6-31G(d,p)/SDD**

Electronic Energy (0K) = -3500.224283

Electronic Energy (0K) + ZPE = -3499.625804

Enthalpy (353K) = -3499.561812

Free Energy (353K) = -3499.730812

### **SMD-M06/6-311++G(d,p)/SDD**

Electronic Energy (0K) = -3500.781662

### **A3**

Number of imaginary frequencies: 0

|   |             |             |             |
|---|-------------|-------------|-------------|
| C | 0.03549800  | -1.39892900 | 0.16397500  |
| C | 0.97896500  | -1.03672100 | 0.88535600  |
| N | 1.73725100  | -0.46174700 | 1.84267900  |
| C | 1.08190300  | 0.56575600  | 2.69744900  |
| C | 0.36916000  | 1.56061500  | 1.91291600  |
| C | -0.21490600 | 2.32085700  | 1.16744600  |
| C | -0.97963000 | 3.14470100  | 0.29241000  |
| C | -0.45208000 | 4.33940600  | -0.21067000 |
| C | -2.28198300 | 2.73226600  | -0.09017300 |

|   |             |             |             |
|---|-------------|-------------|-------------|
| C | -1.18884100 | 5.12447900  | -1.08457400 |
| H | 0.54948300  | 4.63328000  | 0.09912800  |
| C | -3.01454800 | 3.52823200  | -0.97468900 |
| C | -2.46470200 | 4.70977800  | -1.46011600 |
| H | -0.77186700 | 6.05139700  | -1.47022700 |
| H | -4.00690500 | 3.21108000  | -1.27097600 |
| S | 3.38654400  | -0.18062000 | 1.39230700  |
| O | 3.72117800  | -1.34426400 | 0.56943300  |
| O | 4.08496600  | 0.08858400  | 2.63497300  |
| C | 3.33111200  | 1.26590200  | 0.39467100  |
| C | 2.88662200  | 1.15874900  | -0.92535500 |
| C | 3.60632900  | 2.49954400  | 0.98053100  |
| C | 2.71911000  | 2.31992100  | -1.66279000 |
| H | 2.68504900  | 0.18634900  | -1.37019200 |
| C | 3.43726500  | 3.64743800  | 0.21860700  |
| H | 3.94581300  | 2.55776500  | 2.01185300  |
| C | 2.98985400  | 3.57649200  | -1.10459900 |
| H | 2.37341400  | 2.25753300  | -2.69307200 |
| H | 3.65136400  | 4.61979600  | 0.65837700  |
| C | 2.81620200  | 4.81667300  | -1.92116700 |
| H | 2.70319200  | 5.70342600  | -1.28852800 |
| H | 3.69178100  | 4.98059200  | -2.56292200 |
| H | 1.94420600  | 4.74042000  | -2.58016300 |
| H | 0.39924000  | 0.02999200  | 3.36778900  |
| H | 1.85986000  | 1.00805700  | 3.33103000  |
| C | -1.03288200 | -1.53554500 | -0.77796100 |
| C | -1.76359700 | -2.72840900 | -0.88201600 |
| C | -1.34281800 | -0.44553800 | -1.60852200 |
| C | -2.79213200 | -2.82543500 | -1.80849800 |
| H | -1.51948400 | -3.56308900 | -0.22726300 |

|    |             |             |             |
|----|-------------|-------------|-------------|
| C  | -2.37896600 | -0.55058400 | -2.52574300 |
| H  | -0.76288100 | 0.47244400  | -1.51878500 |
| C  | -3.10036600 | -1.73937800 | -2.62715500 |
| H  | -3.36283800 | -3.74736800 | -1.88794400 |
| H  | -2.62866200 | 0.29840000  | -3.15794100 |
| H  | -3.91137100 | -1.81914800 | -3.34729700 |
| N  | -2.74670400 | 1.53601000  | 0.45527900  |
| H  | -2.07114400 | 1.06704200  | 1.04826300  |
| C  | -3.90883900 | 0.85473900  | 0.19178300  |
| O  | -4.75966900 | 1.24764900  | -0.59499900 |
| C  | -4.05527200 | -0.43621300 | 0.93330400  |
| C  | -5.02420400 | -1.32721200 | 0.46520900  |
| C  | -3.28873700 | -0.78771000 | 2.05069100  |
| C  | -5.21060100 | -2.55681700 | 1.08413800  |
| H  | -5.62124000 | -1.03832500 | -0.39654800 |
| C  | -3.47783600 | -2.01708300 | 2.67189200  |
| H  | -2.55879400 | -0.09840300 | 2.47518900  |
| C  | -4.43394300 | -2.90599800 | 2.18609600  |
| H  | -5.96294000 | -3.24530100 | 0.70645000  |
| H  | -2.88457800 | -2.27657900 | 3.54557400  |
| H  | -4.58016500 | -3.86705400 | 2.67388000  |
| H  | -3.05127400 | 5.31653400  | -2.14630900 |
| N  | 2.47373100  | -4.02548200 | -1.11794600 |
| C  | 2.94399300  | -4.90532300 | -1.70175800 |
| C  | 3.52854700  | -5.99921400 | -2.43080900 |
| H  | 2.94590800  | -6.90924700 | -2.25888600 |
| H  | 3.53257300  | -5.76650700 | -3.49996600 |
| H  | 4.55672500  | -6.15755900 | -2.09129900 |
| Cu | 1.72907000  | -2.58101600 | -0.15726600 |

**SMD-M06/6-31G(d,p)/SDD**

Electronic Energy (0K) = -2257.868137

Electronic Energy (0K) + ZPE = -2257.346982

Enthalpy (353K) = -2257.293033

Free Energy (353K) = -2257.443391

**SMD-M06/6-311++G(d,p)/SDD**

Electronic Energy (0K) = -2258.293617

**TS<sub>A3</sub>**

Number of imaginary frequencies: 1

|   |             |             |             |
|---|-------------|-------------|-------------|
| C | 0.11367900  | -0.65209600 | 0.79127200  |
| C | -0.75034700 | -1.37764200 | 0.15172800  |
| N | -0.91298600 | -1.79309300 | -1.14938100 |
| C | -0.38618900 | -0.96000700 | -2.26505200 |
| C | -0.63997700 | 0.45680400  | -2.06495000 |
| C | -0.89516300 | 1.60378100  | -1.76108500 |
| C | -1.19555200 | 2.93989400  | -1.37267800 |
| C | -2.39824200 | 3.52322300  | -1.79417200 |
| C | -0.31558900 | 3.66854800  | -0.53513000 |
| C | -2.74723900 | 4.80444000  | -1.39962600 |
| H | -3.05091900 | 2.93730600  | -2.43895900 |
| C | -0.68120200 | 4.96017100  | -0.13984900 |
| C | -1.88118300 | 5.51292800  | -0.56995800 |
| H | -3.68368100 | 5.24461400  | -1.73308700 |
| H | -0.01994000 | 5.52062800  | 0.50860700  |
| S | -2.41200400 | -2.56928600 | -1.50308400 |
| O | -2.72767600 | -3.38152600 | -0.33101600 |
| O | -2.22816500 | -3.19092300 | -2.80504700 |
| C | -3.57207700 | -1.24580900 | -1.63656700 |
| C | -4.11284900 | -0.69431800 | -0.47327100 |
| C | -3.82444900 | -0.69132700 | -2.88951000 |

|   |             |             |             |
|---|-------------|-------------|-------------|
| C | -4.89821900 | 0.44376500  | -0.57718400 |
| H | -3.92388200 | -1.15340200 | 0.49746400  |
| C | -4.62388400 | 0.44104700  | -2.97080500 |
| H | -3.40033100 | -1.13915800 | -3.78502700 |
| C | -5.16072400 | 1.02973900  | -1.82143000 |
| H | -5.32218400 | 0.88899400  | 0.32131800  |
| H | -4.82895900 | 0.88525700  | -3.94336900 |
| C | -6.01228500 | 2.25571800  | -1.91522800 |
| H | -5.79923800 | 2.82473600  | -2.82672400 |
| H | -7.07685200 | 1.98857800  | -1.93820200 |
| H | -5.86344200 | 2.91055300  | -1.04944300 |
| H | 0.68367000  | -1.16497000 | -2.36936300 |
| H | -0.84122900 | -1.32464100 | -3.19286400 |
| C | 0.24811000  | 0.25327200  | 1.91518900  |
| C | 1.43890000  | 0.37562500  | 2.64329800  |
| C | -0.85871900 | 1.03965600  | 2.28350200  |
| C | 1.50639600  | 1.23018600  | 3.73581100  |
| H | 2.32200200  | -0.18518000 | 2.34230200  |
| C | -0.78522300 | 1.89212500  | 3.37732200  |
| H | -1.77381700 | 0.97252100  | 1.69559700  |
| C | 0.39663400  | 1.98573900  | 4.10894500  |
| H | 2.43498700  | 1.31055100  | 4.29651300  |
| H | -1.64789200 | 2.49546800  | 3.64941700  |
| H | 0.45746500  | 2.65733600  | 4.96201100  |
| N | 0.90171200  | 3.07620500  | -0.17884800 |
| H | 1.10006600  | 2.17345600  | -0.60654500 |
| C | 1.81624700  | 3.53940400  | 0.74310200  |
| O | 1.59545300  | 4.46484600  | 1.51245300  |
| C | 3.12584700  | 2.82473800  | 0.74963600  |
| C | 3.84931600  | 2.81159900  | 1.94492900  |

|    |             |             |             |
|----|-------------|-------------|-------------|
| C  | 3.66591900  | 2.21933400  | -0.38686700 |
| C  | 5.07077100  | 2.15497200  | 2.01846600  |
| H  | 3.42962400  | 3.31186100  | 2.81470200  |
| C  | 4.90081000  | 1.58145800  | -0.31912500 |
| H  | 3.13787900  | 2.27378800  | -1.33802500 |
| C  | 5.59582800  | 1.53342600  | 0.88660700  |
| H  | 5.62023200  | 2.13360700  | 2.95678400  |
| H  | 5.32684900  | 1.13003800  | -1.21385100 |
| H  | 6.55680200  | 1.02669900  | 0.94021300  |
| H  | -2.13787000 | 6.52026700  | -0.24971500 |
| N  | -2.87115900 | -2.54538600 | 3.09679100  |
| C  | -3.52088900 | -2.88298100 | 3.99157300  |
| C  | -4.33017700 | -3.30091700 | 5.10595500  |
| H  | -4.16648600 | -4.36478700 | 5.30181300  |
| H  | -4.05892500 | -2.72401600 | 5.99516100  |
| H  | -5.38698400 | -3.13522800 | 4.87604900  |
| Cu | -1.84224400 | -1.99431900 | 1.62840900  |
| C  | 3.72905900  | -2.94044400 | -0.28472100 |
| C  | 4.42882300  | -2.75622200 | -1.46931200 |
| C  | 4.10646200  | -1.63377300 | -2.21992100 |
| C  | 3.13314400  | -0.74536800 | -1.80204800 |
| C  | 2.76554000  | -2.04035200 | 0.13866500  |
| H  | 5.18980000  | -3.45918500 | -1.79496400 |
| H  | 2.19682600  | -2.14588800 | 1.05630800  |
| N  | 2.49259800  | -0.95935800 | -0.62751300 |
| O  | 1.61565600  | -0.05846800 | -0.25573800 |
| H  | 2.83066400  | 0.14074500  | -2.35100000 |
| Cl | 4.92133300  | -1.31072400 | -3.71008300 |
| Cl | 4.05465300  | -4.31802500 | 0.70918700  |

**SMD-M06/6-31G(d,p)/SDD**

Electronic Energy (0K) = -3500.223131

Electronic Energy (0K) + ZPE = -3499.626160

Enthalpy (353K) = -3499.561789

Free Energy (353K) = -3499.734842

**SMD-M06/6-311++G(d,p)/SDD**

Electronic Energy (0K) = -3500.784545

### **B3**

Number of imaginary frequencies: 0

|   |             |             |             |
|---|-------------|-------------|-------------|
| C | 0.92867400  | -0.14298000 | 0.51097300  |
| C | -0.01249100 | -1.11363000 | 0.38581500  |
| N | -0.16747100 | -1.78809600 | -0.83801800 |
| C | -0.18276800 | -1.02600600 | -2.11518200 |
| C | -1.03965200 | 0.14982800  | -2.02734200 |
| C | -1.80055500 | 1.07774800  | -1.84259500 |
| C | -2.66611600 | 2.18145100  | -1.59334400 |
| C | -4.00408300 | 2.12614800  | -2.00183900 |
| C | -2.18486400 | 3.32983200  | -0.91784600 |
| C | -4.86810700 | 3.18101900  | -1.75238100 |
| H | -4.34273400 | 1.23230500  | -2.52212900 |
| C | -3.06522900 | 4.38606600  | -0.66503300 |
| C | -4.38877500 | 4.30409400  | -1.08241100 |
| H | -5.90441300 | 3.12771100  | -2.07651900 |
| H | -2.70071800 | 5.26164500  | -0.14253600 |
| S | -1.23803000 | -3.13290700 | -0.86766800 |
| O | -1.17053300 | -3.74832100 | 0.45396600  |
| O | -0.85555300 | -3.89390200 | -2.05024700 |
| C | -2.85946300 | -2.47123700 | -1.12467600 |
| C | -3.58137600 | -1.96171200 | -0.04432900 |
| C | -3.35857600 | -2.39844600 | -2.42401400 |

|   |             |             |             |
|---|-------------|-------------|-------------|
| C | -4.80459300 | -1.35214400 | -0.28308900 |
| H | -3.19972000 | -2.04606000 | 0.97183700  |
| C | -4.58943100 | -1.79369200 | -2.63961700 |
| H | -2.79161300 | -2.81450600 | -3.25291200 |
| C | -5.32481600 | -1.25600600 | -1.57843300 |
| H | -5.37380500 | -0.94539500 | 0.55105000  |
| H | -4.98766800 | -1.73159700 | -3.65100400 |
| C | -6.64972100 | -0.60437300 | -1.81833300 |
| H | -6.70648000 | -0.16600000 | -2.82087700 |
| H | -7.46336000 | -1.33725300 | -1.73879900 |
| H | -6.84801600 | 0.18026600  | -1.07996100 |
| H | 0.83766100  | -0.73928400 | -2.38567900 |
| H | -0.51888300 | -1.69843300 | -2.91191600 |
| C | 1.10926200  | 0.76462000  | 1.65357000  |
| C | 2.38425000  | 1.18523300  | 2.05665400  |
| C | -0.00532600 | 1.25508400  | 2.35140500  |
| C | 2.54032700  | 2.02950500  | 3.14983200  |
| H | 3.26684500  | 0.85002700  | 1.51332800  |
| C | 0.15415400  | 2.09142300  | 3.45146000  |
| H | -1.00526600 | 0.99316100  | 2.00457700  |
| C | 1.42802900  | 2.47861800  | 3.85858400  |
| H | 3.53974400  | 2.33786800  | 3.45021300  |
| H | -0.72409600 | 2.46211200  | 3.97556100  |
| H | 1.55307700  | 3.14236700  | 4.71089300  |
| N | -0.83308400 | 3.34054200  | -0.56352300 |
| H | -0.33568700 | 2.48210000  | -0.77869100 |
| C | -0.10550200 | 4.35701100  | 0.00735100  |
| O | -0.60747100 | 5.37986300  | 0.45431300  |
| C | 1.37263400  | 4.13936900  | 0.04109900  |
| C | 2.10536700  | 4.89345800  | 0.96244000  |



|    |             |             |             |
|----|-------------|-------------|-------------|
| C  | 2.04839000  | 3.28112900  | -0.83188300 |
| C  | 3.48843400  | 4.78735700  | 1.01878500  |
| H  | 1.56844600  | 5.56428700  | 1.62892100  |
| C  | 3.43501000  | 3.18033500  | -0.77769300 |
| H  | 1.50807000  | 2.70669100  | -1.58423700 |
| C  | 4.15676900  | 3.93108900  | 0.14564500  |
| H  | 4.04818700  | 5.37544700  | 1.74238500  |
| H  | 3.95637300  | 2.52111700  | -1.46965200 |
| H  | 5.24117500  | 3.85390000  | 0.18174000  |
| H  | -5.05517400 | 5.13870800  | -0.87626500 |
| N  | -1.74265900 | -2.15533400 | 3.59592900  |
| C  | -2.25578800 | -2.49395000 | 4.57541300  |
| C  | -2.89729500 | -2.91548600 | 5.79370300  |
| H  | -2.73736000 | -3.98746700 | 5.94279200  |
| H  | -2.47695200 | -2.36636500 | 6.64139800  |
| H  | -3.97127200 | -2.71597300 | 5.73180800  |
| Cu | -0.93130200 | -1.62448800 | 1.98529400  |
| C  | 4.14241900  | -2.64516500 | -0.19555600 |
| C  | 4.97986800  | -2.40838400 | -1.27693100 |
| C  | 4.71020600  | -1.30296100 | -2.07729100 |
| C  | 3.64193800  | -0.47096100 | -1.79767800 |
| C  | 3.07098900  | -1.80856000 | 0.07785300  |
| H  | 5.81589300  | -3.06788000 | -1.49409900 |
| H  | 2.36973600  | -1.93659300 | 0.90077500  |
| N  | 2.87442200  | -0.76092700 | -0.73261600 |
| O  | 1.84930600  | 0.14986200  | -0.54574500 |
| H  | 3.36428200  | 0.40680000  | -2.37488300 |
| Cl | 5.70253900  | -0.94601300 | -3.43974700 |
| Cl | 4.41112900  | -3.99920500 | 0.83697100  |

**SMD-M06/6-31G(d,p)/SDD**

Electronic Energy (0K) = -3500.242935

Electronic Energy (0K) + ZPE = -3499.644652

Enthalpy (353K) = -3499.580019

Free Energy (353K) = -3499.756551

**SMD-M06/6-311++G(d,p)/SDD**

Electronic Energy (0K) = -3500.800849

**A4**

Number of imaginary frequencies: 0

|   |             |             |             |
|---|-------------|-------------|-------------|
| C | 1.18921500  | -1.80669400 | -1.04833200 |
| C | 0.23301200  | -1.49979300 | -1.73302400 |
| N | -0.85187400 | -1.15964300 | -2.45805300 |
| C | -1.21953200 | 0.26709800  | -2.50226000 |
| C | -1.28172600 | 0.85475400  | -1.15108700 |
| C | -1.19839400 | 0.81456700  | 0.08761000  |
| C | -0.97604800 | 0.77674600  | 1.48967300  |
| C | -2.05905900 | 0.67538700  | 2.37887700  |
| C | 0.35512600  | 0.84779600  | 1.98339700  |
| C | -1.84135900 | 0.64470400  | 3.74439300  |
| H | -3.06522600 | 0.61673100  | 1.96735000  |
| C | 0.55624600  | 0.80908400  | 3.36671800  |
| C | -0.53250700 | 0.71172600  | 4.22367600  |
| H | -2.67896500 | 0.56751800  | 4.43220400  |
| H | 1.56604900  | 0.85706700  | 3.75389100  |
| S | -2.13026800 | -2.32885600 | -2.47940400 |
| O | -1.47125900 | -3.59167000 | -2.75694600 |
| O | -3.12435300 | -1.76953100 | -3.38245300 |
| C | -2.76891800 | -2.34484300 | -0.83540500 |
| C | -2.09869900 | -3.07333800 | 0.14864900  |
| C | -3.89784200 | -1.58288000 | -0.53963300 |

|   |             |             |             |
|---|-------------|-------------|-------------|
| C | -2.57728300 | -3.02842700 | 1.45029900  |
| H | -1.22574400 | -3.67168100 | -0.10115000 |
| C | -4.36464900 | -1.56305600 | 0.76728900  |
| H | -4.40663600 | -1.02758000 | -1.32394800 |
| C | -3.71343300 | -2.27987500 | 1.77748700  |
| H | -2.06483800 | -3.58884600 | 2.23041900  |
| H | -5.25213200 | -0.98191900 | 1.01344300  |
| C | -4.23039300 | -2.26096600 | 3.18048400  |
| H | -4.81129100 | -1.35466500 | 3.38407100  |
| H | -4.89273700 | -3.11809000 | 3.35926000  |
| H | -3.41429400 | -2.32832200 | 3.90825800  |
| H | -0.46530000 | 0.78889400  | -3.10251400 |
| H | -2.17214800 | 0.36320500  | -3.03304800 |
| C | 2.28849800  | -2.15914500 | -0.20897000 |
| C | 3.55912500  | -2.40676500 | -0.74805800 |
| C | 2.10444900  | -2.22202300 | 1.18196700  |
| C | 4.62460300  | -2.70344100 | 0.09241300  |
| H | 3.69977800  | -2.35208700 | -1.82551800 |
| C | 3.17443800  | -2.51705200 | 2.01569600  |
| H | 1.11455800  | -2.03003600 | 1.59455800  |
| C | 4.43565000  | -2.75588000 | 1.47207500  |
| H | 5.60972500  | -2.88696600 | -0.33042600 |
| H | 3.02530200  | -2.55679100 | 3.09230900  |
| H | 5.27406100  | -2.98375300 | 2.12633100  |
| N | 1.38352100  | 0.93075500  | 1.05067300  |
| H | 1.11160200  | 0.71917200  | 0.09579900  |
| C | 2.73446800  | 1.10169100  | 1.27879600  |
| O | 3.21279800  | 1.23863900  | 2.39459700  |
| C | 3.58388100  | 1.09447900  | 0.05213500  |
| C | 4.95135700  | 0.87520300  | 0.23866300  |

|    |             |            |             |
|----|-------------|------------|-------------|
| C  | 3.09128400  | 1.28470400 | -1.24401100 |
| C  | 5.81134500  | 0.82549600 | -0.85051700 |
| H  | 5.32185900  | 0.73495600 | 1.25124500  |
| C  | 3.95399100  | 1.23967600 | -2.33296200 |
| H  | 2.03618500  | 1.49233800 | -1.42343500 |
| C  | 5.31300700  | 1.00462500 | -2.13858800 |
| H  | 6.87221500  | 0.64404600 | -0.69542100 |
| H  | 3.56431700  | 1.39230300 | -3.33653300 |
| H  | 5.98473500  | 0.96625200 | -2.99308700 |
| H  | -0.34961300 | 0.68308500 | 5.29533500  |
| Cu | -1.46105100 | 2.76754000 | -0.67591300 |
| C  | -2.05890500 | 7.19745400 | -0.62859800 |
| H  | -2.62080800 | 7.48943900 | -1.52095300 |
| H  | -1.08865400 | 7.70274400 | -0.62966600 |
| H  | -2.61950100 | 7.49034700 | 0.26418900  |
| C  | -1.86212400 | 5.77291600 | -0.62877500 |
| N  | -1.70424000 | 4.62782800 | -0.63020200 |

**SMD-M06/6-31G(d,p)/SDD**

Electronic Energy (0K) = -2257.865869

Electronic Energy (0K) + ZPE = -2257.343593

Enthalpy (353K) = -2257.290313

Free Energy (353K) = -2257.438392

**SMD-M06/6-311++G(d,p)/SDD**

Electronic Energy (0K) = -2258.294121

**TS<sub>A4</sub>**

Number of imaginary frequencies: 1

|   |             |             |             |
|---|-------------|-------------|-------------|
| C | -1.31766400 | -2.15546400 | -1.77364600 |
| C | -1.71726900 | -1.02960300 | -2.00274800 |
| N | -2.15850800 | 0.21379100  | -2.24377100 |

|   |             |             |             |
|---|-------------|-------------|-------------|
| C | -1.20665500 | 1.28491500  | -2.59938700 |
| C | -0.30861900 | 1.79353900  | -1.51611900 |
| C | -0.31198300 | 1.49430000  | -0.26255700 |
| C | -0.75743500 | 0.82928700  | 0.92609500  |
| C | -1.65078400 | 1.48498400  | 1.78822100  |
| C | -0.22021400 | -0.42684300 | 1.30401600  |
| C | -2.02411900 | 0.91112700  | 2.99260000  |
| H | -2.03188900 | 2.46038000  | 1.49176200  |
| C | -0.60892500 | -1.00238400 | 2.51666100  |
| C | -1.50217400 | -0.33336200 | 3.34538300  |
| H | -2.71690500 | 1.42691300  | 3.65329100  |
| H | -0.19807200 | -1.96420000 | 2.80202200  |
| S | -3.85095400 | 0.46676800  | -2.25485700 |
| O | -4.43546100 | -0.67962600 | -2.93254400 |
| O | -4.03142500 | 1.81745900  | -2.76785900 |
| C | -4.33555900 | 0.41575800  | -0.55746200 |
| C | -4.36958800 | -0.81332100 | 0.10525700  |
| C | -4.70108300 | 1.59757800  | 0.07853700  |
| C | -4.76705100 | -0.84094900 | 1.43228400  |
| H | -4.10430700 | -1.73179400 | -0.41316100 |
| C | -5.11775600 | 1.54174900  | 1.40358200  |
| H | -4.67373900 | 2.54073100  | -0.46122800 |
| C | -5.15264200 | 0.33024700  | 2.09718400  |
| H | -4.78856500 | -1.78902600 | 1.96793600  |
| H | -5.41536500 | 2.45711600  | 1.91263800  |
| C | -5.59404500 | 0.26939100  | 3.52508500  |
| H | -5.64414700 | 1.26606500  | 3.97564800  |
| H | -6.58994300 | -0.18422300 | 3.60811600  |
| H | -4.91312100 | -0.34946900 | 4.12232500  |
| H | -0.59316000 | 0.90534900  | -3.42671800 |

|    |             |             |             |
|----|-------------|-------------|-------------|
| H  | -1.79178800 | 2.11544600  | -3.00755100 |
| C  | -0.83614100 | -3.44156200 | -1.38640900 |
| C  | -0.15799000 | -4.26186200 | -2.30003900 |
| C  | -0.99945800 | -3.87611300 | -0.06058700 |
| C  | 0.35290900  | -5.48693300 | -1.89112300 |
| H  | -0.02951300 | -3.92141000 | -3.32543200 |
| C  | -0.49418400 | -5.10642900 | 0.33814800  |
| H  | -1.51847200 | -3.23090600 | 0.64782800  |
| C  | 0.18417300  | -5.91212700 | -0.57486600 |
| H  | 0.88705200  | -6.11304000 | -2.60231000 |
| H  | -0.62348800 | -5.43600400 | 1.36658200  |
| H  | 0.58484000  | -6.87255700 | -0.25854800 |
| N  | 0.66059200  | -1.04829300 | 0.41547700  |
| H  | 0.50488400  | -0.81549200 | -0.55847300 |
| C  | 1.61907500  | -1.99057200 | 0.69985400  |
| O  | 1.83476100  | -2.40156800 | 1.83223800  |
| C  | 2.39817700  | -2.46973100 | -0.48086400 |
| C  | 3.09019700  | -3.67440500 | -0.33213400 |
| C  | 2.48033000  | -1.77746100 | -1.69512700 |
| C  | 3.83439400  | -4.19329100 | -1.38371200 |
| H  | 3.02488600  | -4.19665100 | 0.61952500  |
| C  | 3.23253600  | -2.29453300 | -2.74386600 |
| H  | 1.98058800  | -0.81815300 | -1.83772000 |
| C  | 3.90508200  | -3.50467400 | -2.59225500 |
| H  | 4.35997000  | -5.13739200 | -1.26138000 |
| H  | 3.29620000  | -1.74827100 | -3.68195200 |
| H  | 4.48900100  | -3.90821700 | -3.41629600 |
| H  | -1.79418400 | -0.79544900 | 4.28614100  |
| Cu | 1.01518500  | 3.07148600  | -2.08479100 |
| C  | 3.94213500  | 6.05451400  | -3.67318600 |

|    |            |             |             |
|----|------------|-------------|-------------|
| H  | 3.39102100 | 6.86567600  | -4.15820100 |
| H  | 4.60175900 | 5.57902700  | -4.40514400 |
| H  | 4.54414100 | 6.46507700  | -2.85718300 |
| C  | 3.01507100 | 5.08428200  | -3.15252400 |
| N  | 2.26786000 | 4.30613100  | -2.73599200 |
| C  | 2.12841400 | 1.48511600  | 3.70056700  |
| C  | 3.16963900 | 0.62995300  | 3.36931900  |
| C  | 3.49427100 | 0.50558400  | 2.02155200  |
| C  | 2.78790500 | 1.19251600  | 1.05233300  |
| C  | 1.42842000 | 2.17269800  | 2.72223100  |
| H  | 3.71843500 | 0.08612600  | 4.13315600  |
| H  | 0.61181700 | 2.85995100  | 2.91352600  |
| N  | 1.77268700 | 2.00351300  | 1.42870900  |
| O  | 1.06418400 | 2.61459200  | 0.49837600  |
| H  | 2.97950800 | 1.13343400  | -0.01511400 |
| Cl | 4.79746600 | -0.51543600 | 1.52946300  |
| Cl | 1.66748800 | 1.70727300  | 5.35219200  |

**SMD-M06/6-31G(d,p)/SDD**

Electronic Energy (0K) = -3500.214347

Electronic Energy (0K) + ZPE = -3499.618718

Enthalpy (353K) = -3499.553697

Free Energy (353K) = -3499.729646

**SMD-M06/6-311++G(d,p)/SDD**

Electronic Energy (0K) = -3500.780116

**B4**

Number of imaginary frequencies: 0

|   |            |             |             |
|---|------------|-------------|-------------|
| C | 1.25397400 | 1.20939900  | -2.28884000 |
| C | 1.60459200 | 0.07951000  | -2.00793500 |
| N | 1.94534700 | -1.17728100 | -1.67896200 |

|   |             |             |             |
|---|-------------|-------------|-------------|
| C | 0.88260500  | -2.22059600 | -1.67748400 |
| C | -0.03454900 | -2.31538200 | -0.50295600 |
| C | 0.08096700  | -1.63186500 | 0.63443300  |
| C | 0.96266600  | -0.58968100 | 1.20936200  |
| C | 2.01443000  | -0.97454600 | 2.04612600  |
| C | 0.62644900  | 0.77811800  | 1.12082500  |
| C | 2.71581600  | -0.03721300 | 2.79429500  |
| H | 2.25433500  | -2.03440900 | 2.12307100  |
| C | 1.34149200  | 1.72311900  | 1.86350900  |
| C | 2.36960700  | 1.30884300  | 2.70128400  |
| H | 3.52388100  | -0.35478300 | 3.44956100  |
| H | 1.06137900  | 2.76882500  | 1.80023700  |
| S | 3.58669400  | -1.61028600 | -1.94551500 |
| O | 4.02691900  | -0.95292300 | -3.16826400 |
| O | 3.62929900  | -3.06179400 | -1.82653000 |
| C | 4.44562100  | -0.88784800 | -0.58174300 |
| C | 4.61545500  | 0.49726600  | -0.53063500 |
| C | 4.97222800  | -1.72367000 | 0.39702600  |
| C | 5.30289000  | 1.04117000  | 0.54275300  |
| H | 4.22686600  | 1.13668200  | -1.32003800 |
| C | 5.67826700  | -1.15698400 | 1.45169100  |
| H | 4.83926100  | -2.80009800 | 0.32661900  |
| C | 5.84144900  | 0.22619600  | 1.54693700  |
| H | 5.43491000  | 2.12048400  | 0.60536200  |
| H | 6.10389100  | -1.79967600 | 2.22054900  |
| C | 6.55005900  | 0.84233000  | 2.71107200  |
| H | 7.05046000  | 0.08829600  | 3.32672200  |
| H | 7.29808600  | 1.57306500  | 2.38229100  |
| H | 5.84001400  | 1.38259500  | 3.35172600  |
| H | 0.28858700  | -2.07452300 | -2.59117500 |



|    |             |             |             |
|----|-------------|-------------|-------------|
| H  | 1.39070100  | -3.18384000 | -1.80129900 |
| C  | 0.83531000  | 2.56109100  | -2.46773600 |
| C  | -0.04142600 | 2.91115600  | -3.50570400 |
| C  | 1.26042800  | 3.54914200  | -1.56471900 |
| C  | -0.49107000 | 4.21958400  | -3.62803600 |
| H  | -0.37285300 | 2.14387000  | -4.20264700 |
| C  | 0.81708800  | 4.85815400  | -1.70185800 |
| H  | 1.93356300  | 3.26901200  | -0.75501400 |
| C  | -0.06266900 | 5.19441000  | -2.72931600 |
| H  | -1.17947000 | 4.48056900  | -4.42865400 |
| H  | 1.15162300  | 5.61782800  | -0.99915700 |
| H  | -0.41565400 | 6.21832800  | -2.82906100 |
| N  | -0.44392100 | 1.13024300  | 0.28250800  |
| H  | -0.57478300 | 0.50647100  | -0.50373300 |
| C  | -1.24903900 | 2.23676400  | 0.35510800  |
| O  | -1.14792500 | 3.08292100  | 1.23571200  |
| C  | -2.29784500 | 2.33125900  | -0.70816100 |
| C  | -3.03553900 | 3.51705900  | -0.75164600 |
| C  | -2.58290700 | 1.31770700  | -1.63177800 |
| C  | -4.03177100 | 3.69606300  | -1.70250000 |
| H  | -2.80469000 | 4.29489500  | -0.02807800 |
| C  | -3.57839200 | 1.49869000  | -2.58526900 |
| H  | -2.04168100 | 0.37011800  | -1.63207800 |
| C  | -4.30332500 | 2.68716400  | -2.62309000 |
| H  | -4.59545900 | 4.62556600  | -1.72865100 |
| H  | -3.78983000 | 0.70676200  | -3.29983500 |
| H  | -5.08135800 | 2.82524600  | -3.37046800 |
| H  | 2.90851600  | 2.05252800  | 3.28506200  |
| Cu | -1.42238100 | -3.61178500 | -0.71018200 |
| C  | -4.58418200 | -6.72462900 | -1.27721300 |

|    |             |             |             |
|----|-------------|-------------|-------------|
| H  | -4.10199000 | -7.70194100 | -1.37404400 |
| H  | -5.14922900 | -6.50997200 | -2.18926100 |
| H  | -5.26878100 | -6.74276700 | -0.42399900 |
| C  | -3.58333500 | -5.70956300 | -1.07791800 |
| N  | -2.77756300 | -4.89469900 | -0.92122800 |
| C  | -2.22004600 | 0.70690600  | 3.49480000  |
| C  | -3.39125900 | 0.94503500  | 2.78640200  |
| C  | -3.69598000 | 0.11372300  | 1.71037900  |
| C  | -2.83182500 | -0.90170000 | 1.34175300  |
| C  | -1.37345200 | -0.32966900 | 3.13197000  |
| H  | -4.05441800 | 1.76035300  | 3.06531200  |
| H  | -0.44932600 | -0.58703800 | 3.64056900  |
| N  | -1.71273000 | -1.07268300 | 2.06737100  |
| O  | -0.85783000 | -2.07517400 | 1.69241400  |
| H  | -2.97665600 | -1.58394800 | 0.50686400  |
| Cl | -5.14382000 | 0.34917200  | 0.80551800  |
| Cl | -1.77184300 | 1.71056400  | 4.81984500  |

**SMD-M06/6-31G(d,p)/SDD**

Electronic Energy (0K) = -3500.228620

Electronic Energy (0K) + ZPE = -3499.630024

Enthalpy (353K) = -3499.565676

Free Energy (353K) = -3499.738531

**SMD-M06/6-311++G(d,p)/SDD**

Electronic Energy (0K) = -3500.792850

**A5**

Number of imaginary frequencies: 0

|   |             |             |             |
|---|-------------|-------------|-------------|
| C | 0.72076000  | -0.25473600 | 0.85944600  |
| C | 0.39633100  | -1.24617400 | 0.17750400  |
| N | -0.11769700 | -2.30975700 | -0.46437100 |

|   |             |             |             |
|---|-------------|-------------|-------------|
| C | -0.60416300 | -2.09248900 | -1.85158400 |
| C | -1.52069000 | -0.96389200 | -1.91370300 |
| C | -2.22166800 | 0.01897400  | -1.78090700 |
| C | -2.89743600 | 1.25958400  | -1.60127400 |
| C | -4.29399300 | 1.33374000  | -1.56170800 |
| C | -2.12161900 | 2.43352800  | -1.41529400 |
| C | -4.92943200 | 2.54890700  | -1.35192300 |
| H | -4.86662500 | 0.41771000  | -1.69629100 |
| C | -2.77150700 | 3.65180400  | -1.20421500 |
| C | -4.16129300 | 3.69805400  | -1.17636300 |
| H | -6.01483200 | 2.59957900  | -1.32254600 |
| H | -2.17911600 | 4.54676500  | -1.05608000 |
| S | -0.97923100 | -3.45101200 | 0.52077700  |
| O | -0.19425500 | -3.54603800 | 1.73893000  |
| O | -1.19025500 | -4.59796500 | -0.34680100 |
| C | -2.51626000 | -2.65222500 | 0.84083300  |
| C | -2.56672900 | -1.66785800 | 1.82920200  |
| C | -3.60550800 | -2.91749200 | 0.01464900  |
| C | -3.73449900 | -0.93568800 | 1.97697200  |
| H | -1.70734500 | -1.47812500 | 2.46899700  |
| C | -4.76717900 | -2.17624500 | 0.18710800  |
| H | -3.54283900 | -3.68774900 | -0.75025800 |
| C | -4.84613100 | -1.17288700 | 1.15789500  |
| H | -3.78790000 | -0.15888700 | 2.73882600  |
| H | -5.62903700 | -2.37284700 | -0.44822000 |
| C | -6.09315800 | -0.36656800 | 1.33302300  |
| H | -6.77376500 | -0.48458100 | 0.48367900  |
| H | -6.63211600 | -0.67669900 | 2.23751200  |
| H | -5.86122500 | 0.69848800  | 1.44950800  |
| H | 0.28260300  | -1.91578300 | -2.47537300 |

|   |             |             |             |
|---|-------------|-------------|-------------|
| H | -1.05609400 | -3.02898800 | -2.19702400 |
| C | 0.48505700  | 0.96319200  | 1.59386900  |
| C | 1.51660800  | 1.64959100  | 2.24456800  |
| C | -0.81797600 | 1.48708300  | 1.61832700  |
| C | 1.24932100  | 2.84201500  | 2.90571800  |
| H | 2.52625700  | 1.24477200  | 2.21613200  |
| C | -1.07783100 | 2.67915700  | 2.27851900  |
| H | -1.61438800 | 0.95183200  | 1.10231000  |
| C | -0.04356800 | 3.35981500  | 2.91961700  |
| H | 2.05468800  | 3.37380400  | 3.40654800  |
| H | -2.08807200 | 3.08232300  | 2.28628000  |
| H | -0.24700900 | 4.29742300  | 3.43163600  |
| N | -0.73519700 | 2.28044000  | -1.44845500 |
| H | -0.43449000 | 1.31595600  | -1.54436800 |
| C | 0.24893800  | 3.20351600  | -1.19678900 |
| O | 0.03041900  | 4.36998200  | -0.89982700 |
| C | 1.64106300  | 2.66284900  | -1.29938200 |
| C | 2.64978200  | 3.37696700  | -0.64774800 |
| C | 1.97469400  | 1.50270700  | -2.00862400 |
| C | 3.96528000  | 2.93033400  | -0.68226700 |
| H | 2.37970300  | 4.28288800  | -0.10985000 |
| C | 3.29301400  | 1.05783000  | -2.04654700 |
| H | 1.22076000  | 0.95173700  | -2.57139700 |
| C | 4.28903600  | 1.76980100  | -1.38162100 |
| H | 4.74192600  | 3.49241000  | -0.16795000 |
| H | 3.54495000  | 0.16418800  | -2.61419500 |
| H | 5.31960100  | 1.42171200  | -1.41500600 |
| H | -4.65039300 | 4.65527300  | -1.01026700 |
| N | 4.17284300  | -0.38334000 | 1.14671200  |
| C | 5.17027700  | 0.01464100  | 1.57679000  |

|    |            |             |             |
|----|------------|-------------|-------------|
| C  | 6.41106600 | 0.53536700  | 2.09214900  |
| H  | 6.68199000 | 1.43925000  | 1.53655800  |
| H  | 6.29935300 | 0.78475400  | 3.15141500  |
| H  | 7.20462000 | -0.20889500 | 1.97847200  |
| Cu | 2.49490000 | -1.03100000 | 0.29905900  |
| C  | 3.69717300 | -4.47617100 | -2.49508500 |
| H  | 3.07980900 | -5.34266600 | -2.24022200 |
| H  | 4.75182500 | -4.73438000 | -2.36213200 |
| H  | 3.52247600 | -4.20445300 | -3.54024800 |
| C  | 3.35425600 | -3.36870100 | -1.63905700 |
| N  | 3.07875500 | -2.48012200 | -0.95140000 |

#### **SMD-M06/6-31G(d,p)/SDD**

Electronic Energy (0K) = -2390.559106

Electronic Energy (0K) + ZPE = -2389.991419

Enthalpy (353K) = -2389.931119

Free Energy (353K) = -2390.096501

#### **SMD-M06/6-311++G(d,p)/SDD**

Electronic Energy (0K) = -2391.018720

#### **TS<sub>A5</sub>**

Number of imaginary frequencies: 1

|   |             |             |             |
|---|-------------|-------------|-------------|
| C | -0.65081600 | -0.44963800 | 1.18339500  |
| C | -0.73677700 | 0.78390700  | 0.75201100  |
| N | -0.23323000 | 1.82116700  | 0.08046600  |
| C | 0.06097800  | 1.75000900  | -1.38045200 |
| C | 1.44870600  | 1.43201200  | -1.66715900 |
| C | 2.61857200  | 1.16645800  | -1.85703100 |
| C | 3.94069600  | 0.67029500  | -2.04500000 |
| C | 5.04207800  | 1.52821500  | -2.13680000 |
| C | 4.13249800  | -0.73395100 | -2.12882100 |

|   |             |             |             |
|---|-------------|-------------|-------------|
| C | 6.32029800  | 1.01708500  | -2.30880500 |
| H | 4.87400800  | 2.60134300  | -2.07328500 |
| C | 5.42238900  | -1.23853000 | -2.30442000 |
| C | 6.49869100  | -0.36214200 | -2.39279800 |
| H | 7.17185900  | 1.68846600  | -2.37935200 |
| H | 5.56505400  | -2.31106600 | -2.36538700 |
| S | 0.24819500  | 3.27202200  | 0.92738200  |
| O | -0.81602900 | 3.56877000  | 1.87382000  |
| O | 0.58473000  | 4.20638900  | -0.13687100 |
| C | 1.69252700  | 2.80834600  | 1.81987400  |
| C | 1.55066200  | 2.28242100  | 3.10372200  |
| C | 2.93547800  | 2.90810000  | 1.19779700  |
| C | 2.68641200  | 1.84580300  | 3.76880700  |
| H | 0.57084000  | 2.22318900  | 3.57100900  |
| C | 4.05699200  | 2.46118400  | 1.88250500  |
| H | 3.02140100  | 3.32582000  | 0.19705400  |
| C | 3.94906200  | 1.91958300  | 3.16850200  |
| H | 2.59707900  | 1.43736800  | 4.77381600  |
| H | 5.03709400  | 2.53522000  | 1.41441800  |
| C | 5.15510200  | 1.39965400  | 3.88276000  |
| H | 6.08018900  | 1.80584000  | 3.46200700  |
| H | 5.12087200  | 1.63800200  | 4.95140600  |
| H | 5.20541600  | 0.30580300  | 3.80007600  |
| H | -0.60318200 | 0.97259700  | -1.78034700 |
| H | -0.22654700 | 2.70030700  | -1.84453500 |
| C | 0.61890300  | -1.19514400 | 1.30806500  |
| C | 0.56175300  | -2.56183400 | 1.62599900  |
| C | 1.88603200  | -0.62008900 | 1.11976700  |
| C | 1.71680900  | -3.32806200 | 1.73350100  |
| H | -0.41579200 | -3.02331500 | 1.77903200  |

|    |             |             |             |
|----|-------------|-------------|-------------|
| C  | 3.04214900  | -1.38217900 | 1.23324700  |
| H  | 1.97122000  | 0.43632700  | 0.87589000  |
| C  | 2.96348900  | -2.74072200 | 1.53488800  |
| H  | 1.64162000  | -4.38787900 | 1.96825900  |
| H  | 4.01198400  | -0.91264900 | 1.07246800  |
| H  | 3.86994600  | -3.33701300 | 1.61368300  |
| N  | 2.98899100  | -1.52180200 | -2.02377300 |
| H  | 2.15692300  | -0.99282500 | -1.78926400 |
| C  | 2.85768400  | -2.88545900 | -2.00551900 |
| O  | 3.79604000  | -3.66425600 | -2.10841200 |
| C  | 1.44737700  | -3.35682200 | -1.83331700 |
| C  | 1.26279400  | -4.68457400 | -1.44188500 |
| C  | 0.32718200  | -2.54093000 | -2.03166700 |
| C  | -0.01490700 | -5.18560000 | -1.22711700 |
| H  | 2.14146800  | -5.30904100 | -1.29780600 |
| C  | -0.95174800 | -3.04342200 | -1.81891600 |
| H  | 0.43063200  | -1.51467700 | -2.38551900 |
| C  | -1.12487300 | -4.36360600 | -1.40933100 |
| H  | -0.14666800 | -6.21888300 | -0.91490400 |
| H  | -1.81807400 | -2.40164900 | -1.98098000 |
| H  | -2.12617500 | -4.75531000 | -1.23950600 |
| H  | 7.49758400  | -0.77072900 | -2.52835900 |
| N  | -3.15683100 | -1.86025900 | 3.41208800  |
| C  | -3.59677000 | -2.14547900 | 4.44412800  |
| C  | -4.14328600 | -2.50260400 | 5.73030000  |
| H  | -3.61945000 | -3.37939600 | 6.12255000  |
| H  | -4.02092000 | -1.67047300 | 6.42972400  |
| H  | -5.20760200 | -2.73548400 | 5.63161000  |
| Cu | -2.31089600 | -1.37746000 | 1.66075200  |
| C  | -5.17602700 | -3.47605800 | -1.35147300 |

|    |             |             |             |
|----|-------------|-------------|-------------|
| H  | -6.05836400 | -2.84834300 | -1.51035200 |
| H  | -5.49617800 | -4.45887000 | -0.99286900 |
| H  | -4.64672100 | -3.59514900 | -2.30249600 |
| C  | -4.30610000 | -2.85740800 | -0.38056900 |
| N  | -3.59630600 | -2.35314300 | 0.38457700  |
| C  | -3.93230300 | 1.20176100  | -2.31997100 |
| C  | -3.91045200 | 2.55225400  | -2.65473100 |
| C  | -3.44451700 | 3.43856300  | -1.69243200 |
| C  | -3.00971600 | 2.99343700  | -0.45293100 |
| C  | -3.49349200 | 0.76543200  | -1.08672500 |
| H  | -4.25093600 | 2.89975200  | -3.62607800 |
| H  | -3.47547600 | -0.26988700 | -0.75924400 |
| N  | -3.03912200 | 1.66962400  | -0.18852000 |
| O  | -2.56477500 | 1.23511400  | 0.95789200  |
| H  | -2.64682700 | 3.62796800  | 0.35062200  |
| Cl | -3.38532600 | 5.13491000  | -2.02068100 |
| Cl | -4.50448800 | 0.01860600  | -3.44737500 |

**SMD-M06/6-31G(d,p)/SDD**

Electronic Energy (0K) = -3632.899140

Electronic Energy (0K) + ZPE = -3632.256794

Enthalpy (353K) = -3632.185348

Free Energy (353K) = -3632.376373

**SMD-M06/6-311++G(d,p)/SDD**

Electronic Energy (0K) = -3633.495118

**B5**

Number of imaginary frequencies: 0

|   |             |             |             |
|---|-------------|-------------|-------------|
| C | -0.23188400 | -1.60636100 | 0.67818600  |
| C | -1.00452500 | -1.45964300 | -0.42074300 |
| N | -0.44657100 | -1.45697600 | -1.71105000 |



|   |             |             |             |
|---|-------------|-------------|-------------|
| C | 0.97955900  | -1.17589300 | -1.98046700 |
| C | 1.45778600  | 0.05201600  | -1.35701400 |
| C | 1.86167700  | 1.07405500  | -0.84065900 |
| C | 2.38526800  | 2.23633300  | -0.20442700 |
| C | 1.65261300  | 3.42809400  | -0.20366900 |
| C | 3.65604900  | 2.19340700  | 0.41968100  |
| C | 2.15478100  | 4.57107200  | 0.40077300  |
| H | 0.67746300  | 3.42831100  | -0.68824000 |
| C | 4.15436400  | 3.34913200  | 1.02685700  |
| C | 3.40578400  | 4.52164800  | 1.01053500  |
| H | 1.57422800  | 5.49109200  | 0.39475000  |
| H | 5.12643400  | 3.31525300  | 1.50365900  |
| S | -1.45343200 | -0.91615100 | -2.98933700 |
| O | -2.82180200 | -1.32682900 | -2.67155000 |
| O | -0.83660300 | -1.38987800 | -4.22167200 |
| C | -1.35094800 | 0.85102500  | -2.94246700 |
| C | -2.09284600 | 1.55289100  | -1.99262000 |
| C | -0.44406000 | 1.50182400  | -3.77664300 |
| C | -1.90909700 | 2.92346900  | -1.87829700 |
| H | -2.80416700 | 1.03231500  | -1.35441400 |
| C | -0.27269100 | 2.87316300  | -3.64278400 |
| H | 0.12272500  | 0.93975400  | -4.51494100 |
| C | -0.99313900 | 3.60167800  | -2.69073800 |
| H | -2.48582200 | 3.48311000  | -1.14271600 |
| H | 0.44009600  | 3.39021800  | -4.28289700 |
| C | -0.78682400 | 5.07606600  | -2.53975800 |
| H | 0.25418100  | 5.35402000  | -2.73997700 |
| H | -1.41402600 | 5.63581300  | -3.24564000 |
| H | -1.04925800 | 5.41435100  | -1.53013700 |
| H | 1.57880200  | -2.02377200 | -1.62916800 |

|   |             |             |             |
|---|-------------|-------------|-------------|
| H | 1.12441800  | -1.14307400 | -3.06579200 |
| C | 1.13988300  | -2.04392900 | 0.98212400  |
| C | 1.66909900  | -3.19341200 | 0.37988000  |
| C | 1.92221700  | -1.36503800 | 1.92885600  |
| C | 2.95770700  | -3.62532500 | 0.68069000  |
| H | 1.05081500  | -3.75817700 | -0.31754700 |
| C | 3.20407400  | -1.80240300 | 2.23586000  |
| H | 1.52085400  | -0.47835100 | 2.41973600  |
| C | 3.72878700  | -2.93189700 | 1.60824900  |
| H | 3.35562000  | -4.51542100 | 0.19751200  |
| H | 3.80266500  | -1.25605600 | 2.96257500  |
| H | 4.73638900  | -3.26886800 | 1.84389300  |
| N | 4.34368900  | 0.97820300  | 0.36868900  |
| H | 3.79785100  | 0.20024900  | 0.01083200  |
| C | 5.64993100  | 0.71552900  | 0.70136600  |
| O | 6.37896500  | 1.51510200  | 1.27360800  |
| C | 6.13089300  | -0.64335900 | 0.30950200  |
| C | 7.21528700  | -1.16845500 | 1.01758000  |
| C | 5.57837700  | -1.37848500 | -0.74450800 |
| C | 7.72667500  | -2.41850500 | 0.69348900  |
| H | 7.64661200  | -0.57950600 | 1.82357500  |
| C | 6.10205400  | -2.62267400 | -1.07817800 |
| H | 4.75301500  | -0.97912500 | -1.33439800 |
| C | 7.17083000  | -3.14718200 | -0.35674000 |
| H | 8.56440500  | -2.82409100 | 1.25586200  |
| H | 5.67328500  | -3.18313700 | -1.90573500 |
| H | 7.57661800  | -4.12206300 | -0.61735400 |
| H | 3.81280200  | 5.40997700  | 1.48829800  |
| N | -4.00519800 | -3.24082200 | -0.23703900 |
| C | -4.46484600 | -4.30015300 | -0.32786000 |

|    |             |             |             |
|----|-------------|-------------|-------------|
| C  | -5.03585300 | -5.62051500 | -0.44549500 |
| H  | -5.12332100 | -5.89066900 | -1.50202000 |
| H  | -4.39356300 | -6.34956700 | 0.05716800  |
| H  | -6.02914800 | -5.64064600 | 0.01200900  |
| Cu | -2.96849900 | -1.42650000 | -0.30246100 |
| C  | -6.68540600 | 1.23489400  | 0.20392300  |
| H  | -6.44493200 | 2.12647800  | 0.79222000  |
| H  | -7.47424300 | 0.67163500  | 0.71158600  |
| H  | -7.04370300 | 1.54270600  | -0.78288900 |
| C  | -5.50910400 | 0.41155600  | 0.06330400  |
| N  | -4.55862500 | -0.24330000 | -0.03314500 |
| C  | -3.57802900 | 0.58496900  | 3.05477500  |
| C  | -3.13001400 | 1.85567600  | 2.72504800  |
| C  | -1.88861200 | 1.96857900  | 2.10547200  |
| C  | -1.13001200 | 0.84736900  | 1.81513200  |
| C  | -2.81278800 | -0.53234200 | 2.76452000  |
| H  | -3.72703400 | 2.73628200  | 2.94705600  |
| H  | -3.10041600 | -1.55740300 | 2.97740500  |
| N  | -1.62557100 | -0.35265000 | 2.16607900  |
| O  | -0.92441300 | -1.50355200 | 1.95863600  |
| H  | -0.16657000 | 0.86208700  | 1.30929600  |
| Cl | -1.25865800 | 3.52714400  | 1.71261900  |
| Cl | -5.11858000 | 0.35991700  | 3.79702100  |

**SMD-M06/6-31G(d,p)/SDD**

Electronic Energy (0K) = -3632.916711

Electronic Energy (0K) + ZPE = -3632.272618

Enthalpy (353K) = -3632.201100

Free Energy (353K) = -3632.392908

**SMD-M06/6-311++G(d,p)/SDD**

Electronic Energy (0K) = -3633.510838

**TS<sub>A5-1</sub>**

Number of imaginary frequencies: 1

|   |             |             |             |
|---|-------------|-------------|-------------|
| C | -0.20285600 | -1.40846500 | -0.15363800 |
| C | 0.70354800  | -1.28671200 | 0.76259300  |
| N | 0.45737800  | -0.99823400 | 2.10031400  |
| C | -0.88059700 | -0.53022900 | 2.51216400  |
| C | -1.32390700 | 0.64189500  | 1.76674100  |
| C | -1.65936700 | 1.60944200  | 1.11412100  |
| C | -2.12343300 | 2.70675400  | 0.33299700  |
| C | -1.38671200 | 3.89456500  | 0.27297900  |
| C | -3.34330100 | 2.59923400  | -0.37982000 |
| C | -1.83579500 | 4.96947200  | -0.47973900 |
| H | -0.45350500 | 3.94684100  | 0.83186600  |
| C | -3.78673400 | 3.68587800  | -1.13727700 |
| C | -3.03432500 | 4.85510000  | -1.17946800 |
| H | -1.25614500 | 5.88865400  | -0.52203500 |
| H | -4.71942400 | 3.60298900  | -1.68169700 |
| S | 1.76923100  | -0.41845900 | 3.02939000  |
| O | 2.92859200  | -1.21122200 | 2.62064600  |
| O | 1.31383200  | -0.44591400 | 4.41231700  |
| C | 2.02375100  | 1.25824700  | 2.53349300  |
| C | 2.80063500  | 1.53098800  | 1.40854300  |
| C | 1.38618200  | 2.27567800  | 3.24282900  |
| C | 2.93478000  | 2.85046100  | 0.99568300  |
| H | 3.31014100  | 0.72673600  | 0.87932700  |
| C | 1.53405700  | 3.58555900  | 2.81161100  |
| H | 0.79355700  | 2.04324300  | 4.12449800  |
| C | 2.30171100  | 3.89171100  | 1.68104800  |
| H | 3.55710100  | 3.08242100  | 0.13200200  |

|   |             |             |             |
|---|-------------|-------------|-------------|
| H | 1.04734500  | 4.39104000  | 3.35947400  |
| C | 2.42015500  | 5.30733900  | 1.21330000  |
| H | 1.46670200  | 5.66012300  | 0.79636900  |
| H | 2.66968100  | 5.98011500  | 2.04187100  |
| H | 3.18407000  | 5.41584200  | 0.43684300  |
| H | -1.58089900 | -1.36186200 | 2.35368600  |
| H | -0.86490300 | -0.33961400 | 3.59059000  |
| C | -1.45304600 | -1.95561600 | -0.59012300 |
| C | -1.92189200 | -3.12060900 | 0.04406300  |
| C | -2.23244300 | -1.36377900 | -1.59948000 |
| C | -3.14080300 | -3.67826700 | -0.32352000 |
| H | -1.30687000 | -3.58002900 | 0.81757000  |
| C | -3.44254300 | -1.93042200 | -1.96717300 |
| H | -1.87125100 | -0.46632900 | -2.09752900 |
| C | -3.89399700 | -3.09148300 | -1.33661000 |
| H | -3.49862100 | -4.57733500 | 0.17302300  |
| H | -4.04274600 | -1.46752400 | -2.74759100 |
| H | -4.84394900 | -3.53219500 | -1.63126900 |
| N | -4.04022100 | 1.39424400  | -0.25993200 |
| H | -3.52527700 | 0.65666000  | 0.21062400  |
| C | -5.33382800 | 1.11144400  | -0.62379900 |
| O | -6.02513400 | 1.85742300  | -1.30462800 |
| C | -5.85097200 | -0.19730800 | -0.12190000 |
| C | -6.92884700 | -0.76177300 | -0.80941200 |
| C | -5.33974400 | -0.84683200 | 1.00694500  |
| C | -7.47521500 | -1.96789700 | -0.39082600 |
| H | -7.32670500 | -0.23715600 | -1.67483500 |
| C | -5.89548900 | -2.04886600 | 1.43107200  |
| H | -4.52735300 | -0.40780600 | 1.58621000  |
| C | -6.95843700 | -2.61358600 | 0.73091900  |

|    |             |             |             |
|----|-------------|-------------|-------------|
| H  | -8.30893300 | -2.40432200 | -0.93582500 |
| H  | -5.49924600 | -2.54340700 | 2.31501100  |
| H  | -7.39014000 | -3.55444600 | 1.06480700  |
| H  | -3.39657600 | 5.69010400  | -1.77498000 |
| N  | 2.07997100  | -4.07551900 | 0.05240900  |
| C  | 1.60093900  | -5.09741100 | -0.20970400 |
| C  | 1.00290100  | -6.36989700 | -0.53478500 |
| H  | 1.01404700  | -7.02010600 | 0.34494400  |
| H  | -0.03190700 | -6.22103400 | -0.85780800 |
| H  | 1.56440900  | -6.85020200 | -1.34127100 |
| Cu | 2.49935900  | -2.04773400 | 0.35929100  |
| C  | 6.99700000  | -1.72515800 | -0.31810200 |
| H  | 7.32497900  | -0.68190100 | -0.35317000 |
| H  | 7.29693900  | -2.22879100 | -1.24228200 |
| H  | 7.47449100  | -2.22261100 | 0.53134700  |
| C  | 5.56347900  | -1.78619800 | -0.17240000 |
| N  | 4.41311100  | -1.83909900 | -0.05485600 |
| C  | 3.59619700  | 0.42566600  | -2.67213300 |
| C  | 3.17489600  | 1.74053400  | -2.53444500 |
| C  | 1.84756700  | 1.94161000  | -2.17439900 |
| C  | 0.98831100  | 0.87956200  | -1.95812800 |
| C  | 2.73046300  | -0.63438100 | -2.46810400 |
| H  | 3.84778000  | 2.57530700  | -2.70956400 |
| H  | 2.99508500  | -1.68004100 | -2.58353900 |
| N  | 1.44154000  | -0.38638000 | -2.13502000 |
| O  | 0.63531400  | -1.39511500 | -1.97090100 |
| H  | -0.05395700 | 0.98304900  | -1.67481600 |
| Cl | 1.23056000  | 3.54795500  | -2.00421100 |
| Cl | 5.23449800  | 0.07729700  | -3.11273600 |

**SMD-M06/6-31G(d,p)/SDD**

Electronic Energy (0K) = -3632.895149

Electronic Energy (0K) + ZPE = -3632.253276

Enthalpy (353K) = -3632.181884

Free Energy (353K) = -3632.371634

**SMD-M06/6-311++G(d,p)/SDD**

Electronic Energy (0K) = -3633.493394

**B5-1**

Number of imaginary frequencies: 0

|   |             |             |             |
|---|-------------|-------------|-------------|
| C | 0.21690700  | -1.41753300 | -0.82322200 |
| C | 0.99386400  | -1.40109600 | 0.28182000  |
| N | 0.44969500  | -1.50926300 | 1.57515700  |
| C | -0.97534300 | -1.27024500 | 1.88763000  |
| C | -1.48740900 | -0.01120600 | 1.36269000  |
| C | -1.91341100 | 1.02992200  | 0.90667700  |
| C | -2.45693400 | 2.21741500  | 0.33874000  |
| C | -1.71788500 | 3.40497800  | 0.35688300  |
| C | -3.74600200 | 2.20034100  | -0.24779100 |
| C | -2.23262500 | 4.56982100  | -0.19304800 |
| H | -0.72868500 | 3.38428800  | 0.81289600  |
| C | -4.25898500 | 3.37947200  | -0.79446100 |
| C | -3.50387200 | 4.54739600  | -0.76144000 |
| H | -1.64628100 | 5.48610700  | -0.17927000 |
| H | -5.24582600 | 3.36625300  | -1.24106100 |
| S | 1.48157800  | -1.02998700 | 2.85999000  |
| O | 2.82702500  | -1.51008600 | 2.54001700  |
| O | 0.84111600  | -1.48182900 | 4.08865900  |
| C | 1.47880600  | 0.74040900  | 2.82794300  |
| C | 2.32390000  | 1.41398300  | 1.94743800  |
| C | 0.55443800  | 1.42941500  | 3.61289300  |

|   |             |             |             |
|---|-------------|-------------|-------------|
| C | 2.22781900  | 2.79639300  | 1.85122300  |
| H | 3.05268700  | 0.86557900  | 1.35328100  |
| C | 0.47562500  | 2.80993600  | 3.50128000  |
| H | -0.09008700 | 0.89048000  | 4.30320400  |
| C | 1.30094200  | 3.51235300  | 2.61473500  |
| H | 2.89034400  | 3.33473500  | 1.17429000  |
| H | -0.24225600 | 3.35852800  | 4.10912300  |
| C | 1.16520100  | 4.99511400  | 2.47122900  |
| H | 0.22259200  | 5.24841000  | 1.96512200  |
| H | 1.14077700  | 5.49076100  | 3.44846600  |
| H | 1.98552800  | 5.42296600  | 1.88612100  |
| H | -1.56624300 | -2.10057600 | 1.48444900  |
| H | -1.09893800 | -1.31960600 | 2.97450200  |
| C | -1.15844500 | -1.80533700 | -1.16971800 |
| C | -1.71172400 | -2.98998900 | -0.66377000 |
| C | -1.92394900 | -1.04036600 | -2.06364700 |
| C | -3.01035500 | -3.36669500 | -0.99365600 |
| H | -1.10381300 | -3.62822300 | -0.02303500 |
| C | -3.21635900 | -1.42144000 | -2.39869000 |
| H | -1.50158900 | -0.13144400 | -2.49180800 |
| C | -3.76820700 | -2.58269100 | -1.85795000 |
| H | -3.42581300 | -4.28579900 | -0.58541000 |
| H | -3.80187200 | -0.80615800 | -3.07940900 |
| H | -4.78358500 | -2.87713300 | -2.11626400 |
| N | -4.43249900 | 0.98362400  | -0.22839600 |
| H | -3.87314700 | 0.18815200  | 0.06507600  |
| C | -5.74599900 | 0.73235200  | -0.54003400 |
| O | -6.49554100 | 1.55824800  | -1.04438600 |
| C | -6.20498800 | -0.65184400 | -0.21765200 |
| C | -7.29167700 | -1.15238900 | -0.93951100 |



|    |             |             |             |
|----|-------------|-------------|-------------|
| C  | -5.62348700 | -1.43797700 | 0.78276000  |
| C  | -7.77384000 | -2.43018400 | -0.68620000 |
| H  | -7.74591100 | -0.52393600 | -1.70195800 |
| C  | -6.11875200 | -2.71024200 | 1.04675200  |
| H  | -4.79772200 | -1.05773400 | 1.38458200  |
| C  | -7.18706600 | -3.21127600 | 0.30791200  |
| H  | -8.61220800 | -2.81724200 | -1.26057700 |
| H  | -5.66848000 | -3.31133600 | 1.83331900  |
| H  | -7.56893000 | -4.20899800 | 0.51220300  |
| H  | -3.92102700 | 5.45358000  | -1.19479600 |
| N  | 3.60591700  | -3.56661600 | 0.07586400  |
| C  | 3.82636200  | -4.70179500 | 0.14649300  |
| C  | 4.10242700  | -6.11587400 | 0.23679500  |
| H  | 4.19632800  | -6.40737700 | 1.28701100  |
| H  | 3.28675600  | -6.68389500 | -0.21988300 |
| H  | 5.03619000  | -6.34789700 | -0.28367200 |
| Cu | 2.95476000  | -1.54237100 | 0.17154800  |
| C  | 7.15337900  | 0.21855100  | -0.19018900 |
| H  | 7.13724100  | 1.29533200  | -0.38440800 |
| H  | 7.69715600  | -0.28380500 | -0.99607800 |
| H  | 7.66741900  | 0.03268700  | 0.75770300  |
| C  | 5.80578300  | -0.29164900 | -0.12079800 |
| N  | 4.72471300  | -0.70368800 | -0.06757100 |
| C  | 3.67017400  | 0.94273600  | -2.79879100 |
| C  | 3.22086600  | 2.18684800  | -2.38373100 |
| C  | 1.93565000  | 2.27451600  | -1.85398600 |
| C  | 1.14007100  | 1.14973600  | -1.71839400 |
| C  | 2.86549300  | -0.17793000 | -2.66772600 |
| H  | 3.84466600  | 3.07169900  | -2.47917000 |
| H  | 3.14564000  | -1.18572900 | -2.95777400 |

|    |            |             |             |
|----|------------|-------------|-------------|
| N  | 1.64160100 | -0.02529800 | -2.14125000 |
| O  | 0.90128700 | -1.16748600 | -2.09134100 |
| H  | 0.13825500 | 1.14488800  | -1.29358200 |
| Cl | 1.30564900 | 3.81242000  | -1.39073800 |
| Cl | 5.25247500 | 0.74789500  | -3.45767700 |

**SMD-M06/6-31G(d,p)/SDD**

Electronic Energy (0K) = -3632.915922

Electronic Energy (0K) + ZPE = -3632.272020

Enthalpy (353K) = -3632.200622

Free Energy (353K) = -3632.392584

**SMD-M06/6-311++G(d,p)/SDD**

Electronic Energy (0K) = -3633.510572

**A6**

Number of imaginary frequencies: 0

|   |             |             |             |
|---|-------------|-------------|-------------|
| C | 0.20439700  | -2.11159600 | -1.42069100 |
| C | -0.55151900 | -1.33689100 | -1.97354700 |
| N | -1.38478900 | -0.45372700 | -2.55971300 |
| C | -1.12380500 | 0.98019300  | -2.32456300 |
| C | -0.96675900 | 1.27699800  | -0.89087900 |
| C | -0.97540000 | 1.05506200  | 0.33065200  |
| C | -0.92050100 | 0.63142500  | 1.69405000  |
| C | -1.96631700 | 0.89786000  | 2.58529800  |
| C | 0.25310300  | -0.01783400 | 2.15117700  |
| C | -1.86395500 | 0.52045200  | 3.91612700  |
| H | -2.85315500 | 1.40766700  | 2.21405600  |
| C | 0.33718100  | -0.40884700 | 3.48895200  |
| C | -0.71408800 | -0.13303700 | 4.35645700  |
| H | -2.67479800 | 0.73468200  | 4.60757700  |
| H | 1.23044900  | -0.91561100 | 3.83476400  |

|   |             |             |             |
|---|-------------|-------------|-------------|
| S | -3.03012200 | -0.95330600 | -2.73294500 |
| O | -2.95431700 | -2.33988500 | -3.15526400 |
| O | -3.63933800 | 0.06967800  | -3.56874000 |
| C | -3.71175300 | -0.86147000 | -1.10922200 |
| C | -3.44163500 | -1.88519900 | -0.19995400 |
| C | -4.46151100 | 0.25725300  | -0.75088000 |
| C | -3.94318800 | -1.77729600 | 1.08918000  |
| H | -2.86286700 | -2.75570900 | -0.50011400 |
| C | -4.96178200 | 0.33758500  | 0.54112400  |
| H | -4.65762100 | 1.04181000  | -1.47769700 |
| C | -4.71275200 | -0.67389700 | 1.47527800  |
| H | -3.74032400 | -2.56528100 | 1.81256800  |
| H | -5.55813100 | 1.20001300  | 0.83488800  |
| C | -5.27281000 | -0.58476300 | 2.85910600  |
| H | -5.37703800 | 0.45656500  | 3.18425400  |
| H | -6.27217300 | -1.03729200 | 2.90082000  |
| H | -4.64435400 | -1.11798700 | 3.58058600  |
| H | -0.20869100 | 1.24532500  | -2.86867200 |
| H | -1.93876500 | 1.55894300  | -2.77322800 |
| C | 1.08323400  | -3.00271600 | -0.73403500 |
| C | 2.23123800  | -3.50663300 | -1.36195000 |
| C | 0.82288400  | -3.34133200 | 0.60398100  |
| C | 3.10471500  | -4.32713100 | -0.65930600 |
| H | 2.43219600  | -3.23765200 | -2.39691400 |
| C | 1.70053000  | -4.16129300 | 1.29979000  |
| H | -0.06967000 | -2.94322500 | 1.08563100  |
| C | 2.84308600  | -4.65294800 | 0.66981500  |
| H | 3.99752200  | -4.70914600 | -1.14914900 |
| H | 1.49573900  | -4.41591600 | 2.33716200  |
| H | 3.53158300  | -5.29235300 | 1.21760400  |

|    |             |             |             |
|----|-------------|-------------|-------------|
| N  | 1.27125500  | -0.22506100 | 1.22058000  |
| H  | 0.98073600  | -0.19535200 | 0.24833200  |
| C  | 2.60627200  | -0.45242600 | 1.45668000  |
| O  | 3.07825400  | -0.61815700 | 2.57296500  |
| C  | 3.44720200  | -0.48706800 | 0.22447200  |
| C  | 4.63480600  | -1.21999400 | 0.27985000  |
| C  | 3.10729800  | 0.18588300  | -0.95504900 |
| C  | 5.45767900  | -1.30637300 | -0.83591300 |
| H  | 4.89059200  | -1.73048400 | 1.20565500  |
| C  | 3.93793400  | 0.10731100  | -2.06730900 |
| H  | 2.20420200  | 0.79716900  | -1.00910700 |
| C  | 5.10877000  | -0.64502100 | -2.01129800 |
| H  | 6.37288000  | -1.89190700 | -0.79084500 |
| H  | 3.67252500  | 0.63887800  | -2.97840700 |
| H  | 5.75399500  | -0.70998800 | -2.88438000 |
| H  | -0.63175300 | -0.44075500 | 5.39628900  |
| N  | 0.96920000  | 3.81368800  | -1.61349800 |
| C  | 1.44105800  | 4.42948800  | -2.47148700 |
| C  | 2.02948500  | 5.20001600  | -3.53703600 |
| H  | 1.59841700  | 6.20547400  | -3.54455500 |
| H  | 3.11018300  | 5.27388600  | -3.38385300 |
| H  | 1.83211300  | 4.71570300  | -4.49789100 |
| Cu | 0.20130500  | 2.73357100  | -0.15190300 |
| C  | 2.02517300  | 3.27246100  | 3.96384300  |
| H  | 2.61571700  | 2.36127100  | 4.10328400  |
| H  | 1.21562800  | 3.29175800  | 4.70017100  |
| H  | 2.66773300  | 4.14607300  | 4.10602200  |
| C  | 1.46844500  | 3.27641300  | 2.63520900  |
| N  | 1.01778500  | 3.25964900  | 1.56952200  |

**SMD-M06/6-31G(d,p)/SDD**

Electronic Energy (0K) = -2390.555090

Electronic Energy (0K) + ZPE = -2389.986845

Enthalpy (353K) = -2389.926886

Free Energy (353K) = -2390.091955

**SMD-M06/6-311++G(d,p)/SDD**

Electronic Energy (0K) = -2391.018365

**TS<sub>A6</sub>**

Number of imaginary frequencies: 1

|   |             |             |             |
|---|-------------|-------------|-------------|
| C | -0.95819100 | -1.69365100 | -2.37240900 |
| C | -1.59461500 | -0.68831900 | -2.11932400 |
| N | -2.27944600 | 0.42741900  | -1.82862600 |
| C | -1.55894200 | 1.70678800  | -1.62498200 |
| C | -0.75886900 | 1.86234000  | -0.37432900 |
| C | -0.68428700 | 1.06536600  | 0.63629200  |
| C | -1.02193100 | -0.12772600 | 1.37053700  |
| C | -2.02854300 | -0.07690100 | 2.34597900  |
| C | -0.27385600 | -1.31983600 | 1.20959700  |
| C | -2.29584500 | -1.17369700 | 3.14891700  |
| H | -2.58179700 | 0.85222600  | 2.46849800  |
| C | -0.56135500 | -2.42900800 | 2.01152300  |
| C | -1.55712600 | -2.34504000 | 2.97604000  |
| H | -3.07486500 | -1.12000400 | 3.90607200  |
| H | 0.01796000  | -3.33670700 | 1.88551400  |
| S | -3.98545500 | 0.34838700  | -1.88995200 |
| O | -4.32423100 | -0.47312500 | -3.04197000 |
| O | -4.43896000 | 1.72898000  | -1.79331100 |
| C | -4.45696300 | -0.52370900 | -0.42858200 |
| C | -4.23261600 | -1.90032200 | -0.35470800 |
| C | -5.06855100 | 0.17222500  | 0.60864900  |

|   |             |             |             |
|---|-------------|-------------|-------------|
| C | -4.62239700 | -2.57563000 | 0.79042600  |
| H | -3.77329500 | -2.43363000 | -1.18381000 |
| C | -5.47041500 | -0.53045600 | 1.73892300  |
| H | -5.23824900 | 1.24260200  | 0.52360200  |
| C | -5.25018500 | -1.90494100 | 1.84811400  |
| H | -4.44459300 | -3.64730500 | 0.86964300  |
| H | -5.95779200 | -0.00088700 | 2.55593400  |
| C | -5.67190100 | -2.66123800 | 3.06779600  |
| H | -5.94229900 | -1.98824800 | 3.88793900  |
| H | -6.54269200 | -3.29428700 | 2.85449700  |
| H | -4.87232200 | -3.32771800 | 3.41403100  |
| H | -0.90209000 | 1.83877000  | -2.49517600 |
| H | -2.30480200 | 2.50778400  | -1.67965900 |
| C | -0.19063500 | -2.88313200 | -2.54915600 |
| C | 0.71513300  | -2.99955400 | -3.61402400 |
| C | -0.28857900 | -3.92503200 | -1.61266700 |
| C | 1.51731000  | -4.12771200 | -3.72767000 |
| H | 0.79237200  | -2.18905900 | -4.33606700 |
| C | 0.50744500  | -5.05569200 | -1.74022800 |
| H | -0.98842600 | -3.82542300 | -0.78348800 |
| C | 1.41534700  | -5.15626500 | -2.79328300 |
| H | 2.22780800  | -4.20410500 | -4.54777400 |
| H | 0.42759400  | -5.85751200 | -1.00969100 |
| H | 2.04542900  | -6.03812500 | -2.88440600 |
| N | 0.72685000  | -1.33285100 | 0.23231400  |
| H | 0.55703800  | -0.71158500 | -0.55013800 |
| C | 1.86468400  | -2.09915800 | 0.20079300  |
| O | 2.13463800  | -2.93419900 | 1.05509900  |
| C | 2.78023100  | -1.82318600 | -0.94858200 |
| C | 3.79855900  | -2.75271800 | -1.17531600 |

|    |             |             |             |
|----|-------------|-------------|-------------|
| C  | 2.68649900  | -0.69782200 | -1.77704800 |
| C  | 4.70116000  | -2.57167900 | -2.21531400 |
| H  | 3.86093400  | -3.62065600 | -0.52333400 |
| C  | 3.58895000  | -0.51905200 | -2.81927100 |
| H  | 1.92214700  | 0.06522100  | -1.62249700 |
| C  | 4.59637200  | -1.45480700 | -3.04065300 |
| H  | 5.48631300  | -3.30462900 | -2.38509700 |
| H  | 3.50879700  | 0.35834200  | -3.45669100 |
| H  | 5.30190800  | -1.31141200 | -3.85588600 |
| H  | -1.76367300 | -3.21284200 | 3.59906200  |
| Cu | 0.17455400  | 3.58957100  | -0.32119500 |
| C  | 4.35987300  | 5.42477200  | -0.29323400 |
| H  | 4.28411400  | 6.50551800  | -0.14128400 |
| H  | 4.86139900  | 5.22956600  | -1.24588100 |
| H  | 4.95029300  | 4.98877400  | 0.51844200  |
| C  | 3.04293400  | 4.83839100  | -0.30665500 |
| N  | 1.98659700  | 4.36334000  | -0.31521600 |
| C  | 2.60818000  | -0.58663700 | 3.25036900  |
| C  | 3.73872800  | -0.42754800 | 2.46113200  |
| C  | 3.71533900  | 0.58318100  | 1.50582500  |
| C  | 2.59523700  | 1.37215500  | 1.32722000  |
| C  | 1.49564300  | 0.22215700  | 3.08157800  |
| H  | 4.60985500  | -1.06329300 | 2.58944500  |
| H  | 0.59424100  | 0.16199900  | 3.68217000  |
| N  | 1.51361400  | 1.16796900  | 2.11617600  |
| O  | 0.42816700  | 1.88944900  | 1.90914000  |
| H  | 2.50243900  | 2.16570100  | 0.59184100  |
| Cl | 5.09590100  | 0.86768900  | 0.50268200  |
| Cl | 2.55126900  | -1.81610500 | 4.46075800  |
| C  | -2.64340100 | 7.23345000  | -1.03454800 |

|   |             |            |             |
|---|-------------|------------|-------------|
| H | -2.07854700 | 8.12625300 | -1.31836900 |
| H | -3.22950200 | 7.45045000 | -0.13664800 |
| H | -3.32270800 | 6.96425300 | -1.84859000 |
| C | -1.73749900 | 6.14155000 | -0.77296800 |
| N | -1.00934100 | 5.26569200 | -0.56279100 |

**SMD-M06/6-31G(d,p)/SDD**

Electronic Energy (0K) = -3632.890725

Electronic Energy (0K) + ZPE = -3632.248939

Enthalpy (353K) = -3632.177293

Free Energy (353K) = -3632.368693

**SMD-M06/6-311++G(d,p)/SDD**

Electronic Energy (0K) = -3633.490385

**B6**

Number of imaginary frequencies: 0

|   |             |             |             |
|---|-------------|-------------|-------------|
| C | -1.12363700 | -1.16626700 | -2.40522500 |
| C | -1.59328500 | -0.16882800 | -1.89111200 |
| N | -2.07591300 | 0.94108000  | -1.30931200 |
| C | -1.14543000 | 2.08363500  | -1.08712600 |
| C | -0.21703400 | 2.04821500  | 0.07988500  |
| C | -0.24227100 | 1.15830400  | 1.07007400  |
| C | -0.97380700 | -0.07917500 | 1.43204400  |
| C | -2.03252600 | -0.01075500 | 2.34269900  |
| C | -0.47582200 | -1.34759300 | 1.06612500  |
| C | -2.57948000 | -1.16270800 | 2.89519900  |
| H | -2.40371600 | 0.97075900  | 2.63506900  |
| C | -1.02752800 | -2.50644100 | 1.61866300  |
| C | -2.06561900 | -2.40704400 | 2.53675000  |
| H | -3.39730500 | -1.09005300 | 3.60907000  |
| H | -0.61877900 | -3.47221900 | 1.34049400  |



|   |             |             |             |
|---|-------------|-------------|-------------|
| S | -3.76320600 | 1.20758500  | -1.47951000 |
| O | -4.15302600 | 0.76727700  | -2.81156000 |
| O | -3.98526500 | 2.58747600  | -1.06276100 |
| C | -4.48668400 | 0.11978600  | -0.29218200 |
| C | -4.47681500 | -1.25620500 | -0.53074300 |
| C | -5.08136100 | 0.65986900  | 0.84267300  |
| C | -5.05320300 | -2.09536900 | 0.40895300  |
| H | -4.03516300 | -1.66134500 | -1.43824400 |
| C | -5.67557700 | -0.20023100 | 1.75873100  |
| H | -5.08539100 | 1.73526000  | 0.99978600  |
| C | -5.65946100 | -1.58233400 | 1.56328600  |
| H | -5.04363400 | -3.17210200 | 0.24541700  |
| H | -6.15290800 | 0.20850400  | 2.64775200  |
| C | -6.25229900 | -2.51335000 | 2.57244600  |
| H | -6.76791300 | -1.97118900 | 3.37126000  |
| H | -6.96676000 | -3.20280800 | 2.10721500  |
| H | -5.47040000 | -3.13179400 | 3.03286400  |
| H | -0.56705000 | 2.20986900  | -2.01417100 |
| H | -1.77020200 | 2.97964000  | -1.00040900 |
| C | -0.56204200 | -2.40444900 | -2.83785700 |
| C | 0.34126800  | -2.45396300 | -3.90982700 |
| C | -0.87404400 | -3.58640300 | -2.14604100 |
| C | 0.92776200  | -3.65998700 | -4.27238500 |
| H | 0.58254700  | -1.53737600 | -4.44454900 |
| C | -0.29005600 | -4.78931200 | -2.52005900 |
| H | -1.57406800 | -3.54021500 | -1.31249300 |
| C | 0.61431000  | -4.82778200 | -3.57998900 |
| H | 1.63415200  | -3.68887800 | -5.09898300 |
| H | -0.53614300 | -5.70026800 | -1.97927000 |
| H | 1.07589900  | -5.77003100 | -3.86638600 |

|    |             |             |             |
|----|-------------|-------------|-------------|
| N  | 0.58460800  | -1.39277200 | 0.14289800  |
| H  | 0.53147900  | -0.69522200 | -0.58827600 |
| C  | 1.58082700  | -2.32606700 | 0.04922800  |
| O  | 1.68908400  | -3.27633000 | 0.81605300  |
| C  | 2.56716800  | -2.07860900 | -1.04776100 |
| C  | 3.44223900  | -3.12268200 | -1.35764200 |
| C  | 2.67373800  | -0.86846200 | -1.74495000 |
| C  | 4.39456300  | -2.97183600 | -2.35774100 |
| H  | 3.35301800  | -4.05407000 | -0.80363600 |
| C  | 3.62597500  | -0.71936300 | -2.74673700 |
| H  | 2.02976000  | -0.01791200 | -1.51607500 |
| C  | 4.48539000  | -1.77059800 | -3.05645800 |
| H  | 5.06530000  | -3.79394400 | -2.59594700 |
| H  | 3.70082600  | 0.22379400  | -3.28293400 |
| H  | 5.22943200  | -1.65099900 | -3.84076000 |
| H  | -2.48056800 | -3.31462100 | 2.97040000  |
| Cu | 1.09517800  | 3.44874100  | 0.02853000  |
| C  | 4.66692000  | 6.15557100  | -0.25304100 |
| H  | 4.56028900  | 6.98164800  | 0.45637900  |
| H  | 4.72253700  | 6.55915400  | -1.26835800 |
| H  | 5.58784600  | 5.60795500  | -0.03189900 |
| C  | 3.53376400  | 5.27299600  | -0.14402900 |
| N  | 2.62118600  | 4.56734400  | -0.06017600 |
| C  | 2.56615800  | -1.36012100 | 3.24120600  |
| C  | 3.71500800  | -1.21444600 | 2.47343300  |
| C  | 3.81699000  | -0.10732600 | 1.63516300  |
| C  | 2.78084100  | 0.80464600  | 1.54661400  |
| C  | 1.54126900  | -0.42995300 | 3.16096700  |
| H  | 4.51729000  | -1.94579100 | 2.52876600  |
| H  | 0.62107200  | -0.46778000 | 3.73596500  |

|    |             |             |             |
|----|-------------|-------------|-------------|
| N  | 1.69026100  | 0.59397300  | 2.30529400  |
| O  | 0.66178400  | 1.49228200  | 2.19704900  |
| H  | 2.75751200  | 1.68661200  | 0.90637300  |
| Cl | 5.23173600  | 0.13627300  | 0.67973300  |
| Cl | 2.37387700  | -2.71119500 | 4.28948800  |
| C  | -2.93557200 | 5.85923300  | -1.27703600 |
| H  | -3.03200400 | 6.32023900  | -2.26436500 |
| H  | -3.39241900 | 6.51629600  | -0.53124600 |
| H  | -3.46226800 | 4.89748900  | -1.27838600 |
| C  | -1.54029700 | 5.64645500  | -0.96251100 |
| N  | -0.42289000 | 5.45155700  | -0.70938400 |

**SMD-M06/6-31G(d,p)/SDD**

Electronic Energy (0K) = -3632.901844

Electronic Energy (0K) + ZPE = -3632.257883

Enthalpy (353K) = -3632.186302

Free Energy (353K) = -3632.377153

**SMD-M06/6-311++G(d,p)/SDD**

Electronic Energy (0K) = -3633.500339

**TS<sub>A6-1</sub>**

Number of imaginary frequencies: 1

|   |             |             |             |
|---|-------------|-------------|-------------|
| C | -0.97335900 | -2.20457900 | -1.54792900 |
| C | -1.59083400 | -1.30161400 | -2.08031600 |
| N | -2.40780200 | -0.39353500 | -2.64576600 |
| C | -2.08809700 | 1.06047800  | -2.57890600 |
| C | -1.09731200 | 1.35941300  | -1.56615700 |
| C | -0.63433900 | 1.55337300  | -0.41490800 |
| C | -1.36338900 | 1.79968400  | 0.84747900  |
| C | -2.23088400 | 2.89783200  | 0.92230600  |
| C | -1.20876100 | 0.96434500  | 1.96733300  |

|   |             |             |             |
|---|-------------|-------------|-------------|
| C | -2.91846600 | 3.18005500  | 2.09448900  |
| H | -2.33835900 | 3.53554500  | 0.04615300  |
| C | -1.93046900 | 1.23959200  | 3.13118900  |
| C | -2.76400400 | 2.34824100  | 3.20118300  |
| H | -3.57846900 | 4.04317000  | 2.14011700  |
| H | -1.82139800 | 0.57867700  | 3.98476700  |
| S | -4.09016600 | -0.78595300 | -2.54839600 |
| O | -4.17986000 | -2.19630000 | -2.87878000 |
| O | -4.75407800 | 0.22906000  | -3.35154800 |
| C | -4.48675000 | -0.54091700 | -0.84574100 |
| C | -4.11880800 | -1.51559800 | 0.08427500  |
| C | -5.11374400 | 0.64038500  | -0.45383400 |
| C | -4.38903400 | -1.29042800 | 1.42627200  |
| H | -3.65041000 | -2.44158500 | -0.24090000 |
| C | -5.38610400 | 0.83697500  | 0.89332700  |
| H | -5.39763700 | 1.38322900  | -1.19527300 |
| C | -5.03592700 | -0.12243400 | 1.84854000  |
| H | -4.11014100 | -2.04183000 | 2.16372900  |
| H | -5.88601000 | 1.74994300  | 1.21324200  |
| C | -5.38238500 | 0.07714800  | 3.28948000  |
| H | -5.42248200 | 1.14071700  | 3.54853600  |
| H | -6.37040200 | -0.34971300 | 3.50729300  |
| H | -4.66357700 | -0.41903600 | 3.95063300  |
| H | -1.80750100 | 1.42232200  | -3.57134800 |
| H | -2.99545300 | 1.60962900  | -2.28313300 |
| C | -0.32070300 | -3.29634700 | -0.89926800 |
| C | 0.59424600  | -4.10823400 | -1.58691400 |
| C | -0.62974800 | -3.59295300 | 0.43924900  |
| C | 1.18252800  | -5.19233200 | -0.94753800 |
| H | 0.82385900  | -3.88810500 | -2.62782400 |

|    |             |             |             |
|----|-------------|-------------|-------------|
| C  | -0.05469500 | -4.69083400 | 1.06474800  |
| H  | -1.32838500 | -2.95163300 | 0.97644000  |
| C  | 0.85390900  | -5.48960100 | 0.37387300  |
| H  | 1.89282000  | -5.81537500 | -1.48645600 |
| H  | -0.30419000 | -4.91610900 | 2.09929000  |
| H  | 1.31112100  | -6.34394500 | 0.86817700  |
| N  | -0.34444900 | -0.15331900 | 1.90048800  |
| H  | -0.29987800 | -0.66164500 | 1.02232300  |
| C  | 0.54847900  | -0.46746300 | 2.89647800  |
| O  | 0.57531000  | 0.12317900  | 3.96896100  |
| C  | 1.50621500  | -1.57878600 | 2.61882400  |
| C  | 1.95313700  | -2.30596700 | 3.72640900  |
| C  | 2.03339400  | -1.85973800 | 1.35400000  |
| C  | 2.89726800  | -3.31329200 | 3.57681500  |
| H  | 1.54876400  | -2.06272200 | 4.70609300  |
| C  | 3.00096400  | -2.84994200 | 1.21224400  |
| H  | 1.71580500  | -1.29420800 | 0.47539000  |
| C  | 3.42878100  | -3.58090600 | 2.31775600  |
| H  | 3.22620100  | -3.88232400 | 4.44312000  |
| H  | 3.41652000  | -3.06243500 | 0.23062200  |
| H  | 4.17783700  | -4.36014600 | 2.19527600  |
| H  | -3.30402800 | 2.55397400  | 4.12255800  |
| N  | 1.21150400  | 4.14741800  | 0.14563100  |
| C  | 1.12369000  | 5.30168900  | 0.14086200  |
| C  | 1.01371800  | 6.73951700  | 0.13668800  |
| H  | 0.94417700  | 7.10718900  | 1.16457000  |
| H  | 1.89465500  | 7.17716400  | -0.34190300 |
| H  | 0.11813600  | 7.04150500  | -0.41420500 |
| Cu | 1.21698800  | 2.09032500  | 0.17200800  |
| C  | 4.39775000  | 0.45450600  | 2.97313100  |

|    |            |             |             |
|----|------------|-------------|-------------|
| H  | 3.89635500 | 0.31856100  | 3.93708000  |
| H  | 5.23466200 | 1.14823000  | 3.09631500  |
| H  | 4.77497500 | -0.51210800 | 2.62348700  |
| C  | 3.45538100 | 0.98128500  | 2.01897500  |
| N  | 2.68542600 | 1.39318500  | 1.25949300  |
| C  | 3.31417000 | -0.69494600 | -2.27098800 |
| C  | 4.18028200 | 0.31550000  | -1.86316000 |
| C  | 3.68647100 | 1.61050600  | -1.89849800 |
| C  | 2.39503000 | 1.88466900  | -2.32576400 |
| C  | 2.01807600 | -0.42732600 | -2.66622300 |
| H  | 5.19860000 | 0.10062400  | -1.55309300 |
| H  | 1.29708800 | -1.17128200 | -2.99135800 |
| N  | 1.58995600 | 0.86199400  | -2.72036800 |
| O  | 0.39881100 | 1.11580800  | -3.12500100 |
| H  | 1.97910400 | 2.88106900  | -2.43762600 |
| Cl | 4.68151700 | 2.93836900  | -1.40710900 |
| Cl | 3.86669900 | -2.33551100 | -2.34171800 |

**SMD-M06/6-31G(d,p)/SDD**

Electronic Energy (0K) = -3632.888816

Electronic Energy (0K) + ZPE = -3632.247181

Enthalpy (353K) = -3632.175773

Free Energy (353K) = -3632.363709

**SMD-M06/6-311++G(d,p)/SDD**

Electronic Energy (0K) = -3633.491325

**B6-1**

Number of imaginary frequencies: 0

|   |             |             |             |
|---|-------------|-------------|-------------|
| C | -1.15519100 | -2.12591800 | -1.30363400 |
| C | -1.66158000 | -1.15422300 | -1.83407900 |
| N | -2.33774800 | -0.17104400 | -2.45546300 |

|   |             |             |             |
|---|-------------|-------------|-------------|
| C | -1.92974000 | 1.26169100  | -2.30658800 |
| C | -0.53976600 | 1.37797800  | -1.80441900 |
| C | -0.08649800 | 1.63312500  | -0.58643900 |
| C | -1.06648000 | 1.94250300  | 0.47705800  |
| C | -1.79682500 | 3.14171500  | 0.45488700  |
| C | -1.21844100 | 1.10092500  | 1.59511900  |
| C | -2.63417100 | 3.49930000  | 1.50539000  |
| H | -1.67393100 | 3.80789900  | -0.39921100 |
| C | -2.07328500 | 1.45138300  | 2.63866400  |
| C | -2.77288900 | 2.65213700  | 2.60223100  |
| H | -3.17983800 | 4.43983700  | 1.46565700  |
| H | -2.17578400 | 0.77384400  | 3.48198800  |
| S | -4.04250800 | -0.42553400 | -2.52606000 |
| O | -4.22727500 | -1.79559700 | -2.97157600 |
| O | -4.55343600 | 0.69829400  | -3.29566300 |
| C | -4.55134800 | -0.27542100 | -0.84216100 |
| C | -4.41177500 | -1.37395000 | 0.00939700  |
| C | -5.01882400 | 0.95175000  | -0.37677900 |
| C | -4.74763800 | -1.22605800 | 1.34652100  |
| H | -4.06212200 | -2.32957000 | -0.37380300 |
| C | -5.35889200 | 1.07216300  | 0.96475900  |
| H | -5.12927300 | 1.79199200  | -1.05838600 |
| C | -5.22723200 | -0.00723400 | 1.84222000  |
| H | -4.64776200 | -2.07395900 | 2.02282100  |
| H | -5.73162900 | 2.02351200  | 1.34061400  |
| C | -5.59989600 | 0.12236700  | 3.28506400  |
| H | -5.77564100 | 1.16581200  | 3.56532300  |
| H | -6.51673000 | -0.44052800 | 3.50219000  |
| H | -4.81708800 | -0.28559200 | 3.93540700  |
| H | -2.05453500 | 1.74139300  | -3.28259600 |

|   |             |             |             |
|---|-------------|-------------|-------------|
| H | -2.59130600 | 1.75598100  | -1.58446200 |
| C | -0.60131400 | -3.28585400 | -0.68193900 |
| C | 0.26830900  | -4.13106300 | -1.38824400 |
| C | -0.94032600 | -3.60370300 | 0.64359200  |
| C | 0.79457500  | -5.26152900 | -0.77608700 |
| H | 0.51733400  | -3.89555100 | -2.42152600 |
| C | -0.42126900 | -4.74229700 | 1.24494700  |
| H | -1.61285500 | -2.94400500 | 1.19063100  |
| C | 0.44981200  | -5.56939900 | 0.53871700  |
| H | 1.47175700  | -5.90865700 | -1.32920700 |
| H | -0.68726700 | -4.97985800 | 2.27250000  |
| H | 0.86204400  | -6.45624100 | 1.01489200  |
| N | -0.46158800 | -0.09585400 | 1.66499600  |
| H | -0.37034400 | -0.63620500 | 0.81038800  |
| C | 0.37336000  | -0.38003900 | 2.71489600  |
| O | 0.37651600  | 0.26615700  | 3.75626100  |
| C | 1.29892400  | -1.53891200 | 2.53219900  |
| C | 1.69716700  | -2.22145400 | 3.68445700  |
| C | 1.83479300  | -1.91037000 | 1.29490000  |
| C | 2.60079000  | -3.27413900 | 3.60496800  |
| H | 1.28634700  | -1.91007100 | 4.64209200  |
| C | 2.76292800  | -2.94425400 | 1.22100700  |
| H | 1.55479800  | -1.37513600 | 0.38463800  |
| C | 3.14073200  | -3.63216000 | 2.37199600  |
| H | 2.89127500  | -3.80992200 | 4.50565600  |
| H | 3.18741700  | -3.22284000 | 0.25896000  |
| H | 3.85751200  | -4.44772900 | 2.30584400  |
| H | -3.43018600 | 2.92008600  | 3.42665400  |
| N | 2.02854700  | 4.06774000  | 0.32609500  |
| C | 1.60372600  | 5.11403500  | 0.59580100  |



|    |            |             |             |
|----|------------|-------------|-------------|
| C  | 1.07149600 | 6.41385300  | 0.93209400  |
| H  | 1.68997800 | 6.88374200  | 1.70227500  |
| H  | 1.05887700 | 7.05300900  | 0.04437200  |
| H  | 0.05011000 | 6.30708400  | 1.31046600  |
| Cu | 1.66139900 | 1.83658700  | 0.21262100  |
| C  | 4.36536500 | 0.27848400  | 3.44917800  |
| H  | 3.72402300 | 0.29110900  | 4.33663100  |
| H  | 5.26752000 | 0.86490600  | 3.64676000  |
| H  | 4.64597900 | -0.75542400 | 3.22301600  |
| C  | 3.64088500 | 0.83904000  | 2.33727400  |
| N  | 3.03954500 | 1.27852800  | 1.45136600  |
| C  | 3.14949800 | -0.95570800 | -2.37440500 |
| C  | 4.12316500 | -0.00654100 | -2.06108800 |
| C  | 3.75882500 | 1.33139500  | -2.04442100 |
| C  | 2.45127400 | 1.71402500  | -2.33414900 |
| C  | 1.85160500 | -0.57042400 | -2.65215200 |
| H  | 5.14509400 | -0.30976300 | -1.84823100 |
| H  | 1.02960800 | -1.24018100 | -2.89345000 |
| N  | 1.57548500 | 0.74570300  | -2.66045100 |
| O  | 0.30982900 | 1.10979400  | -2.96227100 |
| H  | 2.10650800 | 2.74063800  | -2.41266700 |
| Cl | 4.90718000 | 2.55644100  | -1.65742500 |
| Cl | 3.55822000 | -2.62938800 | -2.46961000 |

**SMD-M06/6-31G(d,p)/SDD**

Electronic Energy (0K) = -3632.916773

Electronic Energy (0K) + ZPE = -3632.271583

Enthalpy (353K) = -3632.200742

Free Energy (353K) = -3632.386434

**SMD-M06/6-311++G(d,p)/SDD**

Electronic Energy (0K) = -3633.514173

**A7**

Number of imaginary frequencies: 0

|   |             |             |             |
|---|-------------|-------------|-------------|
| C | 0.05981000  | -0.11802400 | 0.84500000  |
| C | 0.55710100  | -0.82692200 | -0.03468100 |
| N | 1.09331600  | -1.65306900 | -0.92366600 |
| C | 0.58109500  | -1.81292300 | -2.31475900 |
| C | -0.74963400 | -1.25483700 | -2.42623300 |
| C | -1.85249500 | -0.75103900 | -2.47980100 |
| C | -3.05878100 | 0.00686400  | -2.48378000 |
| C | -4.26101300 | -0.52343700 | -2.96342900 |
| C | -3.02042200 | 1.33643500  | -1.98868800 |
| C | -5.41707500 | 0.24424400  | -2.96949900 |
| H | -4.26745800 | -1.54462500 | -3.33743700 |
| C | -4.19311200 | 2.09632200  | -1.98719200 |
| C | -5.37276800 | 1.54880400  | -2.48164900 |
| H | -6.34599700 | -0.17083900 | -3.35145700 |
| H | -4.16194900 | 3.11078200  | -1.60769800 |
| S | 2.56227800  | -2.44214800 | -0.48341400 |
| O | 2.74793100  | -3.45433300 | -1.51327500 |
| O | 2.43158200  | -2.80070400 | 0.91733900  |
| C | 3.76794800  | -1.16875900 | -0.65028100 |
| C | 4.35215800  | -0.94213000 | -1.89662400 |
| C | 4.06261600  | -0.37597800 | 0.45597300  |
| C | 5.25436600  | 0.10296400  | -2.02311100 |
| H | 4.11593600  | -1.58265400 | -2.74329600 |
| C | 4.96654100  | 0.66770800  | 0.30342500  |
| H | 3.60190300  | -0.58070000 | 1.41976000  |
| C | 5.56922800  | 0.92386500  | -0.93166600 |
| H | 5.72944200  | 0.29071100  | -2.98459900 |

|   |             |             |             |
|---|-------------|-------------|-------------|
| H | 5.21008500  | 1.29639400  | 1.15833600  |
| C | 6.51447300  | 2.06908500  | -1.10746100 |
| H | 6.08548300  | 2.82228700  | -1.78142400 |
| H | 6.74126800  | 2.55687400  | -0.15453100 |
| H | 7.45684300  | 1.73961700  | -1.56047900 |
| H | 1.27147200  | -1.31369700 | -3.01052500 |
| H | 0.58157900  | -2.88342400 | -2.55018100 |
| C | -0.10563200 | 1.01575300  | 1.71671700  |
| C | 1.02308200  | 1.56503900  | 2.34220800  |
| C | -1.37017200 | 1.56563600  | 1.96921400  |
| C | 0.88200300  | 2.63923800  | 3.21236000  |
| H | 2.00582500  | 1.14385200  | 2.13417900  |
| C | -1.49720400 | 2.65638100  | 2.82027200  |
| H | -2.24631600 | 1.13269300  | 1.48929100  |
| C | -0.37504500 | 3.19070300  | 3.45064100  |
| H | 1.76243300  | 3.05740400  | 3.69546000  |
| H | -2.48008000 | 3.08693600  | 2.99761900  |
| H | -0.47973800 | 4.03755200  | 4.12477700  |
| N | -1.78541000 | 1.80629600  | -1.54329200 |
| H | -1.04431900 | 1.11443800  | -1.56595500 |
| C | -1.43610700 | 3.05266100  | -1.08468500 |
| O | -2.24062300 | 3.95101700  | -0.87735200 |
| C | 0.02897200  | 3.22634800  | -0.84062000 |
| C | 0.41651200  | 4.27666400  | -0.00547800 |
| C | 1.01166100  | 2.41088000  | -1.41561800 |
| C | 1.75917900  | 4.49242700  | 0.27809800  |
| H | -0.35538700 | 4.91088200  | 0.42429300  |
| C | 2.35461600  | 2.62787900  | -1.13147300 |
| H | 0.74876800  | 1.61597200  | -2.11396100 |
| C | 2.73023200  | 3.66334400  | -0.27854700 |

|    |             |             |             |
|----|-------------|-------------|-------------|
| H  | 2.04870200  | 5.30564300  | 0.93975900  |
| H  | 3.11248200  | 1.99142600  | -1.58636300 |
| H  | 3.78256600  | 3.82933000  | -0.05420100 |
| H  | -6.27387400 | 2.15814300  | -2.48237400 |
| N  | -0.89013200 | -3.57046700 | 0.38701900  |
| N  | -3.22041900 | -1.20481500 | 0.85734200  |
| C  | -0.45714600 | -4.51265900 | -0.12807400 |
| C  | -4.33921000 | -0.94044500 | 0.71874500  |
| C  | 0.10989900  | -5.66979100 | -0.77719400 |
| C  | -5.73250700 | -0.60632400 | 0.55080800  |
| H  | 1.13969200  | -5.44603400 | -1.07825900 |
| H  | 0.11377900  | -6.52000800 | -0.08870400 |
| H  | -0.47755300 | -5.92760500 | -1.66340400 |
| H  | -6.21049200 | -1.32828600 | -0.11807200 |
| H  | -6.23693500 | -0.62658600 | 1.52139100  |
| H  | -5.82074800 | 0.39597700  | 0.11892800  |
| Cu | -1.31506500 | -1.78991400 | 1.20759000  |
| C  | -0.61699200 | -1.08748400 | 5.70570000  |
| H  | -0.39530500 | -0.01538600 | 5.71986100  |
| H  | 0.24408600  | -1.63699900 | 6.09693700  |
| H  | -1.48667900 | -1.28293700 | 6.33965600  |
| C  | -0.89086900 | -1.50021500 | 4.35046800  |
| N  | -1.10764600 | -1.81405500 | 3.25674200  |

**SMD-M06/6-31G(d,p)/SDD**

Electronic Energy (0K) = -2523.235055

Electronic Energy (0K) + ZPE = -2522.620719

Enthalpy (353K) = -2522.553743

Free Energy (353K) = -2522.732716

**SMD-M06/6-311++G(d,p)/SDD**

Electronic Energy (0K) = -2523.729673

**TS<sub>A7</sub>**

Number of imaginary frequencies: 1

|   |             |             |             |
|---|-------------|-------------|-------------|
| C | 0.64766300  | -0.31971400 | 1.37044800  |
| C | 0.39346500  | 0.88410100  | 0.93519600  |
| N | -0.41240800 | 1.68521800  | 0.25065300  |
| C | -0.51662300 | 1.65137000  | -1.24308200 |
| C | -0.19953200 | 0.33336100  | -1.74803600 |
| C | 0.09394800  | -0.79474600 | -2.08962800 |
| C | 0.25281100  | -2.16729700 | -2.43686800 |
| C | 1.47656800  | -2.67449100 | -2.88652600 |
| C | -0.86007300 | -3.03756900 | -2.29977200 |
| C | 1.60924400  | -4.01760500 | -3.20870500 |
| H | 2.31933500  | -1.99001200 | -2.97965100 |
| C | -0.71535000 | -4.38893300 | -2.62272200 |
| C | 0.51041500  | -4.86358100 | -3.07481100 |
| H | 2.56158800  | -4.40360500 | -3.56414100 |
| H | -1.56704600 | -5.04970300 | -2.51181600 |
| S | -0.95455400 | 3.15982000  | 1.01386600  |
| O | -0.34555700 | 4.25390500  | 0.26412400  |
| O | -0.69701800 | 2.97143900  | 2.42955500  |
| C | -2.69886700 | 3.19109100  | 0.73237600  |
| C | -3.20244900 | 3.86140700  | -0.38371900 |
| C | -3.54435200 | 2.63186100  | 1.68886200  |
| C | -4.57693300 | 3.95489200  | -0.54145800 |
| H | -2.52662800 | 4.32158200  | -1.10079700 |
| C | -4.91703100 | 2.73922300  | 1.51152000  |
| H | -3.13527800 | 2.15042700  | 2.57390500  |
| C | -5.45171000 | 3.39837700  | 0.40035000  |
| H | -4.98513100 | 4.47873400  | -1.40418000 |

|   |             |             |             |
|---|-------------|-------------|-------------|
| H | -5.58917100 | 2.31111900  | 2.25302000  |
| C | -6.92989300 | 3.49464700  | 0.19609200  |
| H | -7.23548800 | 2.92930900  | -0.69449400 |
| H | -7.48462100 | 3.10356100  | 1.05467300  |
| H | -7.23918500 | 4.53332200  | 0.02980600  |
| H | -1.55140000 | 1.91735000  | -1.50232600 |
| H | 0.13807600  | 2.41664200  | -1.68300500 |
| C | -0.50647100 | -1.24052600 | 1.48090200  |
| C | -1.76678300 | -0.81003600 | 1.92421000  |
| C | -0.34814900 | -2.59259300 | 1.14114200  |
| C | -2.82970100 | -1.69938800 | 2.02723700  |
| H | -1.89712000 | 0.22992500  | 2.21690200  |
| C | -1.41845500 | -3.47690900 | 1.22305200  |
| H | 0.62628200  | -2.93862100 | 0.79576900  |
| C | -2.66084300 | -3.03689100 | 1.67410100  |
| H | -3.79938700 | -1.34190600 | 2.37164300  |
| H | -1.28250500 | -4.51662100 | 0.92898400  |
| H | -3.49437800 | -3.73276800 | 1.74690700  |
| N | -2.04315500 | -2.46995000 | -1.83706300 |
| H | -1.94024600 | -1.51272600 | -1.51757500 |
| C | -3.26703000 | -3.05100700 | -1.61910100 |
| O | -3.49710700 | -4.24288200 | -1.77385200 |
| C | -4.31196400 | -2.09070000 | -1.15223500 |
| C | -5.41424200 | -2.61464100 | -0.47336100 |
| C | -4.22524400 | -0.70953600 | -1.35728300 |
| C | -6.39522800 | -1.76990100 | 0.03103800  |
| H | -5.47787600 | -3.69187500 | -0.33679100 |
| C | -5.21052300 | 0.13322600  | -0.85946800 |
| H | -3.40773700 | -0.27826700 | -1.93462500 |
| C | -6.29006100 | -0.39272000 | -0.15398000 |

|    |             |             |             |
|----|-------------|-------------|-------------|
| H  | -7.24326300 | -2.18503500 | 0.57052100  |
| H  | -5.13430500 | 1.20592800  | -1.02790900 |
| H  | -7.05540900 | 0.27183600  | 0.24351500  |
| H  | 0.60568700  | -5.91811100 | -3.32380800 |
| N  | 4.09366500  | -0.09811400 | 2.51781500  |
| N  | 3.43411600  | -2.14142900 | 0.22892800  |
| C  | 4.95510200  | 0.50391300  | 3.00381200  |
| C  | 4.02959700  | -2.71464100 | -0.58358600 |
| C  | 6.02593600  | 1.25493400  | 3.61551600  |
| C  | 4.78120400  | -3.42832200 | -1.58973900 |
| H  | 5.61760200  | 2.12632400  | 4.13592400  |
| H  | 6.55702400  | 0.62555300  | 4.33565800  |
| H  | 6.72989100  | 1.59365400  | 2.84991500  |
| H  | 5.84199200  | -3.17105700 | -1.51327800 |
| H  | 4.66267300  | -4.50657400 | -1.44495000 |
| H  | 4.41707000  | -3.16229800 | -2.58818400 |
| Cu | 2.44451600  | -1.05164000 | 1.73979500  |
| C  | 1.24606000  | -4.44046300 | 4.76277900  |
| H  | 0.23071500  | -4.65767200 | 4.41619200  |
| H  | 1.19847700  | -4.05710600 | 5.78612000  |
| H  | 1.83316500  | -5.36322900 | 4.75326700  |
| C  | 1.85113700  | -3.45700500 | 3.89544600  |
| N  | 2.32369600  | -2.66626200 | 3.19140000  |
| C  | 3.20924600  | 3.83986700  | -1.63731800 |
| C  | 3.74149900  | 2.84825700  | -2.45177300 |
| C  | 3.66870500  | 1.54380100  | -1.98047000 |
| C  | 3.09239800  | 1.24425300  | -0.76130100 |
| C  | 2.61585700  | 3.53640500  | -0.42534400 |
| H  | 4.19836000  | 3.08316300  | -3.40873300 |
| H  | 2.15466100  | 4.25981300  | 0.23766900  |

|    |            |            |             |
|----|------------|------------|-------------|
| N  | 2.56028200 | 2.24582700 | -0.01940100 |
| O  | 1.98126300 | 1.97390000 | 1.12433600  |
| H  | 3.01761000 | 0.24558700 | -0.33572700 |
| Cl | 4.31866400 | 0.24108900 | -2.92124000 |
| Cl | 3.25967400 | 5.49663200 | -2.13680200 |

**SMD-M06/6-31G(d,p)/SDD**

Electronic Energy (0K) = -3765.573463

Electronic Energy (0K) + ZPE = -3764.884920

Enthalpy (353K) = -3764.806849

Free Energy (353K) = -3765.012207

**SMD-M06/6-311++G(d,p)/SDD**

Electronic Energy (0K) = -3766.206057

**B7**

Number of imaginary frequencies: 0

|   |             |             |             |
|---|-------------|-------------|-------------|
| C | 0.77555500  | -0.19030300 | 1.39848900  |
| C | 0.62487400  | 1.05156400  | 0.91591900  |
| N | -0.48047300 | 1.65443800  | 0.27034800  |
| C | -0.58976000 | 1.58599900  | -1.21198000 |
| C | -0.24887600 | 0.26243400  | -1.69759100 |
| C | 0.05665200  | -0.85666200 | -2.05855800 |
| C | 0.22278300  | -2.22764200 | -2.41136000 |
| C | 1.44276000  | -2.72473300 | -2.88097800 |
| C | -0.87988300 | -3.10816900 | -2.25711400 |
| C | 1.58238200  | -4.06650300 | -3.20683100 |
| H | 2.27856800  | -2.03359500 | -2.98647400 |
| C | -0.72859700 | -4.45806300 | -2.58338900 |
| C | 0.49361100  | -4.92221200 | -3.05601800 |
| H | 2.53247400  | -4.44349800 | -3.57767200 |
| H | -1.57262800 | -5.12631600 | -2.45878400 |



|   |             |             |             |
|---|-------------|-------------|-------------|
| S | -1.03344900 | 3.11449700  | 0.94765700  |
| O | -0.45534600 | 4.22832400  | 0.18914600  |
| O | -0.78233700 | 3.00262500  | 2.37787000  |
| C | -2.78338100 | 3.12446700  | 0.66768700  |
| C | -3.29660700 | 3.77152900  | -0.45703700 |
| C | -3.62595400 | 2.57774900  | 1.63379100  |
| C | -4.67246100 | 3.85350600  | -0.61533400 |
| H | -2.62490200 | 4.22463300  | -1.18247200 |
| C | -5.00009300 | 2.67488100  | 1.45887900  |
| H | -3.21581600 | 2.11386400  | 2.52750100  |
| C | -5.54229700 | 3.30949700  | 0.33739600  |
| H | -5.08497300 | 4.35948300  | -1.48678200 |
| H | -5.66749500 | 2.25632300  | 2.21036700  |
| C | -7.02204000 | 3.38586800  | 0.13242700  |
| H | -7.32974600 | 2.74742200  | -0.70698100 |
| H | -7.57193000 | 3.06202800  | 1.02177700  |
| H | -7.33697000 | 4.40600900  | -0.11629300 |
| H | -1.63295000 | 1.81100200  | -1.47901800 |
| H | 0.03315700  | 2.34956800  | -1.70585400 |
| C | -0.40054500 | -1.06651300 | 1.51827300  |
| C | -1.63119700 | -0.60944000 | 2.01880300  |
| C | -0.29389300 | -2.42649300 | 1.18477400  |
| C | -2.71130500 | -1.47130400 | 2.16790700  |
| H | -1.71645400 | 0.43094700  | 2.32427400  |
| C | -1.38016200 | -3.28547200 | 1.31250200  |
| H | 0.66070500  | -2.80148200 | 0.81253400  |
| C | -2.59305800 | -2.81361600 | 1.81029300  |
| H | -3.65341000 | -1.09085100 | 2.56173100  |
| H | -1.28073200 | -4.32999400 | 1.01923800  |
| H | -3.43903100 | -3.48897300 | 1.92264800  |

|    |             |             |             |
|----|-------------|-------------|-------------|
| N  | -2.06188000 | -2.54998200 | -1.78014400 |
| H  | -1.96396500 | -1.59016700 | -1.46533200 |
| C  | -3.26706400 | -3.14903700 | -1.51271400 |
| O  | -3.47782600 | -4.34881200 | -1.63081800 |
| C  | -4.31805800 | -2.19670200 | -1.04457900 |
| C  | -5.39415100 | -2.72117700 | -0.32519600 |
| C  | -4.26361700 | -0.82131900 | -1.29355300 |
| C  | -6.38106300 | -1.88066700 | 0.17438800  |
| H  | -5.43239600 | -3.79465800 | -0.15374300 |
| C  | -5.25634600 | 0.01647600  | -0.80260300 |
| H  | -3.46543200 | -0.39266600 | -1.89915800 |
| C  | -6.30926700 | -0.50840600 | -0.05739200 |
| H  | -7.20779600 | -2.29517700 | 0.74646000  |
| H  | -5.20491900 | 1.08478400  | -1.00483800 |
| H  | -7.07909800 | 0.15338600  | 0.33626200  |
| H  | 0.59374600  | -5.97566600 | -3.30762800 |
| N  | 4.25873100  | 0.01403300  | 2.44422000  |
| N  | 3.53047200  | -2.07738800 | 0.23653300  |
| C  | 5.14713700  | 0.60780400  | 2.89132500  |
| C  | 4.07230500  | -2.69241000 | -0.58355000 |
| C  | 6.25253400  | 1.34603100  | 3.45520600  |
| C  | 4.76174600  | -3.45963100 | -1.59539000 |
| H  | 5.88167800  | 2.24211900  | 3.96156600  |
| H  | 6.78432600  | 0.72169900  | 4.17927800  |
| H  | 6.94608800  | 1.64321000  | 2.66330700  |
| H  | 5.83524800  | -3.25262700 | -1.55156800 |
| H  | 4.59558100  | -4.52813600 | -1.42697200 |
| H  | 4.38443000  | -3.19560200 | -2.58940200 |
| Cu | 2.55574600  | -0.92369300 | 1.78020300  |
| C  | 1.42515600  | -4.33642100 | 4.76908200  |

|    |            |             |             |
|----|------------|-------------|-------------|
| H  | 0.40312800 | -4.52861400 | 4.42751500  |
| H  | 1.39285500 | -3.96976200 | 5.79910500  |
| H  | 1.99471900 | -5.26971700 | 4.73937700  |
| C  | 2.04174300 | -3.34929000 | 3.91391700  |
| N  | 2.52439500 | -2.55436800 | 3.22096700  |
| C  | 3.16177100 | 3.81298100  | -1.68102700 |
| C  | 3.69102800 | 2.80708000  | -2.48182300 |
| C  | 3.54138600 | 1.48880500  | -2.06457700 |
| C  | 2.87591000 | 1.18472300  | -0.89037200 |
| C  | 2.49312400 | 3.50292200  | -0.50878600 |
| H  | 4.21287000 | 3.04597600  | -3.40518500 |
| H  | 2.02485100 | 4.22023900  | 0.15838000  |
| N  | 2.37622300 | 2.20815000  | -0.17771400 |
| O  | 1.75135900 | 1.95210600  | 1.02557200  |
| H  | 2.71664300 | 0.18240900  | -0.48764700 |
| Cl | 4.20705600 | 0.19825700  | -2.99961200 |
| Cl | 3.31484900 | 5.46860300  | -2.13576300 |

**SMD-M06/6-31G(d,p)/SDD**

Electronic Energy (0K) = -3765.588859

Electronic Energy (0K) + ZPE = -3764.898511

Enthalpy (353K) = -3764.820469

Free Energy (353K) = -3765.027095

**SMD-M06/6-311++G(d,p)/SDD**

Electronic Energy (0K) = -3766.219567

**TS<sub>A7-1</sub>**

Number of imaginary frequencies: 1

|   |             |             |             |
|---|-------------|-------------|-------------|
| C | -0.14294900 | -0.06246500 | -1.02164300 |
| C | -1.01429200 | -0.38141800 | -0.07091100 |
| N | -1.02943600 | -0.06626500 | 1.25182800  |

|   |             |             |            |
|---|-------------|-------------|------------|
| C | 0.07223200  | 0.60782600  | 1.97644300 |
| C | 1.29727300  | -0.17175100 | 1.88950300 |
| C | 2.26876400  | -0.86984500 | 1.67807000 |
| C | 3.43280600  | -1.63226400 | 1.36924700 |
| C | 3.45678300  | -3.01513000 | 1.58667000 |
| C | 4.55941300  | -0.99252900 | 0.79514900 |
| C | 4.57118900  | -3.76716600 | 1.24387500 |
| H | 2.57864200  | -3.48639100 | 2.02361100 |
| C | 5.67560900  | -1.75903100 | 0.44865900 |
| C | 5.67305300  | -3.13110200 | 0.67616000 |
| H | 4.58156900  | -4.83988300 | 1.41911600 |
| H | 6.53521600  | -1.26740900 | 0.00971000 |
| S | -2.36385200 | -0.55893800 | 2.19053500 |
| O | -1.85812500 | -0.97216800 | 3.49747400 |
| O | -3.14819900 | -1.49016100 | 1.39110300 |
| C | -3.26730000 | 0.95231300  | 2.36878500 |
| C | -3.49041100 | 1.50074600  | 3.62421000 |
| C | -3.73145200 | 1.57288600  | 1.20742500 |
| C | -4.20370600 | 2.69317400  | 3.71352500 |
| H | -3.11343200 | 1.00309000  | 4.51433300 |
| C | -4.43591100 | 2.75863000  | 1.31652400 |
| H | -3.52822000 | 1.12798600  | 0.23425500 |
| C | -4.68532800 | 3.33480700  | 2.57125300 |
| H | -4.38858300 | 3.13568300  | 4.69070700 |
| H | -4.80244100 | 3.25433200  | 0.41763100 |
| C | -5.45429900 | 4.61456500  | 2.66636300 |
| H | -5.52757900 | 4.96638700  | 3.69993500 |
| H | -4.98193100 | 5.40345900  | 2.06855500 |
| H | -6.47235800 | 4.48960600  | 2.27721000 |
| H | 0.23338600  | 1.59988000  | 1.53062600 |

|   |             |             |             |
|---|-------------|-------------|-------------|
| H | -0.22773300 | 0.76897800  | 3.01823700  |
| C | 0.82184700  | 1.00365100  | -1.32572900 |
| C | 0.49946800  | 2.33079100  | -1.00750800 |
| C | 2.04075700  | 0.73122700  | -1.95758200 |
| C | 1.38236700  | 3.36262200  | -1.31294600 |
| H | -0.45803400 | 2.54235300  | -0.52796000 |
| C | 2.91884600  | 1.76392900  | -2.26389200 |
| H | 2.29008400  | -0.30099700 | -2.20313400 |
| C | 2.58979900  | 3.08069300  | -1.94574300 |
| H | 1.12822300  | 4.38907300  | -1.05658200 |
| H | 3.86976000  | 1.54278100  | -2.74576600 |
| H | 3.28361800  | 3.88608800  | -2.17842800 |
| N | 4.48326600  | 0.39164700  | 0.62622100  |
| H | 3.56906900  | 0.78946800  | 0.81715900  |
| C | 5.47501300  | 1.27186900  | 0.27083300  |
| O | 6.58115400  | 0.92692000  | -0.12432100 |
| C | 5.10156100  | 2.71250900  | 0.39887900  |
| C | 5.83296300  | 3.63107800  | -0.35853600 |
| C | 4.09182300  | 3.17292800  | 1.25055400  |
| C | 5.54592900  | 4.98803400  | -0.28588600 |
| H | 6.62536200  | 3.25990300  | -1.00431700 |
| C | 3.81418500  | 4.53319100  | 1.33147900  |
| H | 3.53319800  | 2.48175700  | 1.88202600  |
| C | 4.53438900  | 5.44086300  | 0.55917000  |
| H | 6.11400300  | 5.69559400  | -0.88526600 |
| H | 3.03608500  | 4.88563900  | 2.00450700  |
| H | 4.31343400  | 6.50398400  | 0.62250500  |
| H | 6.55263900  | -3.70981600 | 0.40243300  |
| N | -0.22511700 | -3.23629500 | 0.98399200  |
| N | 1.76454500  | -2.89725600 | -1.49961800 |

|    |             |             |             |
|----|-------------|-------------|-------------|
| C  | -0.66315300 | -3.67617300 | 1.96184800  |
| C  | 2.68130500  | -3.41902300 | -1.97560200 |
| C  | -1.21564100 | -4.23044600 | 3.17415900  |
| C  | 3.82712600  | -4.06813400 | -2.56366600 |
| H  | -2.27135900 | -3.95323600 | 3.25504500  |
| H  | -1.12475100 | -5.32070200 | 3.16145900  |
| H  | -0.67816400 | -3.83314100 | 4.04020700  |
| H  | 4.12147300  | -4.92525600 | -1.95025900 |
| H  | 3.57942800  | -4.41499200 | -3.57131800 |
| H  | 4.66178000  | -3.36269800 | -2.62076200 |
| Cu | 0.28809400  | -1.99243700 | -0.52142400 |
| C  | -3.18193500 | -4.54130400 | -0.10913600 |
| H  | -3.28236700 | -3.62670000 | 0.48970500  |
| H  | -2.78255500 | -5.34595300 | 0.51692900  |
| H  | -4.16754800 | -4.84023500 | -0.47882700 |
| C  | -2.29018200 | -4.28661900 | -1.21943700 |
| N  | -1.57768100 | -4.05105600 | -2.10781800 |
| C  | -3.59821200 | 1.68343900  | -2.88950500 |
| C  | -4.60843300 | 0.85985300  | -2.38690400 |
| C  | -4.25908500 | -0.41719700 | -1.98442000 |
| C  | -2.94244900 | -0.86046500 | -2.06523200 |
| C  | -2.29907300 | 1.23464200  | -2.98505900 |
| H  | -5.63493500 | 1.21062600  | -2.32083300 |
| H  | -1.46283500 | 1.81527600  | -3.36072400 |
| N  | -2.02105700 | -0.03198100 | -2.59599700 |
| O  | -0.75185500 | -0.41847400 | -2.55848200 |
| H  | -2.60894000 | -1.86276400 | -1.82330000 |
| Cl | -5.44774200 | -1.49506000 | -1.34335800 |
| Cl | -3.96731000 | 3.29542400  | -3.40069000 |

**SMD-M06/6-31G(d,p)/SDD**

Electronic Energy (0K) = -3765.569608

Electronic Energy (0K) + ZPE = -3764.880198

Enthalpy (353K) = -3764.802972

Free Energy (353K) = -3765.005438

**SMD-M06/6-311++G(d,p)/SDD**

Electronic Energy (0K) = -3766.200387

**B7-1**

Number of imaginary frequencies: 0

|   |             |             |             |
|---|-------------|-------------|-------------|
| C | -0.20721600 | -0.07568100 | -1.08821700 |
| C | -1.06947900 | -0.38351400 | -0.10964400 |
| N | -1.04641200 | -0.01787100 | 1.20226100  |
| C | 0.07044300  | 0.66475600  | 1.89606100  |
| C | 1.28794800  | -0.12828900 | 1.82767300  |
| C | 2.25237200  | -0.84289600 | 1.64022100  |
| C | 3.40821500  | -1.62916100 | 1.36154500  |
| C | 3.40412100  | -3.00850300 | 1.60155900  |
| C | 4.55453400  | -1.01890400 | 0.79486000  |
| C | 4.50850000  | -3.78649400 | 1.28551700  |
| H | 2.51134000  | -3.45657400 | 2.03309700  |
| C | 5.66035600  | -1.81163500 | 0.47458400  |
| C | 5.62899200  | -3.17985300 | 0.72215300  |
| H | 4.49651800  | -4.85638000 | 1.47724200  |
| H | 6.53483300  | -1.34319000 | 0.03985800  |
| S | -2.34622300 | -0.50476400 | 2.19359800  |
| O | -1.79511400 | -0.91992500 | 3.48203600  |
| O | -3.17056100 | -1.43185900 | 1.43034900  |
| C | -3.23019300 | 1.01399100  | 2.40782000  |
| C | -3.39841600 | 1.55717500  | 3.67418300  |
| C | -3.73580100 | 1.64429400  | 1.26892200  |

|   |             |             |             |
|---|-------------|-------------|-------------|
| C | -4.09723400 | 2.75466300  | 3.79981700  |
| H | -2.98915600 | 1.05096900  | 4.54508400  |
| C | -4.42530900 | 2.83536000  | 1.41469500  |
| H | -3.57724600 | 1.20413400  | 0.28442300  |
| C | -4.61846400 | 3.40674800  | 2.68146800  |
| H | -4.23884900 | 3.19241400  | 4.78632100  |
| H | -4.82564200 | 3.34104800  | 0.53632600  |
| C | -5.36825100 | 4.69459900  | 2.81397300  |
| H | -5.43142200 | 5.01989800  | 3.85687400  |
| H | -4.88536000 | 5.49232100  | 2.23635500  |
| H | -6.38922400 | 4.59624100  | 2.42521900  |
| H | 0.23810100  | 1.64088900  | 1.42033600  |
| H | -0.21860100 | 0.86216400  | 2.93483400  |
| C | 0.77719900  | 0.98935700  | -1.36134300 |
| C | 0.45703200  | 2.31966700  | -1.05657300 |
| C | 2.00925700  | 0.70808200  | -1.96263600 |
| C | 1.35511100  | 3.34467700  | -1.34075100 |
| H | -0.51071400 | 2.54114000  | -0.60285900 |
| C | 2.90287800  | 1.73352900  | -2.24954300 |
| H | 2.25864800  | -0.32650500 | -2.19854500 |
| C | 2.57658900  | 3.05319800  | -1.94141400 |
| H | 1.10036400  | 4.37352400  | -1.09468800 |
| H | 3.86263000  | 1.50393200  | -2.70946500 |
| H | 3.28210000  | 3.85302900  | -2.15784000 |
| N | 4.50781300  | 0.36445100  | 0.60723000  |
| H | 3.60175300  | 0.78390600  | 0.79154600  |
| C | 5.52164900  | 1.21777900  | 0.24838400  |
| O | 6.62250200  | 0.84253100  | -0.13385700 |
| C | 5.18219700  | 2.66851400  | 0.35435300  |
| C | 5.94793300  | 3.55918300  | -0.40260700 |



|    |             |             |             |
|----|-------------|-------------|-------------|
| C  | 4.17275900  | 3.16482300  | 1.18578400  |
| C  | 5.69581000  | 4.92389900  | -0.34874200 |
| H  | 6.73968400  | 3.16015200  | -1.03228100 |
| C  | 3.93001500  | 4.53267500  | 1.24820300  |
| H  | 3.58496500  | 2.49536100  | 1.81421200  |
| C  | 4.68506800  | 5.41254400  | 0.47708700  |
| H  | 6.29074200  | 5.60945800  | -0.94760500 |
| H  | 3.15145800  | 4.91261600  | 1.90557700  |
| H  | 4.49118100  | 6.48168300  | 0.52577700  |
| H  | 6.50093100  | -3.77879600 | 0.46820700  |
| N  | -0.24879300 | -3.21103500 | 1.01780700  |
| N  | 1.72748800  | -2.91347500 | -1.48224200 |
| C  | -0.67049200 | -3.64580100 | 2.00507800  |
| C  | 2.64354000  | -3.44257600 | -1.95157900 |
| C  | -1.20150300 | -4.19396900 | 3.22964300  |
| C  | 3.78905900  | -4.10042300 | -2.53059300 |
| H  | -2.25520100 | -3.91530500 | 3.32999500  |
| H  | -1.11219500 | -5.28438400 | 3.22018100  |
| H  | -0.64731600 | -3.79351200 | 4.08365300  |
| H  | 4.07620100  | -4.95570000 | -1.91122600 |
| H  | 3.54489100  | -4.45142900 | -3.53767200 |
| H  | 4.62745500  | -3.39938000 | -2.58707000 |
| Cu | 0.25421500  | -1.99362500 | -0.51107200 |
| C  | -3.20383700 | -4.49843100 | -0.04079700 |
| H  | -3.30004200 | -3.56393100 | 0.52771600  |
| H  | -2.79705600 | -5.27972900 | 0.60965000  |
| H  | -4.19211100 | -4.81148400 | -0.39116000 |
| C  | -2.32207000 | -4.27994400 | -1.16670600 |
| N  | -1.61780400 | -4.07109100 | -2.06827800 |
| C  | -3.63501200 | 1.64064500  | -2.96656800 |

|    |             |             |             |
|----|-------------|-------------|-------------|
| C  | -4.63954400 | 0.83599700  | -2.42103300 |
| C  | -4.29097700 | -0.42534700 | -1.97369100 |
| C  | -2.97444900 | -0.87256300 | -2.04700000 |
| C  | -2.33565100 | 1.19013600  | -3.04905400 |
| H  | -5.66609500 | 1.18787200  | -2.36361200 |
| H  | -1.50018800 | 1.75660100  | -3.44782800 |
| N  | -2.06099800 | -0.06060500 | -2.61370200 |
| O  | -0.78178800 | -0.44542000 | -2.54847300 |
| H  | -2.64268400 | -1.86900700 | -1.78329300 |
| Cl | -5.47618600 | -1.47916800 | -1.28927400 |
| Cl | -4.01574400 | 3.22435900  | -3.55051200 |

**SMD-M06/6-31G(d,p)/SDD**

Electronic Energy (0K) = -3765.569596

Electronic Energy (0K) + ZPE = -3764.879604

Enthalpy (353K) = -3764.801751

Free Energy (353K) = -3765.006259

**SMD-M06/6-311++G(d,p)/SDD**

Electronic Energy (0K) = -3766.199966

**A8**

Number of imaginary frequencies: 0

|   |             |             |             |
|---|-------------|-------------|-------------|
| C | 2.11841200  | -1.43257800 | -1.37884000 |
| C | 1.08312700  | -1.34694800 | -2.01013600 |
| N | -0.07821100 | -1.27707000 | -2.69165600 |
| C | -0.86039500 | -0.03109000 | -2.57381100 |
| C | -1.26582000 | 0.23370400  | -1.18568100 |
| C | -1.48316000 | 0.02557300  | 0.01099200  |
| C | -1.56861500 | -0.23922200 | 1.40854200  |
| C | -2.79751100 | -0.48518700 | 2.03122800  |
| C | -0.38083100 | -0.19080700 | 2.17677300  |

|   |             |             |             |
|---|-------------|-------------|-------------|
| C | -2.85730700 | -0.68409400 | 3.40301400  |
| H | -3.69807000 | -0.50474700 | 1.42036200  |
| C | -0.44993700 | -0.41123400 | 3.55258000  |
| C | -1.68262600 | -0.64813800 | 4.15340100  |
| H | -3.81276500 | -0.87052300 | 3.88642900  |
| H | 0.46030000  | -0.37858200 | 4.14037700  |
| S | -0.92736200 | -2.77317800 | -2.86613500 |
| O | 0.06058300  | -3.70169000 | -3.38647700 |
| O | -2.12462400 | -2.43027300 | -3.61844900 |
| C | -1.37517000 | -3.26008700 | -1.23010500 |
| C | -0.40061800 | -3.80860700 | -0.39285700 |
| C | -2.67929700 | -3.04821500 | -0.79061800 |
| C | -0.74887100 | -4.13045200 | 0.91024600  |
| H | 0.60574200  | -3.99357800 | -0.76031600 |
| C | -3.00881900 | -3.39757800 | 0.51274000  |
| H | -3.42231800 | -2.62471300 | -1.46214700 |
| C | -2.05189300 | -3.92885500 | 1.38198300  |
| H | -0.00042800 | -4.55519000 | 1.57779300  |
| H | -4.02751400 | -3.25040600 | 0.86792700  |
| C | -2.40012200 | -4.28127200 | 2.79294200  |
| H | -3.41767200 | -3.96968100 | 3.04962500  |
| H | -2.32623100 | -5.36393700 | 2.95577500  |
| H | -1.70515200 | -3.80639900 | 3.49646500  |
| H | -0.22576400 | 0.77892300  | -2.95400400 |
| H | -1.72670500 | -0.10388800 | -3.23933600 |
| C | 3.32480100  | -1.54993300 | -0.62414500 |
| C | 4.54192000  | -1.08318100 | -1.14091200 |
| C | 3.29534300  | -2.12441300 | 0.65705300  |
| C | 5.70304100  | -1.18242400 | -0.38522400 |
| H | 4.56239800  | -0.63946700 | -2.13404600 |

|   |             |             |             |
|---|-------------|-------------|-------------|
| C | 4.46209300  | -2.22872100 | 1.40217800  |
| H | 2.34691200  | -2.48030100 | 1.05650500  |
| C | 5.66631300  | -1.75516900 | 0.88421000  |
| H | 6.64222800  | -0.81119700 | -0.78915100 |
| H | 4.43250200  | -2.67703000 | 2.39247800  |
| H | 6.57834300  | -1.83291300 | 1.47161400  |
| N | 0.80843500  | 0.11501400  | 1.50557600  |
| H | 0.79347300  | -0.04314000 | 0.50111900  |
| C | 1.84975900  | 0.87519200  | 1.98676100  |
| O | 2.03258700  | 1.09112900  | 3.17854800  |
| C | 2.73113400  | 1.45143000  | 0.93054700  |
| C | 4.07071600  | 1.69080200  | 1.24429000  |
| C | 2.23900900  | 1.82095100  | -0.32673500 |
| C | 4.91671000  | 2.26371700  | 0.30307400  |
| H | 4.43858200  | 1.41057000  | 2.22906400  |
| C | 3.08586100  | 2.40325800  | -1.26339900 |
| H | 1.18418100  | 1.68287400  | -0.57148200 |
| C | 4.42584500  | 2.61984200  | -0.95179700 |
| H | 5.96313900  | 2.43213600  | 0.54681000  |
| H | 2.69713400  | 2.69126500  | -2.23848300 |
| H | 5.08893300  | 3.07122000  | -1.68634900 |
| H | -1.72182200 | -0.81347300 | 5.22761600  |
| N | -0.75125300 | 3.36985400  | -1.88151100 |
| N | -1.07920700 | 2.94964400  | 1.36289600  |
| C | -0.27300600 | 4.08238100  | -2.65771300 |
| C | -0.78942500 | 3.14001500  | 2.46769500  |
| C | 0.33130200  | 4.96818800  | -3.62158300 |
| C | -0.40309200 | 3.34212300  | 3.84269500  |
| H | 0.71315900  | 4.39057200  | -4.46859100 |
| H | -0.41103600 | 5.68596200  | -3.98251000 |

|    |             |            |             |
|----|-------------|------------|-------------|
| H  | 1.15805900  | 5.51128900 | -3.15410500 |
| H  | 0.48705900  | 2.73558400 | 4.04872000  |
| H  | -0.17758400 | 4.39763400 | 4.02020600  |
| H  | -1.21579400 | 3.02843700 | 4.50492100  |
| Cu | -1.52977200 | 2.18851800 | -0.47009200 |
| C  | -6.22096800 | 2.87953000 | -0.49686400 |
| H  | -6.63476200 | 2.55363300 | 0.46176900  |
| H  | -6.67621400 | 2.29467100 | -1.30127400 |
| H  | -6.45578000 | 3.93744100 | -0.64654400 |
| C  | -4.79001600 | 2.69134700 | -0.50244000 |
| N  | -3.64133800 | 2.54375000 | -0.50757500 |

**SMD-M06/6-31G(d,p)/SDD**

Electronic Energy (0K) = -2523.235552

Electronic Energy (0K) + ZPE = -2522.621210

Enthalpy (353K) = -2522.554283

Free Energy (353K) = -2522.737084

**SMD-M06/6-311++G(d,p)/SDD**

Electronic Energy (0K) = -2523.731427

**TS<sub>A8</sub>**

Number of imaginary frequencies: 1

|   |             |             |             |
|---|-------------|-------------|-------------|
| C | -1.65825700 | -0.99716800 | -2.44770600 |
| C | -1.77933800 | 0.15734900  | -2.08564200 |
| N | -1.86949400 | 1.42805100  | -1.66525900 |
| C | -0.62778600 | 2.18785000  | -1.36296500 |
| C | 0.08100400  | 1.89233100  | -0.08107100 |
| C | -0.34190000 | 1.15766700  | 0.89039900  |
| C | -1.26955100 | 0.21855200  | 1.47479700  |
| C | -2.21583400 | 0.65021700  | 2.41386300  |
| C | -1.15318500 | -1.16670400 | 1.19799100  |

|   |             |             |             |
|---|-------------|-------------|-------------|
| C | -3.03605600 | -0.25689100 | 3.06626000  |
| H | -2.27764100 | 1.71469300  | 2.63196900  |
| C | -1.99271000 | -2.07637900 | 1.84959500  |
| C | -2.91587400 | -1.61761000 | 2.78035200  |
| H | -3.76535600 | 0.09119800  | 3.79440900  |
| H | -1.88844200 | -3.13511700 | 1.64043300  |
| S | -3.38868700 | 2.19746000  | -1.80037900 |
| O | -3.97971100 | 1.75838300  | -3.05619200 |
| O | -3.13218200 | 3.60917700  | -1.54913600 |
| C | -4.34920200 | 1.53308000  | -0.47491200 |
| C | -4.78159700 | 0.20671500  | -0.54489500 |
| C | -4.67969500 | 2.35141300  | 0.59954300  |
| C | -5.54238600 | -0.29930000 | 0.49627400  |
| H | -4.53552500 | -0.41411300 | -1.40333400 |
| C | -5.46385400 | 1.82834700  | 1.62169800  |
| H | -4.33526400 | 3.38189900  | 0.62848300  |
| C | -5.89749800 | 0.50179300  | 1.58943900  |
| H | -5.87535600 | -1.33587900 | 0.46500800  |
| H | -5.73493500 | 2.45857700  | 2.46722300  |
| C | -6.72356900 | -0.06960100 | 2.69803100  |
| H | -6.74346500 | 0.59220300  | 3.57008000  |
| H | -7.76028200 | -0.22804100 | 2.37467100  |
| H | -6.33697400 | -1.04679000 | 3.01272900  |
| H | 0.05388300  | 2.01786100  | -2.20790600 |
| H | -0.89063400 | 3.25082900  | -1.39058800 |
| C | -1.52819500 | -2.38494000 | -2.74958300 |
| C | -0.70509100 | -2.81865800 | -3.80002800 |
| C | -2.19170300 | -3.33714900 | -1.95899500 |
| C | -0.54477500 | -4.17599300 | -4.04664700 |
| H | -0.18783400 | -2.07937200 | -4.40847100 |

|   |             |             |             |
|---|-------------|-------------|-------------|
| C | -2.03579000 | -4.69240600 | -2.21947600 |
| H | -2.82045600 | -2.99585900 | -1.13710500 |
| C | -1.21048900 | -5.11427900 | -3.26013700 |
| H | 0.10313700  | -4.50410700 | -4.85638100 |
| H | -2.55308800 | -5.42378400 | -1.60273100 |
| H | -1.08426300 | -6.17648700 | -3.45716000 |
| N | -0.18368300 | -1.55562300 | 0.27082400  |
| H | 0.11099500  | -0.80990800 | -0.34760800 |
| C | 0.44197200  | -2.76834700 | 0.14419500  |
| O | 0.18206400  | -3.73614200 | 0.84868600  |
| C | 1.49189200  | -2.82620700 | -0.92162900 |
| C | 2.05322500  | -4.08065200 | -1.17498500 |
| C | 1.93238100  | -1.72187800 | -1.66259500 |
| C | 3.02240700  | -4.23824300 | -2.15755800 |
| H | 1.70415200  | -4.92835500 | -0.59042200 |
| C | 2.89493800  | -1.88267100 | -2.65258700 |
| H | 1.54158800  | -0.71618400 | -1.49694700 |
| C | 3.44115800  | -3.13935500 | -2.90361700 |
| H | 3.44707900  | -5.22116900 | -2.34719500 |
| H | 3.21762700  | -1.01824600 | -3.23043300 |
| H | 4.19300700  | -3.26062700 | -3.68042700 |
| H | -3.55518100 | -2.33712100 | 3.28795700  |
| N | 3.44960000  | 1.71354000  | -1.09707300 |
| N | 2.96268000  | 3.67899600  | 1.34122500  |
| C | 4.39961100  | 1.20723500  | -1.52780000 |
| C | 3.51226800  | 4.25216300  | 2.18388200  |
| C | 5.58629300  | 0.57607800  | -2.05645600 |
| C | 4.19411400  | 4.97081000  | 3.23396400  |
| H | 5.38317600  | -0.47781600 | -2.27526400 |
| H | 5.89518900  | 1.07955900  | -2.97758900 |

|    |            |             |             |
|----|------------|-------------|-------------|
| H  | 6.39780400 | 0.64219800  | -1.32495400 |
| H  | 4.19038300 | 4.37913200  | 4.15395400  |
| H  | 5.22884900 | 5.16966100  | 2.94016600  |
| H  | 3.68650700 | 5.92192500  | 3.42025100  |
| Cu | 1.88613000 | 2.75184300  | -0.13540800 |
| C  | 1.31352800 | 6.48399500  | -3.03153700 |
| H  | 0.41287400 | 7.00402400  | -2.69201400 |
| H  | 1.16204700 | 6.14343200  | -4.05998100 |
| H  | 2.15836000 | 7.17844400  | -3.00587800 |
| C  | 1.57842700 | 5.35277000  | -2.17373800 |
| N  | 1.78850500 | 4.44451200  | -1.48522000 |
| C  | 1.56919900 | -2.06332500 | 3.36572500  |
| C  | 2.70364200 | -2.36404100 | 2.62454000  |
| C  | 3.22268400 | -1.35912500 | 1.81482200  |
| C  | 2.61633800 | -0.12081100 | 1.72901200  |
| C  | 0.96802000 | -0.81799300 | 3.28323700  |
| H  | 3.16990800 | -3.34392200 | 2.67703500  |
| H  | 0.08844000 | -0.51904600 | 3.84378600  |
| N  | 1.49454400 | 0.11096400  | 2.45314800  |
| O  | 0.86992100 | 1.26056500  | 2.30646400  |
| H  | 2.95348900 | 0.70390900  | 1.10528700  |
| Cl | 4.64560700 | -1.65409300 | 0.87400200  |
| Cl | 0.85316100 | -3.25362300 | 4.39137400  |

**SMD-M06/6-31G(d,p)/SDD**

Electronic Energy (0K) = -3765.569748

Electronic Energy (0K) + ZPE = -3764.880867

Enthalpy (353K) = -3764.802833

Free Energy (353K) = -3765.008692

**SMD-M06/6-311++G(d,p)/SDD**

Electronic Energy (0K) = -3766.203877



**B8**

Number of imaginary frequencies: 0

|   |             |             |             |
|---|-------------|-------------|-------------|
| C | 1.69719500  | -0.94368400 | 2.36181200  |
| C | 1.82701900  | 0.18281800  | 1.92302900  |
| N | 1.89550300  | 1.42379900  | 1.41497800  |
| C | 0.61086900  | 2.17092500  | 1.20749000  |
| C | -0.21100000 | 1.90431000  | -0.00678400 |
| C | 0.16357600  | 1.15272400  | -1.03815600 |
| C | 1.27485200  | 0.24775500  | -1.41317500 |
| C | 2.28184400  | 0.69032500  | -2.27465600 |
| C | 1.20956600  | -1.12690200 | -1.09623600 |
| C | 3.20321500  | -0.19688800 | -2.81858300 |
| H | 2.31504300  | 1.74802700  | -2.53303300 |
| C | 2.14083600  | -2.01956800 | -1.63491900 |
| C | 3.12372400  | -1.55042400 | -2.49818400 |
| H | 3.97584900  | 0.16372100  | -3.49448900 |
| H | 2.06408200  | -3.07472500 | -1.39543500 |
| S | 3.36643800  | 2.26311500  | 1.66846900  |
| O | 3.86707600  | 1.90725800  | 2.99000300  |
| O | 3.08733600  | 3.65390500  | 1.33452400  |
| C | 4.46110400  | 1.58425500  | 0.45897400  |
| C | 4.95015000  | 0.28665400  | 0.62346100  |
| C | 4.83865400  | 2.37381700  | -0.62129000 |
| C | 5.81609300  | -0.22141500 | -0.33178000 |
| H | 4.66516100  | -0.31125500 | 1.48633000  |
| C | 5.72418800  | 1.84991200  | -1.55617100 |
| H | 4.44968900  | 3.38387600  | -0.72160800 |
| C | 6.21613500  | 0.54972700  | -1.43079300 |
| H | 6.19754800  | -1.23618500 | -0.22651500 |

|   |             |             |             |
|---|-------------|-------------|-------------|
| H | 6.03253100  | 2.45871800  | -2.40449900 |
| C | 7.14520400  | -0.02745500 | -2.45146800 |
| H | 7.28536200  | 0.65053400  | -3.29933000 |
| H | 8.13111900  | -0.23388300 | -2.01642100 |
| H | 6.76353300  | -0.98268700 | -2.83396700 |
| H | 0.00312500  | 1.99249600  | 2.10726200  |
| H | 0.86875000  | 3.23652100  | 1.22578600  |
| C | 1.54630200  | -2.31266700 | 2.73114900  |
| C | 0.68729400  | -2.68462800 | 3.77675600  |
| C | 2.21801500  | -3.31055000 | 2.00675500  |
| C | 0.49657400  | -4.02641000 | 4.08047200  |
| H | 0.16638200  | -1.90990300 | 4.33608200  |
| C | 2.03038100  | -4.64972500 | 2.32340700  |
| H | 2.87685500  | -3.01489000 | 1.19079300  |
| C | 1.16759000  | -5.01033600 | 3.35680600  |
| H | -0.17908300 | -4.30641800 | 4.88561900  |
| H | 2.55331800  | -5.41707000 | 1.75711100  |
| H | 1.01705700  | -6.06030200 | 3.59755200  |
| N | 0.17646200  | -1.53818900 | -0.24051700 |
| H | -0.15302900 | -0.80914300 | 0.37886000  |
| C | -0.41496900 | -2.76637600 | -0.14104300 |
| O | -0.11298900 | -3.72190600 | -0.84747900 |
| C | -1.49495300 | -2.85800100 | 0.89276400  |
| C | -2.03167800 | -4.12647000 | 1.12713700  |
| C | -1.98663700 | -1.76659300 | 1.62038700  |
| C | -3.02803000 | -4.30950900 | 2.07795400  |
| H | -1.64191000 | -4.96418400 | 0.55389300  |
| C | -2.97538500 | -1.95229800 | 2.57911100  |
| H | -1.61189700 | -0.75208800 | 1.47234500  |
| C | -3.49866200 | -3.22258800 | 2.81046000  |

|    |             |             |             |
|----|-------------|-------------|-------------|
| H  | -3.43335500 | -5.30319700 | 2.25352200  |
| H  | -3.33562900 | -1.09764000 | 3.14904100  |
| H  | -4.27199900 | -3.36394600 | 3.56236200  |
| H  | 3.83841600  | -2.25363900 | -2.92104100 |
| Cu | -1.97721700 | 2.76926200  | 0.13233000  |
| C  | -5.71113000 | 0.48741500  | 2.01769400  |
| H  | -6.51130100 | 0.54791500  | 1.27331000  |
| H  | -6.04860500 | 0.96449800  | 2.94272700  |
| H  | -5.48666800 | -0.56549300 | 2.21927800  |
| C  | -4.53047600 | 1.15721900  | 1.52265200  |
| N  | -3.58653100 | 1.69887000  | 1.12113800  |
| C  | -1.52421000 | -2.09249700 | -3.37968500 |
| C  | -2.68495900 | -2.37580000 | -2.67004600 |
| C  | -3.19746700 | -1.39326100 | -1.82773000 |
| C  | -2.54595800 | -0.18331000 | -1.67553500 |
| C  | -0.89329100 | -0.86527100 | -3.24401500 |
| H  | -3.18140100 | -3.33744100 | -2.77226000 |
| H  | 0.00459600  | -0.56618600 | -3.77630600 |
| N  | -1.42184000 | 0.02284800  | -2.38534700 |
| O  | -0.76685500 | 1.20825200  | -2.20806900 |
| H  | -2.85494800 | 0.62457800  | -1.01412900 |
| Cl | -4.65145200 | -1.67191700 | -0.94047200 |
| Cl | -0.82261900 | -3.26893700 | -4.42310600 |
| C  | -4.43551300 | 4.64673200  | -3.35415400 |
| H  | -5.51244900 | 4.62483200  | -3.16349800 |
| H  | -4.22305200 | 4.09868300  | -4.27684800 |
| H  | -4.11650900 | 5.68605000  | -3.47641200 |
| C  | -3.72635000 | 4.04588400  | -2.24912000 |
| N  | -3.15599100 | 3.56665100  | -1.36207200 |
| C  | -1.61250000 | 6.45926700  | 3.07926100  |

|   |             |            |            |
|---|-------------|------------|------------|
| H | -0.66526900 | 6.31857900 | 3.60821000 |
| H | -2.42306700 | 6.53174000 | 3.81040800 |
| H | -1.56566600 | 7.38921400 | 2.50517400 |
| C | -1.84915400 | 5.34561800 | 2.19044300 |
| N | -2.03931400 | 4.45172400 | 1.47744100 |

**SMD-M06/6-31G(d,p)/SDD**

Electronic Energy (0K) = -3765.577900

Electronic Energy (0K) + ZPE = -3764.887025

Enthalpy (353K) = -3764.809322

Free Energy (353K) = -3765.013136

**SMD-M06/6-311++G(d,p)/SDD**

Electronic Energy (0K) = -3766.210729

**TS<sub>A8-1</sub>**

Number of imaginary frequencies: 1

|   |             |             |             |
|---|-------------|-------------|-------------|
| C | 1.96774700  | -2.46170400 | -1.33164800 |
| C | 0.98908100  | -1.93964000 | -1.83144100 |
| N | -0.07166800 | -1.32784800 | -2.37903300 |
| C | -0.13886800 | 0.13820600  | -2.44178900 |
| C | -0.72175500 | 0.76736700  | -1.20744900 |
| C | -0.90249200 | 0.58237500  | 0.07252800  |
| C | -0.71304400 | -0.28552900 | 1.21952300  |
| C | -1.85343600 | -0.73853900 | 1.90161200  |
| C | 0.55166100  | -0.67904200 | 1.71733100  |
| C | -1.75968000 | -1.51826700 | 3.04472500  |
| H | -2.83125900 | -0.46918500 | 1.50907100  |
| C | 0.64110200  | -1.45124900 | 2.87669800  |
| C | -0.50683300 | -1.86304300 | 3.54342800  |
| H | -2.66567800 | -1.84657100 | 3.55018900  |
| H | 1.62398900  | -1.73229600 | 3.24314900  |

|   |             |             |             |
|---|-------------|-------------|-------------|
| S | -1.44386400 | -2.27604400 | -2.77343200 |
| O | -0.94475700 | -3.38670000 | -3.56813600 |
| O | -2.40152600 | -1.32224400 | -3.31682800 |
| C | -2.05656700 | -2.91636300 | -1.24533800 |
| C | -1.30493200 | -3.86090700 | -0.54109700 |
| C | -3.30606400 | -2.50268300 | -0.79466700 |
| C | -1.81487500 | -4.36684600 | 0.64356200  |
| H | -0.34366500 | -4.20268400 | -0.91664300 |
| C | -3.80687700 | -3.03977200 | 0.38510700  |
| H | -3.88267400 | -1.78217200 | -1.37015600 |
| C | -3.07132200 | -3.97152800 | 1.12059500  |
| H | -1.23451800 | -5.09386800 | 1.20990000  |
| H | -4.78592400 | -2.72418600 | 0.74484000  |
| C | -3.60897500 | -4.55661700 | 2.38757400  |
| H | -4.45234100 | -3.97640900 | 2.77618800  |
| H | -3.96099700 | -5.58309600 | 2.22235500  |
| H | -2.83234300 | -4.60693300 | 3.16006300  |
| H | 0.88805400  | 0.48183800  | -2.61528900 |
| H | -0.72659900 | 0.41936400  | -3.31879500 |
| C | 3.06176700  | -3.00591400 | -0.59449900 |
| C | 4.35880600  | -3.00895600 | -1.12750400 |
| C | 2.85257200  | -3.46632200 | 0.71550900  |
| C | 5.42731300  | -3.44773000 | -0.35578400 |
| H | 4.51730800  | -2.64882300 | -2.14187000 |
| C | 3.92443600  | -3.90975500 | 1.47815700  |
| H | 1.84299100  | -3.45303400 | 1.12508800  |
| C | 5.21278500  | -3.89618400 | 0.94575600  |
| H | 6.43278400  | -3.43659400 | -0.77007500 |
| H | 3.75666700  | -4.26064100 | 2.49401400  |
| H | 6.05233400  | -4.23577800 | 1.54807100  |

|    |             |             |             |
|----|-------------|-------------|-------------|
| N  | 1.71129800  | -0.32436500 | 0.99908300  |
| H  | 1.66300700  | -0.48304000 | -0.00300300 |
| C  | 2.91753100  | 0.02676600  | 1.54065800  |
| O  | 3.09368400  | 0.15815800  | 2.74739300  |
| C  | 4.02261100  | 0.25500800  | 0.56019700  |
| C  | 5.32983200  | 0.20498500  | 1.05112100  |
| C  | 3.81421200  | 0.51897500  | -0.79761500 |
| C  | 6.41029100  | 0.40273900  | 0.20051500  |
| H  | 5.47981200  | 0.00259900  | 2.10891000  |
| C  | 4.89518000  | 0.72865300  | -1.64708700 |
| H  | 2.80595500  | 0.57586400  | -1.20759700 |
| C  | 6.19472500  | 0.66611700  | -1.15044400 |
| H  | 7.42385100  | 0.35034100  | 0.59101100  |
| H  | 4.72091800  | 0.93475400  | -2.70125800 |
| H  | 7.03976300  | 0.82303900  | -1.81695000 |
| H  | -0.41896300 | -2.46601600 | 4.44430900  |
| N  | 1.61961700  | 3.01327200  | -1.55477100 |
| N  | 1.01654500  | 2.60239800  | 1.66846800  |
| C  | 2.31788500  | 3.51276700  | -2.33002400 |
| C  | 1.31585200  | 2.62426800  | 2.78598200  |
| C  | 3.19465900  | 4.13510400  | -3.29061100 |
| C  | 1.68006100  | 2.64449500  | 4.18066000  |
| H  | 3.15835800  | 3.58730800  | -4.23680500 |
| H  | 2.88205100  | 5.16930800  | -3.46226300 |
| H  | 4.22022800  | 4.12841300  | -2.90921500 |
| H  | 2.76269100  | 2.76654800  | 4.27649600  |
| H  | 1.17315200  | 3.47070000  | 4.68737000  |
| H  | 1.38816400  | 1.69665900  | 4.64270400  |
| Cu | 0.48380800  | 2.13399400  | -0.18395500 |
| C  | 0.11048300  | 7.21398500  | -0.29751500 |

|    |             |             |             |
|----|-------------|-------------|-------------|
| H  | 0.07539300  | 7.69287500  | 0.68524900  |
| H  | -0.58086400 | 7.73058900  | -0.96961900 |
| H  | 1.12547500  | 7.29904100  | -0.69713500 |
| C  | -0.26025600 | 5.82111400  | -0.18222000 |
| N  | -0.55541900 | 4.70234400  | -0.09026500 |
| C  | -4.90245500 | 0.78329900  | -0.49130200 |
| C  | -4.77585000 | 1.26010800  | 0.83333300  |
| C  | -3.63538400 | 1.94658500  | 1.14936000  |
| C  | -2.61634700 | 2.17502300  | 0.19740600  |
| C  | -3.94074200 | 1.03037700  | -1.43019500 |
| H  | -5.55712500 | 1.08073300  | 1.56671200  |
| H  | -3.95060500 | 0.66173900  | -2.45171700 |
| N  | -2.88810600 | 1.83741300  | -1.09740500 |
| O  | -1.83064000 | 1.84189900  | -1.89112700 |
| H  | -1.87333500 | 2.95211500  | 0.34527000  |
| Cl | -3.34110300 | 2.52841600  | 2.75719500  |
| Cl | -6.30523000 | -0.14332100 | -0.93393600 |

**SMD-M06/6-31G(d,p)/SDD**

Electronic Energy (0K) = -3765.560179

Electronic Energy (0K) + ZPE = -3764.870384

Enthalpy (353K) = -3764.792835

Free Energy (353K) = -3764.997117

**SMD-M06/6-311++G(d,p)/SDD**

Electronic Energy (0K) = -3766.192892

**B8-1**

Number of imaginary frequencies: 0

|   |             |            |             |
|---|-------------|------------|-------------|
| C | -0.06633500 | 3.01637800 | -1.31154200 |
| C | 0.35399100  | 1.96076900 | -1.74404300 |
| N | 0.81863500  | 0.78413800 | -2.18853100 |

|   |             |             |             |
|---|-------------|-------------|-------------|
| C | -0.02765500 | -0.41320600 | -2.19078600 |
| C | 0.20187300  | -1.31097000 | -1.00366000 |
| C | 0.29350600  | -1.08862700 | 0.34730900  |
| C | 0.44369900  | 0.21023100  | 1.06247900  |
| C | 1.72663600  | 0.53939700  | 1.51947700  |
| C | -0.59072600 | 1.13263200  | 1.30376600  |
| C | 1.96592600  | 1.69496900  | 2.25066600  |
| H | 2.55398500  | -0.12663400 | 1.28704300  |
| C | -0.35547500 | 2.28039400  | 2.05927200  |
| C | 0.91387000  | 2.55477000  | 2.54876800  |
| H | 2.97709200  | 1.91720400  | 2.58665200  |
| H | -1.17459800 | 2.97658000  | 2.22519900  |
| S | 2.38598000  | 0.74229500  | -2.90005100 |
| O | 2.40366900  | 1.74465600  | -3.95328600 |
| O | 2.59951000  | -0.66736000 | -3.19408900 |
| C | 3.46113500  | 1.26668800  | -1.60504500 |
| C | 3.59381600  | 2.63078700  | -1.33918800 |
| C | 4.15246900  | 0.30912800  | -0.86913800 |
| C | 4.42083100  | 3.02697700  | -0.29946700 |
| H | 3.06585100  | 3.36722800  | -1.94048800 |
| C | 4.98657700  | 0.73075800  | 0.15882400  |
| H | 4.03747900  | -0.75028900 | -1.09140500 |
| C | 5.12673800  | 2.08763900  | 0.46305300  |
| H | 4.53074800  | 4.08682000  | -0.07468600 |
| H | 5.53494200  | -0.00841400 | 0.74217700  |
| C | 6.02225800  | 2.53811800  | 1.57275200  |
| H | 6.24977300  | 1.72016600  | 2.26382100  |
| H | 6.97527800  | 2.91145900  | 1.17636500  |
| H | 5.56868700  | 3.35926100  | 2.13938900  |
| H | -1.06423700 | -0.06064600 | -2.23417800 |



|   |             |             |             |
|---|-------------|-------------|-------------|
| H | 0.15580200  | -0.99537600 | -3.09849300 |
| C | -0.50599400 | 4.21790700  | -0.68498500 |
| C | -1.86180700 | 4.57721100  | -0.68978300 |
| C | 0.41690700  | 5.02217000  | 0.00270700  |
| C | -2.28430700 | 5.71023900  | -0.00511500 |
| H | -2.57855100 | 3.95787700  | -1.22654300 |
| C | -0.01224300 | 6.16226600  | 0.66749800  |
| H | 1.46398800  | 4.72375900  | 0.02491500  |
| C | -1.36322500 | 6.50603700  | 0.67158800  |
| H | -3.33892600 | 5.97570000  | -0.00439800 |
| H | 0.70934100  | 6.78066200  | 1.19651900  |
| H | -1.69751100 | 7.39380500  | 1.20326700  |
| N | -1.85369900 | 0.96005000  | 0.67731800  |
| H | -1.85071100 | 1.01953900  | -0.33581300 |
| C | -3.06902000 | 1.07142200  | 1.31218200  |
| O | -3.17316100 | 1.15998200  | 2.52682400  |
| C | -4.25319100 | 0.96130200  | 0.40996300  |
| C | -5.41933600 | 0.42364500  | 0.96040000  |
| C | -4.23639000 | 1.33286700  | -0.93853900 |
| C | -6.54664200 | 0.23585300  | 0.17058100  |
| H | -5.42172800 | 0.15042700  | 2.01354600  |
| C | -5.37246800 | 1.16317600  | -1.72287200 |
| H | -3.35094500 | 1.78388400  | -1.38876800 |
| C | -6.52479300 | 0.60659600  | -1.17211900 |
| H | -7.44615500 | -0.19508400 | 0.60352800  |
| H | -5.35944200 | 1.47177500  | -2.76564200 |
| H | -7.41029100 | 0.46989500  | -1.78882600 |
| H | 1.08559600  | 3.46208700  | 3.12330700  |
| N | -2.97665600 | -1.94659300 | -1.45250500 |
| N | -2.38022300 | -1.82175200 | 1.93925000  |

|    |             |             |             |
|----|-------------|-------------|-------------|
| C  | -3.73262900 | -2.17015800 | -2.29919000 |
| C  | -2.62674200 | -1.66291300 | 3.05851500  |
| C  | -4.67293200 | -2.45110200 | -3.35422500 |
| C  | -2.92400700 | -1.45928000 | 4.45351500  |
| H  | -4.18655600 | -2.33631500 | -4.32733300 |
| H  | -5.04386000 | -3.47546100 | -3.25391100 |
| H  | -5.51590300 | -1.75634700 | -3.28757700 |
| H  | -3.95095100 | -1.09775800 | 4.56212000  |
| H  | -2.80822700 | -2.39885100 | 5.00172700  |
| H  | -2.23741700 | -0.71113600 | 4.86192300  |
| Cu | -1.78939800 | -1.58056400 | 0.05720400  |
| C  | -0.73969500 | -5.35209100 | -2.17698900 |
| H  | 0.34320100  | -5.49012500 | -2.10357900 |
| H  | -0.94771400 | -4.57423300 | -2.91843700 |
| H  | -1.19698300 | -6.28999900 | -2.50571400 |
| C  | -1.27741300 | -4.96161000 | -0.89160100 |
| N  | -1.72226500 | -4.64515400 | 0.13452000  |
| C  | 3.53749700  | -2.93592900 | 0.48997800  |
| C  | 3.07313700  | -2.72000200 | 1.84674600  |
| C  | 1.76870900  | -2.48996200 | 2.03331200  |
| C  | 0.76560400  | -2.46970600 | 0.91983900  |
| C  | 2.67598000  | -3.06569300 | -0.53168000 |
| H  | 3.77669600  | -2.73934700 | 2.67500000  |
| H  | 2.96547800  | -3.22826600 | -1.56624500 |
| N  | 1.29891400  | -3.15062500 | -0.27650400 |
| O  | 0.58743600  | -2.57845400 | -1.37699600 |
| H  | -0.11842200 | -3.03741400 | 1.24703800  |
| Cl | 1.10619000  | -2.18143800 | 3.60991500  |
| Cl | 5.25620200  | -3.07399100 | 0.22223900  |

**SMD-M06/6-31G(d,p)/SDD**

Electronic Energy (0K) = -3765.607289

Electronic Energy (0K) + ZPE = -3764.913473

Enthalpy (353K) = -3764.836890

Free Energy (353K) = -3765.035220

**SMD-M06/6-311++G(d,p)/SDD**

Electronic Energy (0K) = -3766.192892

**TS<sub>B</sub>**

Number of imaginary frequencies: 1

|   |             |             |             |
|---|-------------|-------------|-------------|
| C | 2.26154300  | -1.73460700 | -1.77972400 |
| C | 1.04593700  | -1.70867600 | -1.76295400 |
| N | -0.29527900 | -1.73112000 | -1.67073900 |
| C | -1.03586300 | -0.45637800 | -1.76034300 |
| C | -0.79124500 | 0.49326500  | -0.63024900 |
| C | -1.74408700 | 1.49015100  | -0.44941200 |
| C | -1.73844800 | 2.49048200  | 0.66076200  |
| C | -2.90625500 | 2.68670700  | 1.40704100  |
| C | -0.61830000 | 3.29328800  | 0.96111400  |
| C | -2.95756700 | 3.58502800  | 2.46371100  |
| H | -3.79905800 | 2.11651100  | 1.16283100  |
| C | -0.67406800 | 4.20380500  | 2.02103900  |
| C | -1.82963700 | 4.33609800  | 2.77708300  |
| H | -3.87591800 | 3.69994500  | 3.03401000  |
| H | 0.19557500  | 4.81533000  | 2.23317100  |
| S | -0.91609700 | -2.97968000 | -0.64692600 |
| O | -0.54066600 | -4.22845400 | -1.28777100 |
| O | -2.31574400 | -2.62831900 | -0.43837700 |
| C | -0.02391800 | -2.83905400 | 0.87183700  |
| C | 1.21839800  | -3.46038300 | 0.97701200  |
| C | -0.52815500 | -2.04187400 | 1.90131400  |

|   |             |             |             |
|---|-------------|-------------|-------------|
| C | 1.97451800  | -3.25683300 | 2.12465100  |
| H | 1.58621400  | -4.09407100 | 0.17398300  |
| C | 0.23656700  | -1.86423400 | 3.04462500  |
| H | -1.51015500 | -1.58186600 | 1.81616400  |
| C | 1.50269900  | -2.45145900 | 3.16469900  |
| H | 2.95103200  | -3.73066500 | 2.21398400  |
| H | -0.14652600 | -1.25086600 | 3.85871000  |
| C | 2.33068000  | -2.20457900 | 4.38531200  |
| H | 1.87775700  | -2.67076700 | 5.26940500  |
| H | 3.34287000  | -2.60672400 | 4.27462800  |
| H | 2.40378000  | -1.13057800 | 4.59742300  |
| H | -0.68752600 | 0.02383300  | -2.68795400 |
| H | -2.08687600 | -0.70819500 | -1.93756000 |
| C | 3.68309800  | -1.76572700 | -1.70938800 |
| C | 4.42748000  | -0.57496600 | -1.73192200 |
| C | 4.35298400  | -2.99215100 | -1.57259100 |
| C | 5.81261900  | -0.61916200 | -1.63470800 |
| H | 3.91154400  | 0.38014500  | -1.83421300 |
| C | 5.73744000  | -3.02215800 | -1.46150400 |
| H | 3.77742900  | -3.91556800 | -1.56217300 |
| C | 6.47219800  | -1.83883700 | -1.49549500 |
| H | 6.37934800  | 0.30991600  | -1.66377400 |
| H | 6.24643700  | -3.97744500 | -1.35574600 |
| H | 7.55640900  | -1.86721500 | -1.41685600 |
| N | 0.52263300  | 3.23249300  | 0.13752400  |
| H | 0.37148500  | 2.86985900  | -0.79555600 |
| C | 1.82384600  | 3.37654600  | 0.55137500  |
| O | 2.13059400  | 3.60502800  | 1.71481700  |
| C | 2.86352100  | 3.21554100  | -0.51133400 |
| C | 4.18793900  | 3.09741100  | -0.07798600 |

|    |             |             |             |
|----|-------------|-------------|-------------|
| C  | 2.59028400  | 3.19507000  | -1.88340900 |
| C  | 5.22039800  | 2.95146100  | -0.99464800 |
| H  | 4.38748400  | 3.13446700  | 0.99046800  |
| C  | 3.62588200  | 3.04939800  | -2.80145900 |
| H  | 1.57747800  | 3.33053100  | -2.25979700 |
| C  | 4.94048100  | 2.92473100  | -2.35990700 |
| H  | 6.24733600  | 2.86413300  | -0.64553500 |
| H  | 3.40472600  | 3.04470700  | -3.86593400 |
| H  | 5.74784500  | 2.81265500  | -3.08041500 |
| H  | -1.85327700 | 5.04923800  | 3.59767000  |
| Cu | 0.81920500  | 0.30194200  | 0.35686500  |
| C  | 4.94612900  | -0.36452900 | 1.93388500  |
| H  | 5.18599700  | -1.41357800 | 1.72851500  |
| H  | 5.05828200  | -0.16782300 | 3.00468600  |
| H  | 5.63466800  | 0.27799300  | 1.37427100  |
| C  | 3.59328400  | -0.09142800 | 1.52224800  |
| N  | 2.50741000  | 0.12237300  | 1.18597200  |
| C  | -6.33679700 | 0.19192100  | -1.37086900 |
| C  | -6.31648600 | -0.81905600 | -0.41399800 |
| C  | -5.13825600 | -1.04813200 | 0.28756400  |
| C  | -4.01485900 | -0.27561400 | 0.01765700  |
| C  | -5.19829700 | 0.95066400  | -1.61359700 |
| H  | -7.20357100 | -1.41568800 | -0.21981600 |
| H  | -5.13270200 | 1.75695000  | -2.34018800 |
| N  | -4.12223400 | 0.66370500  | -0.89751500 |
| O  | -2.74307200 | 1.58519400  | -1.31951600 |
| H  | -3.04611200 | -0.39415200 | 0.51431300  |
| Cl | -5.05188900 | -2.28108900 | 1.49059000  |
| Cl | -7.77823300 | 0.52034900  | -2.26479600 |

**SMD-M06/6-31G(d,p)/SDD**

Electronic Energy (0K) = -3500.225122

Electronic Energy (0K) + ZPE = -3499.628537

Enthalpy (353K) = -3499.564795

Free Energy (353K) = -3499.733395

**SMD-M06/6-311++G(d,p)/SDD**

Electronic Energy (0K) = -3500.782782

[N] (*Cu catalysis system*)

Number of imaginary frequencies: 0

|    |             |             |             |
|----|-------------|-------------|-------------|
| C  | 1.17991300  | -0.01061700 | -0.00005100 |
| C  | -0.00000100 | -0.74065100 | -0.00006700 |
| C  | -1.17991800 | -0.01059900 | -0.00003800 |
| C  | -1.14650100 | 1.38061400  | -0.00000400 |
| C  | 1.14649700  | 1.38061100  | -0.00002000 |
| H  | -0.00002000 | -1.82748600 | -0.00006000 |
| H  | 2.07429700  | 1.95191400  | 0.00007700  |
| N  | 0.00000700  | 2.05648800  | 0.00001800  |
| H  | -2.07428600 | 1.95193800  | 0.00006200  |
| Cl | -2.71554600 | -0.83729300 | 0.00002400  |
| Cl | 2.71554700  | -0.83729100 | 0.00002800  |

**SMD-M06/6-31G(d,p)/SDD**

Electronic Energy (0K) = -1167.231701

Electronic Energy (0K) + ZPE = -1167.162272

Enthalpy (353K) = -1167.152324

Free Energy (353K) = -1167.200977

**SMD-M06/6-311++G(d,p)/SDD**

Electronic Energy (0K) = -1167.348389

C

Number of imaginary frequencies: 0

|   |             |             |             |
|---|-------------|-------------|-------------|
| C | 3.30070100  | 0.20200000  | -1.25934900 |
| C | 2.73021500  | -0.85599000 | -1.43665000 |
| N | 2.06676200  | -2.01362000 | -1.62440300 |
| C | 0.67017600  | -1.91324000 | -2.06249500 |
| C | -0.19916100 | -1.07197000 | -1.23450100 |
| C | -1.60393800 | -0.95118900 | -1.61318600 |
| C | -2.68109600 | -1.74052500 | -0.98671700 |
| C | -2.54891400 | -3.13089300 | -0.89739300 |
| C | -3.87406500 | -1.13248400 | -0.55333300 |
| C | -3.60030600 | -3.91591800 | -0.44260300 |
| H | -1.62668800 | -3.61119700 | -1.21962900 |
| C | -4.92210500 | -1.92629700 | -0.09802600 |
| C | -4.79194500 | -3.31009500 | -0.05648000 |
| H | -3.49082600 | -4.99576700 | -0.39630800 |
| H | -5.83634600 | -1.44364900 | 0.24061500  |
| S | 2.37172500  | -3.26116300 | -0.45014500 |
| O | 3.80496400  | -3.22677600 | -0.23044900 |
| O | 1.69685700  | -4.43104400 | -0.98935300 |
| C | 1.51624200  | -2.70333400 | 0.98636200  |
| C | 2.09577800  | -1.70080700 | 1.76906600  |
| C | 0.23151300  | -3.17888200 | 1.24467100  |
| C | 1.35678200  | -1.16354000 | 2.81140200  |
| H | 3.10697700  | -1.35332000 | 1.56786500  |
| C | -0.48993100 | -2.62313900 | 2.29540400  |
| H | -0.19082500 | -3.97822900 | 0.64011100  |
| C | 0.05155800  | -1.59980300 | 3.07796000  |
| H | 1.79254500  | -0.38128100 | 3.43116300  |
| H | -1.49438900 | -2.98622700 | 2.50776300  |
| C | -0.73956100 | -0.95922000 | 4.17231800  |
| H | -1.68823300 | -1.47686700 | 4.34219700  |

|   |             |             |             |
|---|-------------|-------------|-------------|
| H | -0.17671700 | -0.94449900 | 5.11288700  |
| H | -0.96478000 | 0.08548200  | 3.91895600  |
| H | 0.64567200  | -1.44437400 | -3.06547600 |
| H | 0.27861500  | -2.92756600 | -2.22955000 |
| C | 3.95482600  | 1.43956600  | -1.00020400 |
| C | 3.43813000  | 2.63760800  | -1.51986400 |
| C | 5.10085600  | 1.47599800  | -0.19081600 |
| C | 4.06656600  | 3.84451500  | -1.24139600 |
| H | 2.54549700  | 2.60708600  | -2.14244000 |
| C | 5.71869300  | 2.69002900  | 0.08392400  |
| H | 5.49928800  | 0.54662700  | 0.21120700  |
| C | 5.20694100  | 3.87571600  | -0.44019800 |
| H | 3.66359300  | 4.76704400  | -1.65320200 |
| H | 6.60963900  | 2.70894200  | 0.70733200  |
| H | 5.69815600  | 4.82228500  | -0.22743300 |
| N | -4.03472300 | 0.26857800  | -0.54640500 |
| H | -4.90980400 | 0.63285200  | -0.90572900 |
| C | -3.13510200 | 1.13880100  | -0.00564800 |
| O | -2.07469200 | 0.75553800  | 0.49146100  |
| C | -3.49133600 | 2.57987800  | -0.07055600 |
| C | -2.43890700 | 3.49888000  | -0.10578300 |
| C | -4.81166000 | 3.03846400  | -0.07960100 |
| C | -2.70358100 | 4.86019700  | -0.17537200 |
| H | -1.41577700 | 3.12734700  | -0.09069200 |
| C | -5.07292400 | 4.40258800  | -0.13373700 |
| H | -5.64367200 | 2.34004000  | -0.00810100 |
| C | -4.02098700 | 5.31310100  | -0.18871800 |
| H | -1.88203100 | 5.57142400  | -0.21816600 |
| H | -6.10107900 | 4.75570600  | -0.12784700 |
| H | -4.22874600 | 6.37952100  | -0.23696200 |



|    |             |             |             |
|----|-------------|-------------|-------------|
| H  | -5.62216500 | -3.91529500 | 0.29870500  |
| Cu | 0.33785400  | 0.21924900  | 0.01085000  |
| C  | 2.32865900  | 3.73337500  | 1.95928600  |
| H  | 3.40128700  | 3.57485600  | 1.79893000  |
| H  | 2.12686200  | 3.81744400  | 3.03133100  |
| H  | 2.02325000  | 4.65788500  | 1.45947200  |
| C  | 1.59712600  | 2.62219400  | 1.41020600  |
| N  | 1.01474700  | 1.72671000  | 0.96652700  |
| O  | -1.75558400 | -0.07785300 | -2.46380600 |

**SMD-M06/6-31G(d,p)/SDD**

Electronic Energy (0K) = -2333.039134

Electronic Energy (0K) + ZPE = -2332.515180

Enthalpy (353K) = -2332.460128

Free Energy (353K) = -2332.612874

**SMD-M06/6-311++G(d,p)/SDD**

Electronic Energy (0K) = -2333.480447

**TS<sub>C</sub>**

Number of imaginary frequencies: 1

|   |             |             |             |
|---|-------------|-------------|-------------|
| C | -0.44119500 | -1.78153700 | 0.56391700  |
| C | -1.60856800 | -2.29374200 | 0.26362800  |
| N | -2.23347200 | -2.25883700 | -0.89715100 |
| C | -1.54919000 | -1.52469400 | -2.00266100 |
| C | -0.29883600 | -0.94209000 | -1.56673500 |
| C | 0.48684100  | -0.07879700 | -2.38836900 |
| C | 0.31955900  | 1.30168000  | -1.79062000 |
| C | -0.91484500 | 1.97973600  | -1.90382100 |
| C | 1.42786700  | 1.94491900  | -1.17745400 |
| C | -1.05554600 | 3.26543100  | -1.39813000 |
| H | -1.74542200 | 1.48381400  | -2.40503900 |

|   |             |             |             |
|---|-------------|-------------|-------------|
| C | 1.26145600  | 3.23126800  | -0.66353100 |
| C | 0.03380000  | 3.87631500  | -0.78019700 |
| H | -2.00106500 | 3.79188200  | -1.49677300 |
| H | 2.10113200  | 3.73214200  | -0.19458600 |
| S | -3.98388400 | -2.20845700 | -0.87644400 |
| O | -4.40059500 | -3.25123000 | 0.03961700  |
| O | -4.37328800 | -2.21049900 | -2.27634100 |
| C | -4.24200500 | -0.61399600 | -0.16527900 |
| C | -4.20025900 | -0.48740000 | 1.22269000  |
| C | -4.31125500 | 0.50221500  | -0.99990100 |
| C | -4.20150000 | 0.78635300  | 1.77504900  |
| H | -4.16305200 | -1.36921000 | 1.85757800  |
| C | -4.31237500 | 1.76511000  | -0.42396200 |
| H | -4.37454300 | 0.38236900  | -2.07965500 |
| C | -4.22723700 | 1.92605900  | 0.96457000  |
| H | -4.16946300 | 0.89970800  | 2.85723200  |
| H | -4.37424000 | 2.64581200  | -1.06163400 |
| C | -4.11842000 | 3.29435300  | 1.55691900  |
| H | -3.09691800 | 3.68075600  | 1.42312900  |
| H | -4.79301500 | 4.00232600  | 1.06283900  |
| H | -4.33899100 | 3.29359400  | 2.62917000  |
| H | -1.30924900 | -2.21338100 | -2.83358100 |
| H | -2.26766700 | -0.80514100 | -2.42300000 |
| C | 0.76832600  | -2.17489300 | 1.25074700  |
| C | 1.77931100  | -1.24855400 | 1.54849000  |
| C | 0.93918900  | -3.51853500 | 1.62724700  |
| C | 2.93621500  | -1.65492100 | 2.19720000  |
| H | 1.64967300  | -0.20156700 | 1.26919100  |
| C | 2.09249500  | -3.91609200 | 2.28702800  |
| H | 0.15425700  | -4.23693700 | 1.40098500  |

|    |             |             |             |
|----|-------------|-------------|-------------|
| C  | 3.09398600  | -2.98844000 | 2.56845500  |
| H  | 3.71453200  | -0.92802500 | 2.41867500  |
| H  | 2.21456600  | -4.95636900 | 2.57833700  |
| H  | 3.99916400  | -3.30566800 | 3.08068500  |
| N  | 2.64684200  | 1.27041100  | -1.15243100 |
| H  | 2.78886000  | 0.58466500  | -1.88673500 |
| C  | 3.58140600  | 1.35220300  | -0.13621900 |
| O  | 3.35897600  | 1.97031600  | 0.89537200  |
| C  | 4.85562200  | 0.61874800  | -0.37092700 |
| C  | 5.70518300  | 0.45748500  | 0.72859800  |
| C  | 5.24405700  | 0.11553800  | -1.61738200 |
| C  | 6.91201600  | -0.21397700 | 0.59194100  |
| H  | 5.40047300  | 0.87112600  | 1.68712400  |
| C  | 6.45499100  | -0.55269100 | -1.75264100 |
| H  | 4.62954700  | 0.26028800  | -2.50383500 |
| C  | 7.28714000  | -0.72267400 | -0.64960200 |
| H  | 7.56420000  | -0.33843100 | 1.45289000  |
| H  | 6.75216500  | -0.93580800 | -2.72562600 |
| H  | 8.23353500  | -1.24700200 | -0.75986400 |
| H  | -0.06597400 | 4.88596500  | -0.38896400 |
| Cu | -0.55287200 | 0.21649200  | 0.08561300  |
| C  | -1.05357300 | 2.74091800  | 3.88130000  |
| H  | -1.93188800 | 2.39933700  | 4.43739200  |
| H  | -1.16854400 | 3.80025400  | 3.63304900  |
| H  | -0.16278800 | 2.61163900  | 4.50346500  |
| C  | -0.91078700 | 1.96878200  | 2.67396200  |
| N  | -0.79537400 | 1.34421500  | 1.70771500  |
| O  | 1.26577800  | -0.34684700 | -3.29426000 |

**SMD-M06/6-31G(d,p)/SDD**

Electronic Energy (0K) = -2333.000815

Electronic Energy (0K) + ZPE = -2332.476333

Enthalpy (353K) = -2332.423167

Free Energy (353K) = -2332.568083

**SMD-M06/6-311++G(d,p)/SDD**

Electronic Energy (0K) = -2333.439838

**D**

Number of imaginary frequencies: 0

|   |             |             |             |
|---|-------------|-------------|-------------|
| C | -0.50428100 | -1.52029000 | 0.45313300  |
| C | -1.77661700 | -2.22043100 | 0.11930600  |
| N | -1.99236900 | -1.89118200 | -1.14277800 |
| C | -1.04594400 | -0.94924700 | -1.76010900 |
| C | -0.13281000 | -0.69389800 | -0.61207500 |
| C | 1.23213000  | -0.09349400 | -0.85062200 |
| C | 1.43745000  | 1.35519900  | -0.85385100 |
| C | 0.32553800  | 2.21406300  | -0.93478000 |
| C | 2.74262600  | 1.92708400  | -0.77674800 |
| C | 0.46143200  | 3.58778500  | -0.92339100 |
| H | -0.67335400 | 1.78981600  | -1.02285100 |
| C | 2.86511300  | 3.32396300  | -0.75342200 |
| C | 1.74233000  | 4.13208800  | -0.82696400 |
| H | -0.41330800 | 4.22815000  | -0.99478900 |
| H | 3.85246400  | 3.76010800  | -0.67670100 |
| S | -3.53828400 | -2.18379000 | -1.90924200 |
| O | -3.99779300 | -3.47600400 | -1.44461900 |
| O | -3.29531000 | -1.90993100 | -3.31557200 |
| C | -4.49265200 | -0.88844300 | -1.18803500 |
| C | -5.14302200 | -1.12290800 | 0.02389700  |
| C | -4.50024100 | 0.36445000  | -1.79696300 |
| C | -5.81791900 | -0.07265600 | 0.62625400  |

|   |             |             |             |
|---|-------------|-------------|-------------|
| H | -5.12492100 | -2.11063100 | 0.47765300  |
| C | -5.18457300 | 1.40157500  | -1.17422000 |
| H | -3.99833000 | 0.52074700  | -2.74927500 |
| C | -5.84967900 | 1.19934100  | 0.03908100  |
| H | -6.34073200 | -0.23867100 | 1.56665900  |
| H | -5.21422200 | 2.38340500  | -1.64300000 |
| C | -6.60855400 | 2.30833300  | 0.69520200  |
| H | -6.39920600 | 3.27519300  | 0.22697100  |
| H | -7.68895400 | 2.13055000  | 0.62125400  |
| H | -6.37451600 | 2.37361600  | 1.76446400  |
| H | -0.50674900 | -1.41760400 | -2.59623800 |
| H | -1.55861900 | -0.06013700 | -2.15256100 |
| C | 0.23120100  | -1.80719900 | 1.70065200  |
| C | 1.30495000  | -1.01359000 | 2.13485000  |
| C | -0.15233700 | -2.90778500 | 2.47905300  |
| C | 1.97799200  | -1.31912200 | 3.30886200  |
| H | 1.61931800  | -0.13928500 | 1.56680600  |
| C | 0.53062000  | -3.21484300 | 3.64960600  |
| H | -0.98473600 | -3.52446000 | 2.15027300  |
| C | 1.59561500  | -2.42316000 | 4.06841900  |
| H | 2.80595700  | -0.69279300 | 3.63145100  |
| H | 0.22766500  | -4.07848200 | 4.23652300  |
| H | 2.12756000  | -2.66332700 | 4.98585400  |
| N | 3.84526200  | 1.08659200  | -0.72638100 |
| H | 3.61828700  | 0.10154600  | -0.84156900 |
| C | 5.16287000  | 1.41172300  | -0.47027400 |
| O | 5.53957700  | 2.53571500  | -0.17250800 |
| C | 6.11530800  | 0.26682300  | -0.56530300 |
| C | 7.36023400  | 0.42904400  | 0.04967800  |
| C | 5.83817900  | -0.92115500 | -1.25044100 |

|    |             |             |             |
|----|-------------|-------------|-------------|
| C  | 8.30571500  | -0.58597700 | 0.00208300  |
| H  | 7.56780700  | 1.36272200  | 0.56650500  |
| C  | 6.78985200  | -1.93316000 | -1.30363600 |
| H  | 4.89429900  | -1.06494200 | -1.77418900 |
| C  | 8.02076300  | -1.77009600 | -0.67420200 |
| H  | 9.26785000  | -0.45412600 | 0.49128100  |
| H  | 6.56984600  | -2.85030900 | -1.84452000 |
| H  | 8.76136400  | -2.56555300 | -0.71569900 |
| H  | 1.87395100  | 5.21156800  | -0.81652900 |
| Cu | -1.36744000 | 0.29976200  | 0.91134100  |
| C  | -3.45450500 | 3.96798100  | 2.42717500  |
| H  | -4.11930000 | 3.71327100  | 3.25800900  |
| H  | -4.03503700 | 4.42930700  | 1.62246600  |
| H  | -2.69704100 | 4.67568200  | 2.77747600  |
| C  | -2.81083900 | 2.77737100  | 1.93991600  |
| N  | -2.29468800 | 1.82128100  | 1.54504600  |
| O  | 2.11700500  | -0.92738900 | -1.03489300 |

**SMD-M06/6-31G(d,p)/SDD**

Electronic Energy (0K) = -2333.099670

Electronic Energy (0K) + ZPE = -2332.571172

Enthalpy (353K) = -2332.517871

Free Energy (353K) = -2332.667218

**SMD-M06/6-311++G(d,p)/SDD**

Electronic Energy (0K) = -2333.538492

**E**

Number of imaginary frequencies: 0

|   |             |             |             |
|---|-------------|-------------|-------------|
| C | -0.49820200 | 1.01474200  | -0.12119100 |
| C | -1.80281000 | 0.82372200  | 0.50853100  |
| N | -1.70307200 | -0.27958700 | 1.23893000  |

|   |             |             |             |
|---|-------------|-------------|-------------|
| C | -0.39807300 | -0.93182300 | 1.15389800  |
| C | 0.32001400  | -0.01193100 | 0.24047600  |
| C | 1.79186000  | -0.14972000 | -0.01625000 |
| C | 2.26289900  | -1.22885200 | -0.88360900 |
| C | 1.31421900  | -1.94359000 | -1.63639400 |
| C | 3.64208400  | -1.56562800 | -1.00583700 |
| C | 1.68396500  | -2.97347400 | -2.47865700 |
| H | 0.26561900  | -1.65866700 | -1.56795300 |
| C | 4.00223000  | -2.62350000 | -1.85227100 |
| C | 3.03498200  | -3.30861500 | -2.57103800 |
| H | 0.93692300  | -3.50868800 | -3.05754900 |
| H | 5.04662600  | -2.89424900 | -1.93577400 |
| S | -3.00140500 | -0.99501000 | 2.16819100  |
| O | -3.94190600 | 0.08227700  | 2.41608900  |
| O | -2.31183800 | -1.68048900 | 3.24508400  |
| C | -3.68737100 | -2.15511600 | 1.04070000  |
| C | -4.69015900 | -1.73491700 | 0.16781800  |
| C | -3.19692100 | -3.46067600 | 1.02990300  |
| C | -5.20799000 | -2.65271800 | -0.73383100 |
| H | -5.06645000 | -0.71473700 | 0.20362500  |
| C | -3.73246000 | -4.35878800 | 0.11934700  |
| H | -2.42242500 | -3.76816300 | 1.72842400  |
| C | -4.74106400 | -3.97153600 | -0.77082900 |
| H | -5.99530000 | -2.34642900 | -1.41974400 |
| H | -3.36696400 | -5.38367900 | 0.09798900  |
| C | -5.32852000 | -4.96223400 | -1.72319200 |
| H | -4.56975600 | -5.65975100 | -2.09346600 |
| H | -6.10016600 | -5.56216100 | -1.22352800 |
| H | -5.80002300 | -4.46824400 | -2.57848800 |
| H | 0.06976400  | -0.99597500 | 2.14560900  |

|    |             |             |             |
|----|-------------|-------------|-------------|
| C  | -0.18938700 | 2.14682200  | -1.00515700 |
| C  | -0.71758100 | 3.41650400  | -0.73822800 |
| C  | 0.64048700  | 1.97923900  | -2.11955500 |
| C  | -0.41527600 | 4.49365800  | -1.56299500 |
| H  | -1.35354700 | 3.56154000  | 0.13552800  |
| C  | 0.94075900  | 3.05770400  | -2.94309000 |
| H  | 1.03380900  | 0.99209800  | -2.35910200 |
| C  | 0.41459000  | 4.31692900  | -2.66714200 |
| H  | -0.82435900 | 5.47594300  | -1.33836600 |
| H  | 1.58226100  | 2.91118100  | -3.80873500 |
| H  | 0.65010300  | 5.15951900  | -3.31297500 |
| N  | 4.57522200  | -0.82905400 | -0.28926300 |
| H  | 4.16499700  | -0.07613000 | 0.26010100  |
| C  | 5.93550700  | -1.03020800 | -0.18594700 |
| O  | 6.52565000  | -1.97581800 | -0.68866200 |
| C  | 6.65676900  | 0.00346800  | 0.61390200  |
| C  | 7.92282900  | -0.33936300 | 1.09734500  |
| C  | 6.14901600  | 1.28218200  | 0.86622500  |
| C  | 8.66151100  | 0.57084700  | 1.84069800  |
| H  | 8.31168300  | -1.33134500 | 0.88112400  |
| C  | 6.89450900  | 2.19538100  | 1.60323500  |
| H  | 5.18412400  | 1.59299600  | 0.46877700  |
| C  | 8.14731100  | 1.84021500  | 2.09565000  |
| H  | 9.64135900  | 0.29197400  | 2.22092300  |
| H  | 6.49697100  | 3.19054100  | 1.78710600  |
| H  | 8.72649800  | 2.55640000  | 2.67407600  |
| H  | 3.34743300  | -4.12018400 | -3.22435700 |
| O  | 2.51290300  | 0.65302800  | 0.57529400  |
| H  | -0.49331800 | -1.95489200 | 0.76020600  |
| Cu | -3.33867500 | 1.90963200  | 0.29771600  |



|   |             |            |             |
|---|-------------|------------|-------------|
| C | -6.92813800 | 4.49729000 | -0.34415000 |
| H | -6.83334200 | 5.02947800 | -1.29523200 |
| H | -6.99795100 | 5.22350600 | 0.47142800  |
| H | -7.83407500 | 3.88427800 | -0.35997300 |
| C | -5.77770300 | 3.65690900 | -0.14273200 |
| N | -4.85189900 | 2.98366300 | 0.01880200  |

**SMD-M06/6-31G(d,p)/SDD**

Electronic Energy (0K) = -2333.151871

Electronic Energy (0K) + ZPE = -2332.623781

Enthalpy (353K) = -2332.569801

Free Energy (353K) = -2332.724593

**SMD-M06/6-311++G(d,p)/SDD**

Electronic Energy (0K) = -2333.588321

**F**

Number of imaginary frequencies: 0

|   |             |             |             |
|---|-------------|-------------|-------------|
| C | 0.55346900  | 1.38278700  | -0.84263900 |
| C | 1.69152500  | 1.25575700  | -1.64900800 |
| N | 1.65985900  | -0.01708000 | -2.21950700 |
| C | 0.60892100  | -0.72835700 | -1.69477100 |
| C | -0.10704100 | 0.08862600  | -0.85870100 |
| C | -1.43340100 | -0.22664200 | -0.27067700 |
| C | -1.62520600 | -1.52260300 | 0.40565500  |
| C | -0.50161100 | -2.25719600 | 0.82461100  |
| C | -2.92279300 | -2.04426000 | 0.68185500  |
| C | -0.62298200 | -3.47820400 | 1.46183600  |
| H | 0.48963000  | -1.83950500 | 0.66427200  |
| C | -3.03224800 | -3.29443000 | 1.30591800  |
| C | -1.89768700 | -3.99470800 | 1.68523300  |
| H | 0.26186400  | -4.02193300 | 1.78153400  |

|   |             |             |             |
|---|-------------|-------------|-------------|
| H | -4.01858200 | -3.70042400 | 1.48999600  |
| S | 3.08485000  | -0.76372800 | -2.85882800 |
| O | 3.73647200  | 0.27637500  | -3.63000100 |
| O | 2.61349700  | -1.99779400 | -3.45530800 |
| C | 3.99487000  | -1.08683100 | -1.38600200 |
| C | 4.95153900  | -0.16475300 | -0.96803100 |
| C | 3.67346400  | -2.21401800 | -0.63023900 |
| C | 5.60432500  | -0.38906900 | 0.23634300  |
| H | 5.18488400  | 0.70466300  | -1.57858600 |
| C | 4.33142300  | -2.40995700 | 0.57536700  |
| H | 2.92984600  | -2.92738600 | -0.98049200 |
| C | 5.30144000  | -1.50451200 | 1.02428400  |
| H | 6.35871300  | 0.31716300  | 0.57814700  |
| H | 4.09668300  | -3.28477800 | 1.17924000  |
| C | 6.00906800  | -1.73689500 | 2.32044500  |
| H | 5.33857700  | -2.17406100 | 3.06862300  |
| H | 6.83828100  | -2.44346300 | 2.18513700  |
| H | 6.43445000  | -0.81051500 | 2.72095900  |
| H | 0.44240400  | -1.76260300 | -1.97577100 |
| C | 0.08813100  | 2.64531400  | -0.23482900 |
| C | 0.25592800  | 3.85129500  | -0.92412400 |
| C | -0.48412200 | 2.66162800  | 1.04428000  |
| C | -0.14112800 | 5.05112000  | -0.34370700 |
| H | 0.67896800  | 3.84486900  | -1.92692500 |
| C | -0.87814100 | 3.86223800  | 1.61967100  |
| H | -0.60944200 | 1.72969200  | 1.59423600  |
| C | -0.70729600 | 5.05977500  | 0.92749500  |
| H | -0.01352000 | 5.98173200  | -0.89144900 |
| H | -1.31918400 | 3.86385000  | 2.61357800  |
| H | -1.01936900 | 5.99854300  | 1.37884300  |

|    |             |             |             |
|----|-------------|-------------|-------------|
| N  | -4.03834300 | -1.28988800 | 0.33763900  |
| H  | -3.80484200 | -0.36671600 | -0.02420700 |
| C  | -5.36718100 | -1.64905800 | 0.37796700  |
| O  | -5.76627800 | -2.77203000 | 0.65427600  |
| C  | -6.31548200 | -0.54647200 | 0.03858200  |
| C  | -7.60247400 | -0.91469100 | -0.36319000 |
| C  | -5.98940300 | 0.81015300  | 0.13801200  |
| C  | -8.54226800 | 0.05474100  | -0.68593200 |
| H  | -7.84749000 | -1.97238200 | -0.42081000 |
| C  | -6.93522300 | 1.77955800  | -0.17625800 |
| H  | -5.00801300 | 1.12728700  | 0.48731200  |
| C  | -8.20906600 | 1.40435300  | -0.59390100 |
| H  | -9.53790500 | -0.24111100 | -1.00807200 |
| H  | -6.67688600 | 2.83213000  | -0.08864500 |
| H  | -8.94529900 | 2.16537500  | -0.84233900 |
| H  | -2.01609200 | -4.95750800 | 2.17729300  |
| O  | -2.32618500 | 0.61440200  | -0.39660600 |
| Cu | 2.29490200  | 1.07825400  | 0.37892800  |
| C  | 4.18888500  | 1.03400600  | 4.43484600  |
| H  | 3.61727700  | 1.70083800  | 5.08751400  |
| H  | 5.22077500  | 1.39229800  | 4.37120900  |
| H  | 4.17936100  | 0.02399700  | 4.85518300  |
| C  | 3.59758600  | 1.02206200  | 3.12269800  |
| N  | 3.12307400  | 1.01731800  | 2.06818000  |
| H  | 2.34806400  | 2.02562100  | -2.04503800 |

**SMD-M06/6-31G(d,p)/SDD**

Electronic Energy (0K) = -2333.177082

Electronic Energy (0K) + ZPE = -2332.648113

Enthalpy (353K) = -2332.594910

Free Energy (353K) = -2332.743893

**SMD-M06/6-311++G(d,p)/SDD**

Electronic Energy (0K) = -2333.615002

**3a**

Number of imaginary frequencies: 0

|   |             |             |             |
|---|-------------|-------------|-------------|
| C | 0.93496000  | 1.78078300  | -0.32722800 |
| C | 2.10551800  | 1.68049100  | -1.03399100 |
| N | 2.19762200  | 0.39749200  | -1.54870300 |
| C | 1.13264400  | -0.34889500 | -1.11748100 |
| C | 0.31408300  | 0.47144600  | -0.37261600 |
| C | -0.98319100 | 0.04449600  | 0.17883800  |
| C | -1.12370700 | -1.34969500 | 0.67190600  |
| C | 0.00447300  | -2.04242400 | 1.13843200  |
| C | -2.38851100 | -2.00013600 | 0.72604700  |
| C | -0.07651900 | -3.34419700 | 1.60403000  |
| H | 0.96161200  | -1.52881100 | 1.15672500  |
| C | -2.45574400 | -3.32649000 | 1.17108200  |
| C | -1.31256900 | -3.98420100 | 1.60096000  |
| H | 0.81301900  | -3.85162800 | 1.96787200  |
| H | -3.41648600 | -3.82582600 | 1.17987800  |
| S | 3.61687200  | -0.26755400 | -2.25250900 |
| O | 4.23988200  | 0.83250500  | -2.96500000 |
| O | 3.16926300  | -1.47063300 | -2.93009500 |
| C | 4.58384800  | -0.69097100 | -0.84131900 |
| C | 5.52079600  | 0.22283500  | -0.36566600 |
| C | 4.35006000  | -1.90705600 | -0.20102100 |
| C | 6.24443300  | -0.10175300 | 0.77307900  |
| H | 5.68423900  | 1.16516800  | -0.88287100 |
| C | 5.08316300  | -2.20743900 | 0.93717300  |
| H | 3.61280700  | -2.60689000 | -0.58899300 |

|   |             |             |             |
|---|-------------|-------------|-------------|
| C | 6.03879700  | -1.31516800 | 1.43779300  |
| H | 6.98398200  | 0.59833800  | 1.15725800  |
| H | 4.91581100  | -3.15285200 | 1.45007500  |
| C | 6.84371000  | -1.66610000 | 2.64822600  |
| H | 6.28013400  | -2.30941400 | 3.33197000  |
| H | 7.75108400  | -2.21365700 | 2.36167200  |
| H | 7.16259400  | -0.77101600 | 3.19215300  |
| H | 1.01947100  | -1.38413700 | -1.41439800 |
| C | 0.54321400  | 3.01528600  | 0.37806700  |
| C | -0.73953300 | 3.56871100  | 0.28456800  |
| C | 1.51469100  | 3.70011400  | 1.12192400  |
| C | -1.03923700 | 4.76695200  | 0.92357900  |
| H | -1.49821300 | 3.04763800  | -0.29053100 |
| C | 1.21356600  | 4.89915200  | 1.75746800  |
| H | 2.51241900  | 3.27309000  | 1.21217900  |
| C | -0.06705400 | 5.43660400  | 1.66180600  |
| H | -2.04076800 | 5.18348600  | 0.83802500  |
| H | 1.98065300  | 5.41116500  | 2.33459000  |
| H | -0.30681400 | 6.37265100  | 2.16160500  |
| N | -3.52819100 | -1.29204500 | 0.34900200  |
| H | -3.35027700 | -0.30021000 | 0.20146700  |
| C | -4.79278800 | -1.76817700 | 0.10409500  |
| O | -5.09502300 | -2.95471000 | 0.10703600  |
| C | -5.80495100 | -0.70852900 | -0.18964500 |
| C | -6.96686200 | -1.10265800 | -0.85855900 |
| C | -5.65708400 | 0.62655600  | 0.19998100  |
| C | -7.95558000 | -0.17464700 | -1.15659700 |
| H | -7.07521900 | -2.14702800 | -1.14111300 |
| C | -6.65263700 | 1.55254200  | -0.09055500 |
| H | -4.78113400 | 0.95288700  | 0.75862700  |

|   |             |             |             |
|---|-------------|-------------|-------------|
| C | -7.79908900 | 1.15565800  | -0.77344400 |
| H | -8.85165200 | -0.48827700 | -1.68711200 |
| H | -6.53419500 | 2.58682000  | 0.22349900  |
| H | -8.57471000 | 1.88309800  | -1.00210800 |
| H | -1.39723600 | -5.00934400 | 1.95499600  |
| O | -1.93270000 | 0.83483800  | 0.19632000  |
| H | 2.86411600  | 2.42293000  | -1.24907900 |

**SMD-M06/6-31G(d,p)/SDD**

Electronic Energy (0K) = -2003.204222

Electronic Energy (0K) + ZPE = -2002.724196

Enthalpy (353K) = -2002.678743

Free Energy (353K) = -2002.813340

**SMD-M06/6-311++G(d,p)/SDD**

Electronic Energy (0K) = -2003.614949

**1b**

Number of imaginary frequencies: 0

|   |             |             |             |
|---|-------------|-------------|-------------|
| C | -5.13298400 | 1.75734600  | 0.32055300  |
| C | -3.90434200 | 1.21065200  | 0.66711200  |
| C | -3.43148200 | 0.06396500  | 0.00953300  |
| C | -4.21290400 | -0.51433000 | -1.00398000 |
| C | -5.43325800 | 0.04826500  | -1.35234400 |
| C | -5.89913400 | 1.18210100  | -0.69065400 |
| H | -5.49242200 | 2.64308600  | 0.84019100  |
| H | -3.84860900 | -1.40469000 | -1.51222800 |
| H | -6.02806300 | -0.40560900 | -2.14218500 |
| H | -6.85853400 | 1.61700500  | -0.96234400 |
| C | -2.17509500 | -0.51033600 | 0.35930300  |
| C | -1.11205100 | -1.02738700 | 0.63915400  |
| N | 0.05054500  | -1.60019400 | 0.99588800  |

|   |             |             |             |
|---|-------------|-------------|-------------|
| C | 0.64626400  | -1.22173200 | 2.29822900  |
| C | 0.99632000  | 0.19092900  | 2.38618200  |
| C | 1.26788700  | 1.36950400  | 2.43893500  |
| C | 1.61017400  | 2.77846800  | 2.49190300  |
| S | 1.10865000  | -2.11978200 | -0.25785100 |
| O | 0.23751700  | -2.53860500 | -1.34191300 |
| O | 2.02646200  | -3.04844300 | 0.38424800  |
| C | 1.99968100  | -0.67018800 | -0.73498800 |
| C | 1.36434200  | 0.28483200  | -1.53039400 |
| C | 3.28913800  | -0.47304800 | -0.25075500 |
| C | 2.04131600  | 1.45575900  | -1.83193300 |
| H | 0.36103700  | 0.10982500  | -1.91170300 |
| C | 3.95305400  | 0.70379300  | -0.57438200 |
| H | 3.76539700  | -1.23182500 | 0.36523700  |
| C | 3.33974600  | 1.68476000  | -1.35773900 |
| H | 1.56011900  | 2.21081300  | -2.45200400 |
| H | 4.96580800  | 0.86620300  | -0.20950800 |
| C | 4.03999700  | 2.96631300  | -1.68114900 |
| H | 5.08841000  | 2.94825000  | -1.36634700 |
| H | 4.00960000  | 3.17742200  | -2.75703100 |
| H | 3.55435400  | 3.81380400  | -1.17925400 |
| H | -0.08649100 | -1.49484100 | 3.06741000  |
| H | 1.51844100  | -1.86781500 | 2.45363600  |
| H | -3.29871900 | 1.66223300  | 1.45022400  |
| H | 1.53568000  | 3.16806100  | 3.51420700  |
| H | 2.63443200  | 2.95376300  | 2.14009100  |
| H | 0.93550800  | 3.37059100  | 1.86181300  |

**SMD-M06/6-31G(d,p)/SDD**

Electronic Energy (0K) = -1336.824658

Electronic Energy (0K) + ZPE = -1336.513229

Enthalpy (333K) = -1336.485162

Free Energy (333K) = -1336.576895

**SMD-M06/6-311++G(d,p)/SDD**

Electronic Energy (0K) = -1337.083643

**AuPPh<sub>3</sub>NTf<sub>2</sub>**

Number of imaginary frequencies: 0

|    |             |             |             |
|----|-------------|-------------|-------------|
| C  | 2.76741200  | 2.20360800  | 0.80126800  |
| F  | 1.50297200  | 2.56160400  | 0.96243800  |
| F  | 3.10410500  | 1.35255300  | 1.75564900  |
| F  | 3.53410100  | 3.27690300  | 0.87593500  |
| S  | 3.03765300  | 1.44421900  | -0.87306700 |
| O  | 4.47735500  | 1.33221500  | -1.01013000 |
| O  | 2.26310100  | 2.27238700  | -1.78201000 |
| N  | 2.28264300  | -0.00961500 | -0.68074900 |
| O  | 4.19262600  | -1.44450800 | -1.69551900 |
| O  | 1.96871100  | -2.45246600 | -1.04889600 |
| S  | 3.02165200  | -1.47096600 | -0.84208300 |
| C  | 3.63653500  | -1.82075900 | 0.86496300  |
| F  | 4.59885500  | -0.97819600 | 1.19028200  |
| F  | 2.63874000  | -1.70977400 | 1.73045600  |
| F  | 4.10291900  | -3.05717400 | 0.89080400  |
| Au | 0.15181900  | -0.03871400 | -0.30917000 |
| P  | -2.12617700 | -0.06436900 | 0.03018200  |
| C  | -3.02374700 | -0.28845100 | -1.53660700 |
| C  | -2.48031300 | 0.26454300  | -2.70112200 |
| C  | -4.25094300 | -0.95522300 | -1.58877400 |
| C  | -3.16441800 | 0.15695600  | -3.90640700 |
| H  | -1.51928500 | 0.77850600  | -2.65989300 |
| C  | -4.92717200 | -1.06537700 | -2.79948100 |



|   |             |             |             |
|---|-------------|-------------|-------------|
| H | -4.68055400 | -1.38910700 | -0.68702300 |
| C | -4.38577900 | -0.50987100 | -3.95546500 |
| H | -2.73823500 | 0.58729300  | -4.80967100 |
| H | -5.87976400 | -1.58867100 | -2.83883200 |
| H | -4.91627800 | -0.60098100 | -4.90073300 |
| C | -2.65537800 | -1.40563300 | 1.14108100  |
| C | -3.74023000 | -1.25373900 | 2.00941700  |
| C | -1.97528300 | -2.62672900 | 1.08240800  |
| C | -4.13857300 | -2.31832800 | 2.81180800  |
| H | -4.27632500 | -0.30696600 | 2.05929400  |
| C | -2.38132900 | -3.68780600 | 1.88308100  |
| H | -1.12608900 | -2.74461500 | 0.40865700  |
| C | -3.46077600 | -3.53245900 | 2.74902500  |
| H | -4.98106600 | -2.19698700 | 3.48881700  |
| H | -1.84858500 | -4.63469000 | 1.83583700  |
| H | -3.77306900 | -4.36119300 | 3.38060200  |
| C | -2.73360800 | 1.48691700  | 0.76706000  |
| C | -3.81373000 | 2.18927000  | 0.22948300  |
| C | -2.09086500 | 1.96737700  | 1.91457600  |
| C | -4.24525900 | 3.36600700  | 0.83638000  |
| H | -4.32056200 | 1.82352500  | -0.66178000 |
| C | -2.53110000 | 3.13761400  | 2.51917400  |
| H | -1.24823900 | 1.41829500  | 2.33702700  |
| C | -3.60697200 | 3.83904700  | 1.97771900  |
| H | -5.08463900 | 3.91267400  | 0.41277000  |
| H | -2.03013400 | 3.50660200  | 3.41119300  |
| H | -3.94603700 | 4.75944700  | 2.44788500  |

**SMD-M06/6-31G(d,p)/SDD**

Electronic Energy (0K) = -2998.343001

Electronic Energy (0K) + ZPE = -2998.011873

Enthalpy (333K) = -2997.969974

Free Energy (333K) = -2998.097357

**SMD-M06/6-311++G(d,p)/SDD**

Electronic Energy (0K) = -2998.864499

**NTf<sub>2</sub><sup>-</sup>**

Number of imaginary frequencies: 0

|   |             |             |             |
|---|-------------|-------------|-------------|
| C | -2.11755700 | 0.72145200  | 0.21327700  |
| F | -2.41995400 | 0.74108000  | 1.50293800  |
| F | -1.33108400 | 1.75293500  | -0.06202400 |
| F | -3.23774300 | 0.83928900  | -0.49098000 |
| S | -1.29099700 | -0.85633700 | -0.24685200 |
| O | -1.00510900 | -0.71552500 | -1.67119200 |
| O | -2.23198900 | -1.88426700 | 0.18500800  |
| N | -0.03676900 | -0.78136700 | 0.75587100  |
| O | 1.79269700  | -1.64900300 | -0.86333900 |
| O | 2.30055100  | -1.03320100 | 1.52119000  |
| S | 1.50078700  | -0.84464400 | 0.31740600  |
| C | 1.89943000  | 0.88205700  | -0.19092800 |
| F | 1.20420100  | 1.23730700  | -1.26108000 |
| F | 1.63001500  | 1.72576300  | 0.79658900  |
| F | 3.19459900  | 0.96142300  | -0.47737400 |

**SMD-M06/6-31G(d,p)/SDD**

Electronic Energy (0K) = -1826.867423

Electronic Energy (0K) + ZPE = -1826.811210

Enthalpy (333K) = -1826.793766

Free Energy (333K) = -1826.858618

**SMD-M06/6-311++G(d,p)/SDD**

Electronic Energy (0K) = -1827.223710

**A'**

Number of imaginary frequencies: 0

|   |             |             |             |
|---|-------------|-------------|-------------|
| C | -2.47931800 | 4.86886400  | -1.07784500 |
| C | -2.04255900 | 3.59797400  | -0.72580600 |
| C | -2.95665200 | 2.63345500  | -0.27987500 |
| C | -4.31776000 | 2.96751500  | -0.19422400 |
| C | -4.74729000 | 4.23857100  | -0.54491400 |
| C | -3.83011500 | 5.19088000  | -0.98695100 |
| H | -1.76232700 | 5.60895900  | -1.42519300 |
| H | -5.03134100 | 2.22153800  | 0.15044000  |
| H | -5.80326600 | 4.48888600  | -0.47473200 |
| H | -4.17111900 | 6.18645200  | -1.26205700 |
| C | -2.51200700 | 1.29890400  | 0.08552800  |
| C | -2.99393800 | 0.19135100  | 0.46682000  |
| N | -3.34768400 | -0.99559300 | 0.83628800  |
| C | -3.32209200 | -1.42298600 | 2.26904300  |
| C | -2.05992000 | -1.09567600 | 2.90513200  |
| C | -1.03096000 | -0.77118000 | 3.45593000  |
| C | 0.18970000  | -0.38219100 | 4.13608400  |
| S | -3.63701200 | -2.21069100 | -0.43150800 |
| O | -4.50105100 | -3.18499300 | 0.20895300  |
| O | -4.05741900 | -1.42985300 | -1.57770200 |
| C | -2.04274600 | -2.90090300 | -0.71545600 |
| C | -1.65387700 | -4.02597200 | 0.01090200  |
| C | -1.21228100 | -2.32114600 | -1.67728000 |
| C | -0.41019800 | -4.58432900 | -0.24686300 |
| H | -2.32349300 | -4.47552700 | 0.74012800  |
| C | 0.02697900  | -2.89939100 | -1.91486400 |
| H | -1.54191400 | -1.45894300 | -2.25380600 |

|    |             |             |             |
|----|-------------|-------------|-------------|
| C  | 0.44406600  | -4.03605300 | -1.21089600 |
| H  | -0.10020500 | -5.47377800 | 0.29881800  |
| H  | 0.68137000  | -2.46838500 | -2.67223900 |
| C  | 1.78884400  | -4.63460200 | -1.46826700 |
| H  | 1.81954500  | -5.69439800 | -1.19431800 |
| H  | 2.56062700  | -4.12358200 | -0.87518800 |
| H  | 2.07778400  | -4.53955400 | -2.52091000 |
| H  | -3.52935600 | -2.49894700 | 2.28570900  |
| H  | -4.16318400 | -0.92908300 | 2.76961000  |
| Au | -0.40734600 | 0.74311300  | 0.11020300  |
| P  | 1.91939100  | 0.48949300  | -0.02628100 |
| H  | 0.96754800  | -1.15009600 | 4.04330600  |
| H  | 0.58576900  | 0.55503500  | 3.72482300  |
| H  | 0.00286500  | -0.21903800 | 5.20430600  |
| H  | -0.98630400 | 3.33799500  | -0.79814300 |
| C  | 2.43372200  | -0.11512900 | -1.66556500 |
| C  | 3.52812800  | -0.96827800 | -1.83162300 |
| C  | 1.71623200  | 0.32348200  | -2.78428700 |
| C  | 3.89715600  | -1.38091600 | -3.10916600 |
| H  | 4.09473200  | -1.31074800 | -0.96635600 |
| C  | 2.09305100  | -0.08657400 | -4.05804700 |
| H  | 0.85770500  | 0.98441700  | -2.65226100 |
| C  | 3.18073200  | -0.94287200 | -4.21938100 |
| H  | 4.74681200  | -2.04811400 | -3.23515200 |
| H  | 1.53287400  | 0.25571200  | -4.92512400 |
| H  | 3.47025900  | -1.26983800 | -5.21558200 |
| C  | 2.61950300  | -0.66472000 | 1.19658700  |
| C  | 3.73550800  | -0.34394200 | 1.97228900  |
| C  | 2.00634800  | -1.91528900 | 1.34213200  |
| C  | 4.23406400  | -1.27038300 | 2.88499200  |

|   |            |             |             |
|---|------------|-------------|-------------|
| H | 4.21948900 | 0.62553800  | 1.86808800  |
| C | 2.51628400 | -2.84030000 | 2.24549400  |
| H | 1.12960000 | -2.16620100 | 0.74072200  |
| C | 3.62936200 | -2.51593100 | 3.02008400  |
| H | 5.10165300 | -1.01589100 | 3.48938300  |
| H | 2.04077800 | -3.81330500 | 2.35263400  |
| H | 4.02365600 | -3.23702200 | 3.73253000  |
| C | 2.75746400 | 2.08787500  | 0.21694000  |
| C | 3.97777800 | 2.37097200  | -0.40418100 |
| C | 2.17929200 | 3.02940000  | 1.07584700  |
| C | 4.61204900 | 3.58542600  | -0.16469900 |
| H | 4.43473300 | 1.64372900  | -1.07391900 |
| C | 2.82090100 | 4.23981200  | 1.31502800  |
| H | 1.22261200 | 2.81357000  | 1.55372000  |
| C | 4.03535200 | 4.51768400  | 0.69356100  |
| H | 5.55951800 | 3.80380700  | -0.65195500 |
| H | 2.36769500 | 4.96962800  | 1.98189800  |
| H | 4.53326900 | 5.46740400  | 0.87587400  |

**SMD-M06/6-31G(d,p)/SDD**

Electronic Energy (0K) = -2508.293342

Electronic Energy (0K) + ZPE = -2507.706661

Enthalpy (333K) = -2507.654878

Free Energy (333K) = -2507.800188

**SMD-M06/6-311++G(d,p)/SDD**

Electronic Energy (0K) = -2508.722291

**2a (Au catalysis system)**

Number of imaginary frequencies: 0

|   |            |             |            |
|---|------------|-------------|------------|
| C | 1.17618600 | -0.33546200 | 0.00004100 |
| C | 0.00016900 | -1.07464900 | 0.00010300 |

|    |             |             |             |
|----|-------------|-------------|-------------|
| C  | -1.17568300 | -0.33640500 | 0.00002900  |
| C  | -1.18012300 | 1.04429500  | 0.00001200  |
| C  | 1.18012000  | 1.04473500  | 0.00004800  |
| H  | 0.00095500  | -2.15989400 | 0.00008800  |
| H  | 2.07263500  | 1.65948500  | -0.00002400 |
| N  | -0.00056400 | 1.73543900  | 0.00021000  |
| O  | -0.00055100 | 2.99983100  | -0.00014700 |
| H  | -2.07279900 | 1.65883500  | -0.00014900 |
| Cl | -2.70968300 | -1.15784400 | -0.00004100 |
| Cl | 2.70989200  | -1.15746400 | -0.00005400 |

**SMD-M06/6-31G(d,p)/SDD**

Electronic Energy (0K) = -1242.374667

Electronic Energy (0K) + ZPE = -1242.301227

Enthalpy (333K) = -1242.291097

Free Energy (333K) = -1242.338619

**SMD-M06/6-311++G(d,p)/SDD**

Electronic Energy (0K) = -1242.516989

**TS<sub>A</sub>'**

Number of imaginary frequencies: 1

|   |            |            |             |
|---|------------|------------|-------------|
| C | 1.01628300 | 4.80024800 | 0.96170400  |
| C | 0.84423300 | 3.43484200 | 0.76728000  |
| C | 1.36879800 | 2.80083000 | -0.36946400 |
| C | 2.03346500 | 3.57951200 | -1.32854300 |
| C | 2.17699400 | 4.94956100 | -1.14249800 |
| C | 1.67932600 | 5.56309500 | 0.00434800  |
| H | 0.61811900 | 5.27108500 | 1.85791900  |
| H | 2.43111400 | 3.10476500 | -2.22082900 |
| H | 2.68642100 | 5.54180300 | -1.89981700 |
| H | 1.80133800 | 6.63446900 | 0.14783300  |

|    |             |             |             |
|----|-------------|-------------|-------------|
| C  | 1.16530900  | 1.35914100  | -0.54510400 |
| C  | 1.96451800  | 0.41502900  | -0.94321000 |
| N  | 2.13978800  | -0.86258600 | -1.23486500 |
| C  | 1.95414800  | -1.35306000 | -2.62489300 |
| C  | 0.61152800  | -1.10093000 | -3.12101600 |
| C  | -0.48513800 | -0.83533100 | -3.56193100 |
| C  | -1.79089800 | -0.51316900 | -4.10651200 |
| S  | 2.56807900  | -1.98982500 | 0.01964800  |
| O  | 3.41114000  | -2.97887000 | -0.63451900 |
| O  | 3.06753000  | -1.16299500 | 1.10586300  |
| C  | 1.05257300  | -2.75201100 | 0.50551300  |
| C  | 0.64240200  | -3.92012400 | -0.13578700 |
| C  | 0.32048700  | -2.19736900 | 1.55636100  |
| C  | -0.52021600 | -4.54324500 | 0.29539900  |
| H  | 1.23775900  | -4.35249300 | -0.93633800 |
| C  | -0.83705200 | -2.84203900 | 1.97182600  |
| H  | 0.66909700  | -1.30055800 | 2.06436900  |
| C  | -1.27254600 | -4.01987100 | 1.35352100  |
| H  | -0.84420200 | -5.46433400 | -0.18641100 |
| H  | -1.40959300 | -2.43055000 | 2.80252200  |
| C  | -2.53379200 | -4.69043400 | 1.79313700  |
| H  | -2.50788800 | -5.76778200 | 1.59734800  |
| H  | -3.39783400 | -4.28477300 | 1.24749300  |
| H  | -2.72393300 | -4.53586300 | 2.86092100  |
| H  | 2.20417100  | -2.42014200 | -2.63557000 |
| H  | 2.70229900  | -0.84770900 | -3.25038600 |
| Au | -0.81286000 | 0.65243200  | -0.18997000 |
| P  | -3.10776100 | 0.29038900  | 0.18846300  |
| H  | -2.50975500 | -1.32564500 | -3.94357600 |
| H  | -2.19517100 | 0.39541500  | -3.64182800 |

|   |             |             |             |
|---|-------------|-------------|-------------|
| H | -1.72903900 | -0.33020200 | -5.18607800 |
| H | 0.30858300  | 2.83996600  | 1.50688600  |
| C | -3.50089700 | -0.27686800 | 1.87693100  |
| C | -4.52869300 | -1.18603200 | 2.14053800  |
| C | -2.75313200 | 0.25169300  | 2.93568000  |
| C | -4.80148100 | -1.56413300 | 3.45279900  |
| H | -5.11989300 | -1.59928100 | 1.32408000  |
| C | -3.03348800 | -0.12423600 | 4.24423700  |
| H | -1.94721400 | 0.95827800  | 2.73107800  |
| C | -4.05491800 | -1.03658100 | 4.50220900  |
| H | -5.60063000 | -2.27428800 | 3.65331400  |
| H | -2.44974500 | 0.28954600  | 5.06334800  |
| H | -4.26907000 | -1.33641000 | 5.52560000  |
| C | -3.87346700 | -0.91530800 | -0.94493800 |
| C | -5.06589600 | -0.65994700 | -1.62548700 |
| C | -3.21979900 | -2.14032500 | -1.12557100 |
| C | -5.59959900 | -1.62526900 | -2.47600300 |
| H | -5.58114900 | 0.29028300  | -1.49614900 |
| C | -3.76344000 | -3.10538000 | -1.96524400 |
| H | -2.28209100 | -2.33824800 | -0.60208200 |
| C | -4.95345300 | -2.84602400 | -2.64377800 |
| H | -6.52644200 | -1.42050700 | -3.00707500 |
| H | -3.25424600 | -4.05816200 | -2.09737500 |
| H | -5.37511000 | -3.59730400 | -3.30781600 |
| C | -4.00915800 | 1.86127000  | -0.02755700 |
| C | -5.23574400 | 2.09535100  | 0.60256000  |
| C | -3.46388100 | 2.83982800  | -0.86633700 |
| C | -5.90931300 | 3.29323400  | 0.38948600  |
| H | -5.66754300 | 1.34167300  | 1.26005100  |
| C | -4.14360800 | 4.03464700  | -1.07899400 |



|    |             |             |             |
|----|-------------|-------------|-------------|
| H  | -2.49842800 | 2.66637100  | -1.34514700 |
| C  | -5.36479100 | 4.26113900  | -0.45082800 |
| H  | -6.86170100 | 3.47157800  | 0.88358700  |
| H  | -3.71328100 | 4.79265300  | -1.72948100 |
| H  | -5.89266900 | 5.19844900  | -0.61212600 |
| C  | 6.36499900  | -0.78856600 | -0.19873000 |
| C  | 6.60604200  | -0.18666300 | 1.02778600  |
| C  | 5.81992500  | 0.91051300  | 1.36106000  |
| C  | 4.83433200  | 1.37341300  | 0.51164000  |
| C  | 5.37847900  | -0.31754300 | -1.04855700 |
| H  | 7.37855600  | -0.55414200 | 1.69680700  |
| H  | 5.15522300  | -0.73364600 | -2.02486100 |
| N  | 4.63384500  | 0.74580100  | -0.67127900 |
| O  | 3.69541400  | 1.17987900  | -1.47086200 |
| H  | 4.18601400  | 2.21942700  | 0.71531200  |
| Cl | 6.06695300  | 1.72944000  | 2.86715700  |
| Cl | 7.29753300  | -2.15816900 | -0.69940600 |

**SMD-M06/6-31G(d,p)/SDD**

Electronic Energy (0K) = -3750.668668

Electronic Energy (0K) + ZPE = -3750.007223

Enthalpy (333K) = -3749.945576

Free Energy (333K) = -3750.112501

**SMD-M06/6-311++G(d,p)/SDD**

Electronic Energy (0K) = -3751.234608

**B'**

Number of imaginary frequencies: 0

|   |            |            |             |
|---|------------|------------|-------------|
| C | 1.22343700 | 4.72058800 | 1.08632500  |
| C | 1.04548700 | 3.35850200 | 0.87316600  |
| C | 1.41126700 | 2.76545900 | -0.34590500 |

|   |             |             |             |
|---|-------------|-------------|-------------|
| C | 1.92323800  | 3.59023000  | -1.35834700 |
| C | 2.07193900  | 4.95808000  | -1.15238800 |
| C | 1.73295100  | 5.52751600  | 0.07170400  |
| H | 0.94852900  | 5.15605700  | 2.04492400  |
| H | 2.19328600  | 3.15406700  | -2.31816100 |
| H | 2.46076600  | 5.58196900  | -1.95485100 |
| H | 1.85681900  | 6.59630500  | 0.23209400  |
| C | 1.20801400  | 1.31423400  | -0.53286400 |
| C | 2.18621400  | 0.50563700  | -0.95400300 |
| N | 2.16265700  | -0.86989600 | -1.17980700 |
| C | 1.96505300  | -1.37654000 | -2.55144200 |
| C | 0.63056400  | -1.11129600 | -3.07388800 |
| C | -0.45513300 | -0.85215100 | -3.54506500 |
| C | -1.75237000 | -0.53436900 | -4.11338900 |
| S | 2.48955400  | -1.96570900 | 0.06549900  |
| O | 3.33745300  | -3.00140200 | -0.51759400 |
| O | 2.97549700  | -1.15587100 | 1.17766300  |
| C | 0.96522300  | -2.72785300 | 0.54632000  |
| C | 0.56087800  | -3.90336200 | -0.08325500 |
| C | 0.22738200  | -2.17417400 | 1.59218300  |
| C | -0.60120900 | -4.52952600 | 0.34786900  |
| H | 1.16245000  | -4.34044900 | -0.87663600 |
| C | -0.92918000 | -2.81975600 | 2.01045200  |
| H | 0.56991700  | -1.27110700 | 2.09314700  |
| C | -1.35994500 | -4.00232200 | 1.39866500  |
| H | -0.91967700 | -5.45530800 | -0.12910700 |
| H | -1.50572500 | -2.40384800 | 2.83645400  |
| C | -2.62351000 | -4.67196500 | 1.83504000  |
| H | -2.59161300 | -5.75211100 | 1.65510700  |
| H | -3.48378600 | -4.27807800 | 1.27496100  |

|    |             |             |             |
|----|-------------|-------------|-------------|
| H  | -2.82544600 | -4.50400100 | 2.89873700  |
| H  | 2.18937300  | -2.45004800 | -2.55356300 |
| H  | 2.72134000  | -0.91130500 | -3.20120600 |
| Au | -0.74794100 | 0.64687100  | -0.20044700 |
| P  | -3.06557000 | 0.30370400  | 0.15754300  |
| H  | -2.47157900 | -1.34883300 | -3.96137400 |
| H  | -2.16859000 | 0.37269600  | -3.65610500 |
| H  | -1.67520500 | -0.35249300 | -5.19225500 |
| H  | 0.62142800  | 2.73284900  | 1.65920500  |
| C  | -3.48843400 | -0.22414000 | 1.85371700  |
| C  | -4.51897400 | -1.12662600 | 2.12809700  |
| C  | -2.75632800 | 0.33349500  | 2.90875800  |
| C  | -4.81051200 | -1.46905100 | 3.44634700  |
| H  | -5.09886200 | -1.56181000 | 1.31486300  |
| C  | -3.05480000 | -0.00683400 | 4.22308100  |
| H  | -1.94820000 | 1.03560900  | 2.69574700  |
| C  | -4.07954400 | -0.91243500 | 4.49168900  |
| H  | -5.61243100 | -2.17391500 | 3.65482900  |
| H  | -2.48319700 | 0.43019500  | 5.03877000  |
| H  | -4.30856100 | -1.18394400 | 5.51981800  |
| C  | -3.85147200 | -0.90921800 | -0.95700800 |
| C  | -5.04350500 | -0.65323800 | -1.63839500 |
| C  | -3.20962400 | -2.14227500 | -1.12448700 |
| C  | -5.58821000 | -1.62442600 | -2.47510700 |
| H  | -5.55009500 | 0.30318700  | -1.52074100 |
| C  | -3.76391800 | -3.11347900 | -1.95035300 |
| H  | -2.27266300 | -2.34112500 | -0.60050900 |
| C  | -4.95341600 | -2.85299900 | -2.62904500 |
| H  | -6.51468100 | -1.41816700 | -3.00640900 |
| H  | -3.26316800 | -4.07219600 | -2.07167700 |

|    |             |             |             |
|----|-------------|-------------|-------------|
| H  | -5.38354400 | -3.60915900 | -3.28211700 |
| C  | -3.96046100 | 1.87703300  | -0.08684700 |
| C  | -5.18959500 | 2.12788000  | 0.53194100  |
| C  | -3.40628300 | 2.84052100  | -0.93695500 |
| C  | -5.85681400 | 3.32514200  | 0.29630000  |
| H  | -5.62879300 | 1.38692000  | 1.19898100  |
| C  | -4.07939100 | 4.03508700  | -1.17272200 |
| H  | -2.43783600 | 2.65617300  | -1.40515600 |
| C  | -5.30333700 | 4.27726000  | -0.55615400 |
| H  | -6.81125400 | 3.51544400  | 0.78208700  |
| H  | -3.64137500 | 4.78093400  | -1.83220100 |
| H  | -5.82616500 | 5.21416400  | -0.73568900 |
| C  | 6.33038800  | -0.77180800 | -0.30505900 |
| C  | 6.58282000  | -0.19946600 | 0.93569100  |
| C  | 5.75160500  | 0.82638100  | 1.37450300  |
| C  | 4.69284300  | 1.25575600  | 0.59544300  |
| C  | 5.27122000  | -0.32952300 | -1.08107100 |
| H  | 7.41063200  | -0.54457000 | 1.54913300  |
| H  | 5.01543400  | -0.71693200 | -2.06220000 |
| N  | 4.50359300  | 0.65505800  | -0.59029200 |
| O  | 3.46164700  | 1.08918800  | -1.36627800 |
| H  | 3.99347500  | 2.04063300  | 0.86817100  |
| Cl | 6.02299200  | 1.57883800  | 2.90228400  |
| Cl | 7.31754700  | -2.05096200 | -0.90427300 |

**SMD-M06/6-31G(d,p)/SDD**

Electronic Energy (0K) = -3750.682798

Electronic Energy (0K) + ZPE = -3750.019567

Enthalpy (333K) = -3749.957957

Free Energy (333K) = -3750.125773

**SMD-M06/6-311++G(d,p)/SDD**

Electronic Energy (0K) = -3751.246795

**A1'**

Number of imaginary frequencies: 0

|   |             |             |             |
|---|-------------|-------------|-------------|
| C | -6.55668900 | -4.43320000 | 0.48196700  |
| C | -5.47161700 | -3.68723700 | 0.04144400  |
| C | -5.49564900 | -2.28698100 | 0.13316200  |
| C | -6.62232500 | -1.65435300 | 0.68207800  |
| C | -7.69524500 | -2.41059500 | 1.13408300  |
| C | -7.66838500 | -3.79950000 | 1.03193200  |
| H | -6.53180400 | -5.51771600 | 0.40076500  |
| H | -6.64190300 | -0.56836600 | 0.74990000  |
| H | -8.56187400 | -1.91182400 | 1.56251600  |
| H | -8.51417900 | -4.38800500 | 1.38046600  |
| C | -4.39297700 | -1.50962800 | -0.32689200 |
| C | -3.47067500 | -0.82918000 | -0.72856400 |
| N | -2.47140600 | -0.04840600 | -1.17889900 |
| C | -1.55196500 | -0.56964800 | -2.19686600 |
| C | -0.69176500 | -1.65401700 | -1.69292000 |
| C | -0.20186000 | -2.72103400 | -1.31895300 |
| C | 0.25275100  | -4.05308100 | -0.95316100 |
| S | -1.93439000 | 1.20470800  | -0.11749200 |
| O | -1.70475200 | 0.64616500  | 1.20860600  |
| O | -0.84362000 | 1.84475400  | -0.84326300 |
| C | -3.35226800 | 2.25284600  | -0.06211600 |
| C | -4.15823300 | 2.24830700  | 1.07097300  |
| C | -3.64276000 | 3.05031700  | -1.16967500 |
| C | -5.27855300 | 3.07068800  | 1.09312000  |
| H | -3.91109600 | 1.61408800  | 1.91861300  |
| C | -4.76305600 | 3.86218500  | -1.12439500 |

|    |             |             |             |
|----|-------------|-------------|-------------|
| H  | -3.00019700 | 3.03544200  | -2.04755800 |
| C  | -5.59613500 | 3.88474100  | 0.00348100  |
| H  | -5.91849200 | 3.08035100  | 1.97365500  |
| H  | -5.00500500 | 4.49484100  | -1.97704700 |
| C  | -6.79879300 | 4.77297200  | 0.02328800  |
| H  | -7.37227700 | 4.66293400  | 0.94907000  |
| H  | -7.46609000 | 4.55150300  | -0.81908300 |
| H  | -6.50983200 | 5.82736700  | -0.07257000 |
| H  | -0.96427800 | 0.26515700  | -2.58957100 |
| H  | -2.16443000 | -0.95902500 | -3.01899900 |
| Au | 1.27361300  | -1.03483100 | -0.66615800 |
| P  | 3.10492700  | 0.10459300  | 0.22341400  |
| H  | -4.59776900 | -4.17890600 | -0.38116900 |
| H  | 0.35292500  | -4.14750700 | 0.13373300  |
| H  | -0.47424900 | -4.79636600 | -1.30040400 |
| H  | 1.22247300  | -4.27741400 | -1.41164900 |
| C  | 2.87545700  | 0.47018900  | 1.98975000  |
| C  | 1.61102100  | 0.90112600  | 2.40634000  |
| C  | 3.91603900  | 0.35694300  | 2.91483500  |
| C  | 1.39158200  | 1.21877200  | 3.74073400  |
| H  | 0.79715300  | 0.98659600  | 1.68519700  |
| C  | 3.68686700  | 0.67193300  | 4.25123300  |
| H  | 4.90304300  | 0.02408400  | 2.59713800  |
| C  | 2.42861700  | 1.10071300  | 4.66344900  |
| H  | 0.40583500  | 1.55003400  | 4.05997600  |
| H  | 4.49598000  | 0.58004000  | 4.97221700  |
| H  | 2.25402800  | 1.34116900  | 5.70983900  |
| C  | 4.62534300  | -0.88147100 | 0.06982700  |
| C  | 5.86995000  | -0.28242800 | -0.14151900 |
| C  | 4.53360400  | -2.27105500 | 0.20879000  |

|   |            |             |             |
|---|------------|-------------|-------------|
| C | 7.01368600 | -1.07171000 | -0.21242100 |
| H | 5.94836100 | 0.79864000  | -0.24821300 |
| C | 5.68065300 | -3.05286800 | 0.14285100  |
| H | 3.56062500 | -2.73952000 | 0.36910500  |
| C | 6.91951700 | -2.45304400 | -0.07028700 |
| H | 7.98128600 | -0.60405100 | -0.37912300 |
| H | 5.60697500 | -4.13246400 | 0.25123200  |
| H | 7.81591000 | -3.06634700 | -0.12824300 |
| C | 3.39342700 | 1.69113300  | -0.61593600 |
| C | 3.84259400 | 2.81476700  | 0.08259000  |
| C | 3.18218500 | 1.76496900  | -1.99716400 |
| C | 4.08028200 | 4.00335900  | -0.60059000 |
| H | 4.00783300 | 2.76370600  | 1.15789100  |
| C | 3.42634800 | 2.95372700  | -2.67396000 |
| H | 2.82517500 | 0.88892000  | -2.54007100 |
| C | 3.87261600 | 4.07282200  | -1.97491100 |
| H | 4.42676600 | 4.87803700  | -0.05506800 |
| H | 3.25975700 | 3.00934700  | -3.74721800 |
| H | 4.05553400 | 5.00528500  | -2.50420800 |

**SMD-M06/6-31G(d,p)/SDD**

Electronic Energy (0K) = -2508.276594

Electronic Energy (0K) + ZPE = -2507.690933

Enthalpy (333K) = -2507.638222

Free Energy (333K) = -2507.791743

**SMD-M06/6-311++G(d,p)/SDD**

Electronic Energy (0K) = -2508.706992

**TS<sub>A1'</sub>**

Number of imaginary frequencies: 1

|   |             |             |            |
|---|-------------|-------------|------------|
| C | -1.74365500 | -0.13157800 | 4.83484300 |
|---|-------------|-------------|------------|

|   |             |             |             |
|---|-------------|-------------|-------------|
| C | -1.57404300 | 0.11222400  | 3.47880700  |
| C | -1.49045000 | 1.43113900  | 3.00273800  |
| C | -1.57148600 | 2.49548000  | 3.91350400  |
| C | -1.72428200 | 2.24091700  | 5.27035400  |
| C | -1.81471300 | 0.93052700  | 5.73381700  |
| H | -1.81133000 | -1.15604000 | 5.19443000  |
| H | -1.50684900 | 3.51720500  | 3.54472200  |
| H | -1.77938100 | 3.07161500  | 5.97057000  |
| H | -1.93985200 | 0.73645200  | 6.79680300  |
| C | -1.29871100 | 1.67122000  | 1.61087100  |
| C | -1.10303500 | 1.82905600  | 0.42137900  |
| N | -0.88478200 | 1.97844700  | -0.89442300 |
| C | -1.49303900 | 1.01811400  | -1.82482100 |
| C | -1.08024500 | -0.39412200 | -1.57599100 |
| C | -1.70875700 | -1.49869000 | -1.67104700 |
| C | -1.86161200 | -2.94494100 | -1.68088300 |
| S | 0.49513800  | 2.90168300  | -1.35584400 |
| O | 1.54364300  | 2.67742200  | -0.37128300 |
| O | 0.70645500  | 2.58618900  | -2.76221600 |
| C | -0.09298100 | 4.56019200  | -1.19036300 |
| C | 0.21047200  | 5.28242700  | -0.04130200 |
| C | -0.89132900 | 5.09359900  | -2.20232800 |
| C | -0.29153300 | 6.57232600  | 0.08654300  |
| H | 0.83330700  | 4.84519300  | 0.73526400  |
| C | -1.37978800 | 6.38102800  | -2.05385800 |
| H | -1.12004200 | 4.51191000  | -3.09293200 |
| C | -1.08841600 | 7.13852500  | -0.91108100 |
| H | -0.05850200 | 7.15167300  | 0.97818700  |
| H | -1.99988300 | 6.81545400  | -2.83664700 |
| C | -1.61553300 | 8.53221900  | -0.78228400 |



|    |             |             |             |
|----|-------------|-------------|-------------|
| H  | -1.46707400 | 8.93190300  | 0.22597700  |
| H  | -2.68649300 | 8.57607100  | -1.01424300 |
| H  | -1.11155600 | 9.20730200  | -1.48639700 |
| H  | -1.20807300 | 1.31463400  | -2.83981900 |
| H  | -2.58298300 | 1.10743800  | -1.74263400 |
| Au | 0.87292000  | -0.85484100 | -0.83226100 |
| P  | 3.00960100  | -1.31114300 | 0.02991200  |
| H  | -1.50140800 | -0.71246300 | 2.77009100  |
| H  | -0.88877400 | -3.40166600 | -1.46125800 |
| H  | -2.57132900 | -3.29482700 | -0.92134500 |
| H  | -2.18405400 | -3.30040700 | -2.66598600 |
| C  | 3.13717600  | -0.96253900 | 1.81515600  |
| C  | 2.54232900  | 0.20795500  | 2.29993300  |
| C  | 3.82002300  | -1.81025200 | 2.69163900  |
| C  | 2.62970600  | 0.52398000  | 3.65086200  |
| H  | 2.01685500  | 0.87551300  | 1.61502900  |
| C  | 3.90104600  | -1.48915200 | 4.04357100  |
| H  | 4.29040100  | -2.72036000 | 2.32195500  |
| C  | 3.30496500  | -0.32655600 | 4.52296100  |
| H  | 2.15873900  | 1.43102300  | 4.02438000  |
| H  | 4.43133100  | -2.15200500 | 4.72365800  |
| H  | 3.36522100  | -0.08249800 | 5.58132700  |
| C  | 3.42620700  | -3.07599700 | -0.16848200 |
| C  | 4.65309900  | -3.50524800 | -0.67743300 |
| C  | 2.46597800  | -4.01983800 | 0.21768400  |
| C  | 4.91542900  | -4.86790500 | -0.79839000 |
| H  | 5.40709800  | -2.78116800 | -0.98108500 |
| C  | 2.73665400  | -5.37729100 | 0.10346700  |
| H  | 1.50773900  | -3.68537000 | 0.61855800  |
| C  | 3.96176600  | -5.80169000 | -0.40829300 |

|    |             |             |             |
|----|-------------|-------------|-------------|
| H  | 5.87169600  | -5.19771200 | -1.19799100 |
| H  | 1.98970600  | -6.10597800 | 0.41019400  |
| H  | 4.17109100  | -6.86480600 | -0.50413300 |
| C  | 4.33052700  | -0.35970900 | -0.78139700 |
| C  | 5.52866100  | -0.06816400 | -0.12174000 |
| C  | 4.14604100  | 0.05239800  | -2.10488800 |
| C  | 6.53379600  | 0.62561300  | -0.78650300 |
| H  | 5.67786600  | -0.38362400 | 0.91026000  |
| C  | 5.15603200  | 0.74298700  | -2.76557300 |
| H  | 3.20496700  | -0.16260100 | -2.61306000 |
| C  | 6.34809300  | 1.02967200  | -2.10608500 |
| H  | 7.46385900  | 0.85352300  | -0.27076300 |
| H  | 5.00750100  | 1.06549400  | -3.79352600 |
| H  | 7.13522000  | 1.57588400  | -2.62122600 |
| C  | -6.41554400 | -2.85595600 | -1.11465300 |
| C  | -6.51154500 | -2.43364400 | 0.20510800  |
| C  | -5.56480200 | -1.51628300 | 0.64188000  |
| C  | -4.57639400 | -1.04157200 | -0.20143300 |
| C  | -5.41869700 | -2.38722800 | -1.95084200 |
| H  | -7.29149200 | -2.80117800 | 0.86551100  |
| H  | -5.29251600 | -2.67958500 | -2.98750000 |
| N  | -4.52310600 | -1.48605700 | -1.48050300 |
| O  | -3.60503000 | -1.03794100 | -2.28742400 |
| H  | -3.81673700 | -0.32118300 | 0.08438200  |
| Cl | -5.60688000 | -0.93399100 | 2.27234000  |
| Cl | -7.55023400 | -4.00034300 | -1.74928500 |

**SMD-M06/6-31G(d,p)/SDD**

Electronic Energy (0K) = -3750.652242

Electronic Energy (0K) + ZPE = -3749.991703

Enthalpy (333K) = -3749.929310

Free Energy (333K) = -3750.103823

**SMD-M06/6-311++G(d,p)/SDD**

Electronic Energy (0K) = -3751.219227

**B1'**

Number of imaginary frequencies: 0

|   |             |             |             |
|---|-------------|-------------|-------------|
| C | -1.72396100 | -0.51079000 | 4.97419500  |
| C | -1.58016500 | -0.23161200 | 3.62173000  |
| C | -1.60926400 | 1.09748600  | 3.16683900  |
| C | -1.77497400 | 2.13544800  | 4.09659500  |
| C | -1.90085000 | 1.84643000  | 5.44926700  |
| C | -1.88027200 | 0.52585100  | 5.89193600  |
| H | -1.70404800 | -1.54345100 | 5.31591500  |
| H | -1.79779900 | 3.16521800  | 3.74557600  |
| H | -2.02204200 | 2.65845200  | 6.16306200  |
| H | -1.98478700 | 0.30450500  | 6.95180100  |
| C | -1.44967500 | 1.37628400  | 1.77861400  |
| C | -1.27070400 | 1.56812400  | 0.59076100  |
| N | -1.08367700 | 1.73880300  | -0.72378900 |
| C | -1.59115900 | 0.72014600  | -1.66548500 |
| C | -0.98178600 | -0.63071600 | -1.41256900 |
| C | -1.70106700 | -1.74060000 | -1.59960900 |
| C | -1.33719700 | -3.17633600 | -1.46904800 |
| S | -0.08030200 | 3.02751400  | -1.23208800 |
| O | 0.95941500  | 3.18892200  | -0.22801300 |
| O | 0.24476400  | 2.73884900  | -2.62186600 |
| C | -1.15208400 | 4.43414700  | -1.15939100 |
| C | -1.18798400 | 5.20298700  | -0.00008900 |
| C | -1.97602200 | 4.71665400  | -2.24834700 |
| C | -2.06300000 | 6.28085500  | 0.05991300  |

|    |             |             |             |
|----|-------------|-------------|-------------|
| H  | -0.53441400 | 4.96823200  | 0.83661900  |
| C  | -2.83943200 | 5.79782800  | -2.16744300 |
| H  | -1.93117300 | 4.10690800  | -3.14813500 |
| C  | -2.89640200 | 6.59477200  | -1.01668300 |
| H  | -2.09672300 | 6.89401600  | 0.95889400  |
| H  | -3.48262800 | 6.03716800  | -3.01311600 |
| C  | -3.82238200 | 7.76846500  | -0.96234600 |
| H  | -3.90921700 | 8.17226200  | 0.05159600  |
| H  | -4.82676300 | 7.50128000  | -1.31226300 |
| H  | -3.46559300 | 8.57800400  | -1.61275900 |
| H  | -1.33165000 | 1.06569200  | -2.67311100 |
| H  | -2.68761700 | 0.72318200  | -1.59204800 |
| Au | 1.00867000  | -0.73110000 | -0.77414700 |
| P  | 3.26058700  | -0.82296300 | -0.03455500 |
| H  | -1.44253400 | -1.03617300 | 2.89928200  |
| H  | -0.28049100 | -3.26119500 | -1.19834400 |
| H  | -1.91875400 | -3.69166700 | -0.69111500 |
| H  | -1.49469300 | -3.71410800 | -2.41383600 |
| C  | 3.42454900  | -0.73080000 | 1.78142800  |
| C  | 2.54693300  | 0.10985200  | 2.47535000  |
| C  | 4.39851300  | -1.44552800 | 2.48436800  |
| C  | 2.64488000  | 0.23615800  | 3.85638500  |
| H  | 1.78776200  | 0.66949800  | 1.92802000  |
| C  | 4.48950600  | -1.31929500 | 3.86742700  |
| H  | 5.08875400  | -2.10026900 | 1.95382000  |
| C  | 3.61422600  | -0.48124500 | 4.55261500  |
| H  | 1.95809300  | 0.89048100  | 4.38967100  |
| H  | 5.24831900  | -1.87833400 | 4.41059400  |
| H  | 3.68667100  | -0.38821700 | 5.63406100  |
| C  | 4.10310000  | -2.36880400 | -0.52224700 |

|   |             |             |             |
|---|-------------|-------------|-------------|
| C | 5.35491600  | -2.38245700 | -1.14036300 |
| C | 3.45048800  | -3.57907000 | -0.25562900 |
| C | 5.94577500  | -3.59492200 | -1.48845200 |
| H | 5.87380400  | -1.44893000 | -1.35169400 |
| C | 4.04789700  | -4.78589900 | -0.59647200 |
| H | 2.47509300  | -3.57342900 | 0.23287700  |
| C | 5.29568700  | -4.79396400 | -1.21714000 |
| H | 6.92016300  | -3.59888700 | -1.97188300 |
| H | 3.53727700  | -5.72217700 | -0.38209000 |
| H | 5.76068300  | -5.73868200 | -1.49026900 |
| C | 4.27213900  | 0.53685100  | -0.70580100 |
| C | 5.35597900  | 1.07540500  | -0.00659100 |
| C | 3.95609800  | 1.02439800  | -1.97840000 |
| C | 6.11465800  | 2.09150700  | -0.57864700 |
| H | 5.60884000  | 0.70154900  | 0.98490200  |
| C | 4.72003500  | 2.03677300  | -2.54767200 |
| H | 3.10432600  | 0.61037000  | -2.51946800 |
| C | 5.79755200  | 2.57139700  | -1.84669100 |
| H | 6.95525100  | 2.51107500  | -0.03047100 |
| H | 4.46680700  | 2.41503300  | -3.53547400 |
| H | 6.39041700  | 3.36927600  | -2.28862000 |
| C | -5.80317900 | -3.64885900 | -1.22708000 |
| C | -6.01494100 | -3.28167100 | 0.09694200  |
| C | -5.17550200 | -2.32567400 | 0.65935500  |
| C | -4.16053400 | -1.75283000 | -0.08708600 |
| C | -4.77665000 | -3.07823500 | -1.96213800 |
| H | -6.81526700 | -3.73302100 | 0.67766700  |
| H | -4.53705900 | -3.31480700 | -2.99456600 |
| N | -4.00833700 | -2.16084400 | -1.35703600 |
| O | -3.04530900 | -1.57014400 | -2.13447900 |

|    |             |             |             |
|----|-------------|-------------|-------------|
| H  | -3.46513600 | -1.00155200 | 0.27931700  |
| Cl | -5.38656700 | -1.82398400 | 2.29476200  |
| Cl | -6.80473600 | -4.83330800 | -1.97818600 |

**SMD-M06/6-31G(d,p)/SDD**

Electronic Energy (0K) = -3750.672334

Electronic Energy (0K) + ZPE = -3750.008284

Enthalpy (333K) = -3749.946585

Free Energy (333K) = -3750.117832

**SMD-M06/6-311++G(d,p)/SDD**

Electronic Energy (0K) = -3751.236145

**A2'**

Number of imaginary frequencies: 0

|   |             |             |             |
|---|-------------|-------------|-------------|
| C | -4.18356700 | -4.79170900 | 2.62078800  |
| C | -3.69575300 | -3.72269400 | 1.88023400  |
| C | -2.63822000 | -3.91059400 | 0.97933300  |
| C | -2.08178000 | -5.19161900 | 0.83199300  |
| C | -2.57258900 | -6.25444700 | 1.57457900  |
| C | -3.62265000 | -6.05649600 | 2.47011900  |
| H | -5.00464600 | -4.63665800 | 3.31654800  |
| H | -1.26474500 | -5.34224500 | 0.12888400  |
| H | -2.13677100 | -7.24342100 | 1.45428200  |
| H | -4.00529000 | -6.89294900 | 3.05049900  |
| C | -2.11806700 | -2.80293100 | 0.19556800  |
| C | -1.23412100 | -2.58451000 | -0.68627700 |
| N | -0.42353400 | -2.24281900 | -1.63351800 |
| C | 0.94981700  | -1.74904700 | -1.37881900 |
| C | 0.95604100  | -0.63916200 | -0.42118700 |
| C | 0.71561800  | 0.21743100  | 0.43063400  |
| C | 0.36623300  | 1.20148500  | 1.43951000  |

|    |             |             |             |
|----|-------------|-------------|-------------|
| S  | -1.01653800 | -2.33135400 | -3.32352800 |
| O  | 0.20172300  | -2.46596200 | -4.10044400 |
| O  | -2.03517100 | -3.35949200 | -3.27779300 |
| C  | -1.74928000 | -0.75566800 | -3.59533400 |
| C  | -0.94999800 | 0.28556900  | -4.06509900 |
| C  | -3.12075700 | -0.59597500 | -3.37740200 |
| C  | -1.54619700 | 1.51116300  | -4.32811400 |
| H  | 0.11003500  | 0.13395700  | -4.25506300 |
| C  | -3.69069700 | 0.63761400  | -3.65359500 |
| H  | -3.73121600 | -1.42816500 | -3.03265800 |
| C  | -2.91827800 | 1.70435200  | -4.13361500 |
| H  | -0.94031300 | 2.32964600  | -4.71211400 |
| H  | -4.76166200 | 0.77872100  | -3.51359300 |
| C  | -3.56156100 | 3.02073500  | -4.42580300 |
| H  | -2.82642900 | 3.77995500  | -4.71114400 |
| H  | -4.11747000 | 3.38988400  | -3.55461600 |
| H  | -4.28704700 | 2.92764400  | -5.24411300 |
| H  | 1.38445400  | -1.45052100 | -2.33883000 |
| H  | 1.55268000  | -2.58319100 | -1.00056000 |
| Au | -2.89827100 | -0.78289600 | 0.38921000  |
| P  | -3.95108600 | 1.26586300  | 0.83966600  |
| Au | 3.07100300  | 0.02604800  | 0.12386500  |
| P  | 5.37897900  | 0.28682000  | 0.32662400  |
| H  | -4.13438300 | -2.73037800 | 1.98931000  |
| H  | 0.88850300  | 2.15011000  | 1.26881700  |
| H  | -0.71373500 | 1.39901000  | 1.40307700  |
| H  | 0.62025400  | 0.83828400  | 2.44190200  |
| C  | -5.47046100 | 1.48332600  | -0.13733000 |
| C  | -5.88193100 | 2.73840500  | -0.59434500 |
| C  | -6.25273500 | 0.35278100  | -0.40035900 |

|   |             |             |             |
|---|-------------|-------------|-------------|
| C | -7.06830900 | 2.85712200  | -1.31256200 |
| H | -5.27985500 | 3.62313900  | -0.39020000 |
| C | -7.44094000 | 0.47963500  | -1.11041400 |
| H | -5.92558800 | -0.62670000 | -0.04778300 |
| C | -7.84561000 | 1.73125400  | -1.56964500 |
| H | -7.38648100 | 3.83373300  | -1.67004400 |
| H | -8.04680200 | -0.40025600 | -1.31383100 |
| H | -8.77135400 | 1.82866800  | -2.13216100 |
| C | -2.90187100 | 2.71732100  | 0.50782500  |
| C | -2.73127700 | 3.74433300  | 1.43845300  |
| C | -2.23521700 | 2.77533300  | -0.72287100 |
| C | -1.89894700 | 4.82035200  | 1.13846400  |
| H | -3.24399600 | 3.70966100  | 2.39792400  |
| C | -1.41611700 | 3.85711300  | -1.02064800 |
| H | -2.36138700 | 1.97037600  | -1.45080800 |
| C | -1.24480700 | 4.87898400  | -0.08738700 |
| H | -1.76752200 | 5.61715500  | 1.86686600  |
| H | -0.90435300 | 3.90443500  | -1.97966400 |
| H | -0.59845400 | 5.72247900  | -0.31921100 |
| C | -4.43767300 | 1.34037300  | 2.59210100  |
| C | -5.51233000 | 2.12835600  | 3.01706300  |
| C | -3.69547600 | 0.61318300  | 3.52941700  |
| C | -5.83504300 | 2.18856400  | 4.36837900  |
| H | -6.09683400 | 2.69667700  | 2.29465400  |
| C | -4.02122200 | 0.67999100  | 4.87978600  |
| H | -2.86689500 | -0.01504700 | 3.19687000  |
| C | -5.09099200 | 1.46639900  | 5.29792300  |
| H | -6.67270600 | 2.80001600  | 4.69550600  |
| H | -3.44477500 | 0.10995500  | 5.60470800  |
| H | -5.34977200 | 1.51294600  | 6.35331200  |



|   |            |             |             |
|---|------------|-------------|-------------|
| C | 5.80614500 | 1.97403700  | 0.84996500  |
| C | 6.94830700 | 2.62007700  | 0.37008400  |
| C | 4.98311600 | 2.61060100  | 1.78610600  |
| C | 7.26212400 | 3.89658700  | 0.82683700  |
| H | 7.59489700 | 2.12867700  | -0.35539600 |
| C | 5.30651500 | 3.88243300  | 2.24290500  |
| H | 4.09017900 | 2.10533100  | 2.15868200  |
| C | 6.44429100 | 4.52554200  | 1.76076300  |
| H | 8.14997900 | 4.39977200  | 0.45130800  |
| H | 4.66718000 | 4.37500200  | 2.97178400  |
| H | 6.69293500 | 5.52385600  | 2.11355700  |
| C | 6.23381100 | -0.02247800 | -1.24798200 |
| C | 7.44090300 | -0.72379700 | -1.30110400 |
| C | 5.67307800 | 0.49517900  | -2.42145000 |
| C | 8.07893500 | -0.90702200 | -2.52458300 |
| H | 7.88568400 | -1.12598700 | -0.39232100 |
| C | 6.31933300 | 0.31422800  | -3.63780200 |
| H | 4.73204900 | 1.04510400  | -2.37939200 |
| C | 7.52039400 | -0.39010500 | -3.68921900 |
| H | 9.01688800 | -1.45575700 | -2.56478600 |
| H | 5.88271900 | 0.71823700  | -4.54814900 |
| H | 8.02179700 | -0.53764800 | -4.64302400 |
| C | 6.07633500 | -0.85855100 | 1.55203900  |
| C | 7.12477600 | -0.48166300 | 2.39503100  |
| C | 5.56690100 | -2.16076100 | 1.60696000  |
| C | 7.65754900 | -1.40647100 | 3.28809200  |
| H | 7.52776800 | 0.52908600  | 2.35539800  |
| C | 6.10845900 | -3.08079600 | 2.49609000  |
| H | 4.74600900 | -2.45022800 | 0.94922500  |
| C | 7.15158000 | -2.70186900 | 3.33817800  |

|   |            |             |            |
|---|------------|-------------|------------|
| H | 8.47184800 | -1.11223700 | 3.94593500 |
| H | 5.71264200 | -4.09283500 | 2.53713400 |
| H | 7.56997900 | -3.42044900 | 4.03926300 |

**SMD-M06/6-31G(d,p)/SDD**

Electronic Energy (0K) = -3679.730641

Electronic Energy (0K) + ZPE = -3678.868148

Enthalpy (333K) = -3678.792458

Free Energy (333K) = -3678.994158

**SMD-M06/6-311++G(d,p)/SDD**

Electronic Energy (0K) = -3680.335591

**TS<sub>B'</sub>**

Number of imaginary frequencies: 1

|   |             |             |             |
|---|-------------|-------------|-------------|
| C | 1.13304700  | 4.69026400  | 1.41799100  |
| C | 0.83756900  | 3.39355700  | 1.02260300  |
| C | 1.66097000  | 2.68411600  | 0.12158000  |
| C | 2.78506000  | 3.36640500  | -0.39555700 |
| C | 3.06296500  | 4.67205500  | -0.01904100 |
| C | 2.24765800  | 5.33748400  | 0.89440900  |
| H | 0.48368900  | 5.19989000  | 2.12605000  |
| H | 3.42849700  | 2.88083600  | -1.12046700 |
| H | 3.92549600  | 5.17845700  | -0.44687000 |
| H | 2.47553500  | 6.36017400  | 1.18663600  |
| C | 1.27846400  | 1.30328300  | -0.18759900 |
| C | 2.12213400  | 0.36894200  | -0.76260400 |
| N | 1.77515500  | -1.00482700 | -0.87409600 |
| C | 1.73219300  | -1.58908200 | -2.22807700 |
| C | 0.62924500  | -1.02602700 | -2.99514500 |
| C | -0.29703400 | -0.54538100 | -3.60996200 |
| C | -1.41427900 | 0.02052700  | -4.34316400 |

|    |             |             |             |
|----|-------------|-------------|-------------|
| S  | 2.11847300  | -2.06864500 | 0.39355500  |
| O  | 3.11460900  | -3.03066500 | -0.07082100 |
| O  | 2.40361100  | -1.23315300 | 1.55642000  |
| C  | 0.59944400  | -2.93575400 | 0.67882900  |
| C  | 0.36820300  | -4.15979900 | 0.05614800  |
| C  | -0.33293300 | -2.38378700 | 1.55720400  |
| C  | -0.82439600 | -4.82802900 | 0.30803200  |
| H  | 1.11915000  | -4.59746300 | -0.59758000 |
| C  | -1.51268500 | -3.07226800 | 1.80253700  |
| H  | -0.12516600 | -1.44112700 | 2.06019200  |
| C  | -1.77961400 | -4.29797800 | 1.18086800  |
| H  | -1.01079000 | -5.78853600 | -0.16971000 |
| H  | -2.24205700 | -2.65677400 | 2.49746900  |
| C  | -3.07082400 | -5.00939400 | 1.43426700  |
| H  | -2.97969300 | -6.08815200 | 1.26771100  |
| H  | -3.85773300 | -4.64284900 | 0.76010100  |
| H  | -3.42603900 | -4.84615400 | 2.45820700  |
| H  | 1.61204300  | -2.67493200 | -2.13556700 |
| H  | 2.69291700  | -1.43404100 | -2.74029600 |
| Au | -0.74206200 | 0.76419400  | -0.02043600 |
| P  | -3.09508100 | 0.46161300  | 0.03062500  |
| H  | -2.25032600 | -0.68798500 | -4.40248100 |
| H  | -1.78204900 | 0.93250700  | -3.85533700 |
| H  | -1.12660000 | 0.28696700  | -5.36726300 |
| H  | -0.04436000 | 2.89501300  | 1.42592600  |
| C  | -3.74378700 | -0.16964900 | 1.61645000  |
| C  | -4.72091000 | -1.16487400 | 1.68797600  |
| C  | -3.23110600 | 0.38548800  | 2.79528200  |
| C  | -5.17733700 | -1.60279100 | 2.92913100  |
| H  | -5.12928000 | -1.60008700 | 0.77678700  |

|   |             |             |             |
|---|-------------|-------------|-------------|
| C | -3.69451200 | -0.05006100 | 4.03098600  |
| H | -2.46521400 | 1.16116800  | 2.74195800  |
| C | -4.66538500 | -1.04792600 | 4.09819600  |
| H | -5.93658900 | -2.38036000 | 2.97980400  |
| H | -3.29355400 | 0.38557000  | 4.94338000  |
| H | -5.02291300 | -1.39313800 | 5.06573000  |
| C | -3.71884600 | -0.66886700 | -1.25702400 |
| C | -4.88748200 | -0.42036500 | -1.98103500 |
| C | -2.98680500 | -1.83627800 | -1.50200300 |
| C | -5.31984800 | -1.33553100 | -2.93685800 |
| H | -5.46257000 | 0.48659800  | -1.80247900 |
| C | -3.42710900 | -2.75223000 | -2.45095200 |
| H | -2.07276500 | -2.02859500 | -0.93699700 |
| C | -4.59360700 | -2.49997300 | -3.17077200 |
| H | -6.22911100 | -1.13676500 | -3.49971500 |
| H | -2.85356800 | -3.65920400 | -2.63194100 |
| H | -4.93621900 | -3.21257200 | -3.91782300 |
| C | -3.93485900 | 2.06112300  | -0.22674900 |
| C | -5.23052200 | 2.29702200  | 0.24466900  |
| C | -3.26392700 | 3.06316100  | -0.93640800 |
| C | -5.84828200 | 3.51873300  | -0.00029000 |
| H | -5.75925300 | 1.52455800  | 0.80228800  |
| C | -3.88735000 | 4.28266700  | -1.18126700 |
| H | -2.24624900 | 2.88652500  | -1.28885200 |
| C | -5.17822000 | 4.50985200  | -0.71319300 |
| H | -6.85578900 | 3.69742900  | 0.36851200  |
| H | -3.36006300 | 5.05891700  | -1.73125900 |
| H | -5.66333200 | 5.46546300  | -0.89989200 |
| C | 6.83895300  | -0.35850400 | -0.72649400 |
| C | 6.95313800  | -0.26254400 | 0.65753000  |

|    |            |             |             |
|----|------------|-------------|-------------|
| C  | 5.84320500 | 0.14339700  | 1.38917700  |
| C  | 4.65432200 | 0.44973800  | 0.73887100  |
| C  | 5.63597900 | -0.05701900 | -1.35137800 |
| H  | 7.88918900 | -0.50187800 | 1.15568400  |
| H  | 5.46443900 | -0.11265900 | -2.42378200 |
| N  | 4.63000500 | 0.32306100  | -0.57639200 |
| O  | 3.23652200 | 0.71345500  | -1.39070700 |
| H  | 3.73512600 | 0.75096700  | 1.24062600  |
| Cl | 5.91718900 | 0.27129900  | 3.11040300  |
| Cl | 8.18512800 | -0.86729300 | -1.68447600 |

**SMD-M06/6-31G(d,p)/SDD**

Electronic Energy (0K) = -3750.665898

Electronic Energy (0K) + ZPE = -3750.004520

Enthalpy (333K) = -3749.943037

Free Energy (333K) = -3750.111154

**SMD-M06/6-311++G(d,p)/SDD**

Electronic Energy (0K) = -3751.229894

[N] (*Au catalysis system*)

Number of imaginary frequencies: 0

|    |             |             |             |
|----|-------------|-------------|-------------|
| C  | 1.18060100  | -0.00916300 | -0.00006800 |
| C  | 0.00000900  | -0.73929800 | -0.00003100 |
| C  | -1.18044400 | -0.01043700 | -0.00001800 |
| C  | -1.14690700 | 1.38160600  | 0.00006400  |
| C  | 1.14733500  | 1.38173600  | -0.00016300 |
| H  | 0.00106800  | -1.82621100 | -0.00002000 |
| H  | 2.07368700  | 1.95550600  | -0.00014800 |
| N  | -0.00043400 | 2.05433900  | 0.00007900  |
| H  | -2.07403600 | 1.95469600  | 0.00020500  |
| Cl | -2.71662900 | -0.83789300 | -0.00000800 |

|    |            |             |            |
|----|------------|-------------|------------|
| Cl | 2.71655600 | -0.83805000 | 0.00005000 |
|----|------------|-------------|------------|

**SMD-M06/6-31G(d,p)/SDD**

Electronic Energy (0K) = -1167.245319

Electronic Energy (0K) + ZPE = -1167.175884

Enthalpy (333K) = -1167.166853

Free Energy (333K) = -1167.211861

**SMD-M06/6-311++G(d,p)/SDD**

Electronic Energy (0K) = -1167.361999

**C'**

Number of imaginary frequencies: 0

|   |            |             |             |
|---|------------|-------------|-------------|
| C | 2.49097300 | 4.57471300  | -1.69302200 |
| C | 1.92609100 | 3.39925400  | -1.23376500 |
| C | 2.74444400 | 2.31136900  | -0.84699500 |
| C | 4.15311600 | 2.45238700  | -0.92310400 |
| C | 4.71058700 | 3.63219000  | -1.37208600 |
| C | 3.88011600 | 4.68893700  | -1.75889800 |
| H | 1.85989500 | 5.40477100  | -1.99836300 |
| H | 4.79489300 | 1.62838100  | -0.61629000 |
| H | 5.79019500 | 3.74142500  | -1.42648300 |
| H | 4.32553100 | 5.61473200  | -2.11625300 |
| C | 2.14273700 | 1.11873900  | -0.36290700 |
| C | 2.92647000 | -0.13499300 | -0.35372100 |
| N | 3.23899800 | -0.80321200 | 0.80256000  |
| C | 2.87577300 | -0.32910700 | 2.15519900  |
| C | 2.63171600 | 1.10056600  | 2.18613100  |
| C | 2.41771700 | 2.28878900  | 2.30843000  |
| C | 2.14826100 | 3.70788300  | 2.37205100  |
| S | 3.66937200 | -2.48800600 | 0.66972500  |
| O | 3.79834900 | -2.90728400 | 2.05683000  |

|    |             |             |             |
|----|-------------|-------------|-------------|
| O  | 4.78794500  | -2.60288100 | -0.24347600 |
| C  | 2.21227100  | -3.20964100 | -0.02292700 |
| C  | 1.13394900  | -3.46755400 | 0.82649400  |
| C  | 2.15230100  | -3.48866100 | -1.38470700 |
| C  | -0.02193400 | -4.00995700 | 0.28732400  |
| H  | 1.20447000  | -3.26910000 | 1.89387800  |
| C  | 0.98399100  | -4.03580800 | -1.90177600 |
| H  | 3.00462200  | -3.27974300 | -2.02463400 |
| C  | -0.11599400 | -4.29981700 | -1.08072300 |
| H  | -0.86769700 | -4.22846300 | 0.93789600  |
| H  | 0.92510300  | -4.26424200 | -2.96451800 |
| C  | -1.37233200 | -4.89300300 | -1.63390800 |
| H  | -2.25580800 | -4.33435500 | -1.29939300 |
| H  | -1.36913900 | -4.90460000 | -2.72873300 |
| H  | -1.50157800 | -5.92702100 | -1.28826200 |
| H  | 1.98349500  | -0.86881400 | 2.50550200  |
| H  | 3.69644100  | -0.58519100 | 2.83290800  |
| O  | 3.13151900  | -0.57830500 | -1.47773200 |
| Au | 0.11095000  | 0.75104500  | -0.14759800 |
| P  | -2.21526100 | 0.34827100  | 0.07377400  |
| H  | 2.12315200  | 4.04958600  | 3.41389900  |
| H  | 2.92679000  | 4.28268200  | 1.85562800  |
| H  | 1.17555900  | 3.94736700  | 1.92257200  |
| H  | 0.84465600  | 3.28408500  | -1.16966400 |
| C  | -3.13959900 | 1.84572000  | 0.55527600  |
| C  | -4.07239900 | 1.85183200  | 1.59399100  |
| C  | -2.89844100 | 3.01905700  | -0.17018400 |
| C  | -4.75532100 | 3.02526000  | 1.90475200  |
| H  | -4.27136700 | 0.94335900  | 2.16034900  |
| C  | -3.58716900 | 4.18450000  | 0.14052700  |

|   |             |             |             |
|---|-------------|-------------|-------------|
| H | -2.17897100 | 3.01437500  | -0.99029300 |
| C | -4.51369000 | 4.18844500  | 1.18154700  |
| H | -5.48086400 | 3.02641200  | 2.71504700  |
| H | -3.39898300 | 5.09238900  | -0.42808400 |
| H | -5.04910300 | 5.10259300  | 1.42815500  |
| C | -2.60231700 | -0.91473400 | 1.32715400  |
| C | -3.62024900 | -1.85506200 | 1.15133300  |
| C | -1.86650400 | -0.90041800 | 2.51841800  |
| C | -3.89990500 | -2.77111800 | 2.16178500  |
| H | -4.19704900 | -1.87636300 | 0.22823000  |
| C | -2.15358600 | -1.81396000 | 3.52591600  |
| H | -1.07540900 | -0.16180100 | 2.65882900  |
| C | -3.16977400 | -2.75029100 | 3.34660300  |
| H | -4.69285400 | -3.50214400 | 2.02140000  |
| H | -1.58203200 | -1.79740500 | 4.45108500  |
| H | -3.39135100 | -3.46744100 | 4.13370800  |
| C | -2.93649300 | -0.20222400 | -1.50339100 |
| C | -4.29622800 | -0.04341100 | -1.79136900 |
| C | -2.09515700 | -0.81754900 | -2.43556000 |
| C | -4.80643500 | -0.51332600 | -2.99655400 |
| H | -4.95577600 | 0.44484500  | -1.07441300 |
| C | -2.61176800 | -1.29180500 | -3.63664500 |
| H | -1.03071500 | -0.91229600 | -2.21497200 |
| C | -3.96686800 | -1.13926000 | -3.91550600 |
| H | -5.86353600 | -0.38904900 | -3.21998800 |
| H | -1.95308000 | -1.77149800 | -4.35733900 |
| H | -4.37115600 | -1.50342700 | -4.85735700 |

**SMD-M06/6-31G(d,p)/SDD**

Electronic Energy (0K) = -2583.494865

Electronic Energy (0K) + ZPE = -2582.902093



Enthalpy (333K) = -2582.850034

Free Energy (333K) = -2582.994588

**SMD-M06/6-311++G(d,p)/SDD**

Electronic Energy (0K) = -2583.942206

**TS<sub>C'</sub>**

Number of imaginary frequencies: 1

|   |             |             |             |
|---|-------------|-------------|-------------|
| C | -2.94224300 | 4.25776000  | 1.72688600  |
| C | -2.29597000 | 3.18300600  | 1.13340800  |
| C | -3.02119600 | 2.05170600  | 0.71761400  |
| C | -4.42017600 | 2.03903000  | 0.89232600  |
| C | -5.06314700 | 3.11684400  | 1.47541800  |
| C | -4.32415800 | 4.22457500  | 1.89587800  |
| H | -2.37160200 | 5.12239100  | 2.05611600  |
| H | -4.99859800 | 1.17866600  | 0.55812400  |
| H | -6.14195700 | 3.09978400  | 1.60765100  |
| H | -4.83274700 | 5.06773600  | 2.35795900  |
| C | -2.33322200 | 0.93143500  | 0.10365200  |
| C | -2.91605700 | -0.42689000 | 0.30777700  |
| N | -3.12055400 | -1.20867900 | -0.80756400 |
| C | -2.86643800 | -0.63535700 | -2.13191600 |
| C | -2.77762500 | 0.81536300  | -1.98398400 |
| C | -2.76395900 | 2.01836100  | -2.21762500 |
| C | -2.69622700 | 3.44912400  | -2.30651800 |
| S | -3.20996700 | -2.92571600 | -0.65211700 |
| O | -3.22308100 | -3.37614600 | -2.03582000 |
| O | -4.30075900 | -3.24484900 | 0.24647800  |
| C | -1.66018200 | -3.34068000 | 0.08775600  |
| C | -0.52635500 | -3.37902100 | -0.72622100 |
| C | -1.58850500 | -3.60815200 | 1.45130700  |

|    |             |             |             |
|----|-------------|-------------|-------------|
| C  | 0.69452800  | -3.69960900 | -0.15349700 |
| H  | -0.60112700 | -3.18857600 | -1.79495400 |
| C  | -0.35472100 | -3.93384700 | 2.00273100  |
| H  | -2.48378800 | -3.56732500 | 2.06505600  |
| C  | 0.79840400  | -3.98884500 | 1.21422200  |
| H  | 1.58592800  | -3.74766400 | -0.77863600 |
| H  | -0.28570100 | -4.15533700 | 3.06653700  |
| C  | 2.11957600  | -4.37557500 | 1.79887700  |
| H  | 2.91354800  | -3.67911600 | 1.50043700  |
| H  | 2.08795600  | -4.41556300 | 2.89242400  |
| H  | 2.42370000  | -5.36793200 | 1.43989200  |
| H  | -1.93043600 | -1.02649000 | -2.55662500 |
| H  | -3.68252800 | -0.89293100 | -2.81461700 |
| O  | -3.04581800 | -0.81936700 | 1.45492400  |
| Au | -0.23945100 | 0.75155400  | -0.02025100 |
| P  | 2.11643700  | 0.52493500  | -0.09206600 |
| H  | -2.90307000 | 3.76116700  | -3.33905900 |
| H  | -3.45420500 | 3.91858100  | -1.66609200 |
| H  | -1.69848500 | 3.82028500  | -2.03865500 |
| H  | -1.21544000 | 3.19425400  | 0.99245100  |
| C  | 2.65861200  | -0.59451500 | -1.42304500 |
| C  | 3.76746500  | -1.43595600 | -1.30174100 |
| C  | 1.93084200  | -0.57602000 | -2.61926700 |
| C  | 4.13794700  | -2.25478400 | -2.36493400 |
| H  | 4.34296500  | -1.45871600 | -0.37826100 |
| C  | 2.30614500  | -1.39384100 | -3.67881800 |
| H  | 1.06573800  | 0.08199000  | -2.71692100 |
| C  | 3.40801600  | -2.23618600 | -3.55000800 |
| H  | 4.99979400  | -2.91041300 | -2.26450400 |
| H  | 1.73569200  | -1.37697000 | -4.60465700 |

|   |            |             |             |
|---|------------|-------------|-------------|
| H | 3.69794000 | -2.88087300 | -4.37660700 |
| C | 2.95865300 | 2.11732000  | -0.38445300 |
| C | 2.60501400 | 3.19404600  | 0.43839000  |
| C | 3.92253800 | 2.29089100  | -1.37897600 |
| C | 3.21475200 | 4.43026000  | 0.26812100  |
| H | 1.85782600 | 3.05723300  | 1.22168100  |
| C | 4.52582900 | 3.53494400  | -1.54879400 |
| H | 4.20796300 | 1.45895300  | -2.02093600 |
| C | 4.17339000 | 4.60170800  | -0.72904600 |
| H | 2.94006600 | 5.26272300  | 0.91195100  |
| H | 5.27644800 | 3.66693000  | -2.32482600 |
| H | 4.64673400 | 5.57141900  | -0.86585800 |
| C | 2.77145100 | -0.09325600 | 1.49012500  |
| C | 4.13231500 | 0.00000200  | 1.80635300  |
| C | 1.88335400 | -0.65696900 | 2.41214700  |
| C | 4.59744900 | -0.49060200 | 3.02079100  |
| H | 4.82786300 | 0.46187600  | 1.10608700  |
| C | 2.35317800 | -1.13833500 | 3.63065700  |
| H | 0.81878500 | -0.70510000 | 2.17691200  |
| C | 3.70949600 | -1.06023700 | 3.93138900  |
| H | 5.65572400 | -0.42007800 | 3.26137200  |
| H | 1.65588400 | -1.57306400 | 4.34393200  |
| H | 4.07716500 | -1.43573700 | 4.88372300  |

**SMD-M06/6-31G(d,p)/SDD**

Electronic Energy (0K) = -2583.491903

Electronic Energy (0K) + ZPE = -2582.901527

Enthalpy (333K) = -2582.849626

Free Energy (333K) = -2582.993628

**SMD-M06/6-311++G(d,p)/SDD**

Electronic Energy (0K) = -2583.938747

**D'**

Number of imaginary frequencies: 0

|   |             |             |             |
|---|-------------|-------------|-------------|
| C | 2.62410700  | 4.64579700  | -0.77205700 |
| C | 2.47288900  | 3.42663500  | -0.12199300 |
| C | 2.67149000  | 2.21173000  | -0.79153400 |
| C | 2.99262800  | 2.25188200  | -2.15443200 |
| C | 3.13869200  | 3.47375300  | -2.80421000 |
| C | 2.96067600  | 4.67390500  | -2.12228400 |
| H | 2.47032100  | 5.57241800  | -0.22339600 |
| H | 3.13791900  | 1.32203300  | -2.69616000 |
| H | 3.40467100  | 3.48320400  | -3.85929600 |
| H | 3.08110900  | 5.62360700  | -2.63812000 |
| C | 2.51974500  | 0.93545400  | -0.03919600 |
| C | 2.95216400  | -0.37434700 | -0.58914900 |
| N | 3.31386600  | -1.19710600 | 0.49851600  |
| C | 3.13834400  | -0.55473900 | 1.79098200  |
| C | 2.95282500  | 0.90593400  | 1.37198800  |
| C | 3.24794100  | 1.86684700  | 2.18439900  |
| C | 3.49926600  | 2.77308700  | 3.23339800  |
| S | 3.28883400  | -2.90264300 | 0.39374600  |
| O | 3.45167400  | -3.32864100 | 1.77685300  |
| O | 4.24045700  | -3.29555000 | -0.62672400 |
| C | 1.64723600  | -3.27540400 | -0.14640300 |
| C | 0.62844900  | -3.35963700 | 0.80405100  |
| C | 1.39225700  | -3.45427500 | -1.50398700 |
| C | -0.66543800 | -3.62214600 | 0.37611500  |
| H | 0.84682900  | -3.24321200 | 1.86406600  |
| C | 0.08976800  | -3.71663700 | -1.90950100 |
| H | 2.20226600  | -3.39442500 | -2.22493500 |

|    |             |             |             |
|----|-------------|-------------|-------------|
| C  | -0.95538400 | -3.79809200 | -0.98329500 |
| H  | -1.46973000 | -3.69918900 | 1.10774600  |
| H  | -0.12180800 | -3.86635800 | -2.96727300 |
| C  | -2.36135200 | -4.04091100 | -1.43183300 |
| H  | -2.92746200 | -3.09769000 | -1.45750400 |
| H  | -2.39804900 | -4.46821000 | -2.43981300 |
| H  | -2.89315300 | -4.71444800 | -0.74931800 |
| H  | 2.22801000  | -0.88998900 | 2.30842700  |
| H  | 4.00245400  | -0.69778700 | 2.44351000  |
| O  | 2.96880400  | -0.74245600 | -1.74715100 |
| Au | 0.33805800  | 0.60566100  | 0.05982800  |
| P  | -1.99989900 | 0.45627500  | 0.13930500  |
| H  | 3.85664800  | 2.08353000  | 4.03114800  |
| H  | 4.33015100  | 3.46161300  | 3.04029300  |
| H  | 2.60703100  | 3.27392700  | 3.62849100  |
| H  | 2.13453100  | 3.42465700  | 0.91870800  |
| C  | -2.73700100 | 2.05412400  | 0.61698100  |
| C  | -3.84566400 | 2.14165200  | 1.46239100  |
| C  | -2.16880000 | 3.22006900  | 0.08968800  |
| C  | -4.38130800 | 3.38802900  | 1.77468900  |
| H  | -4.29318500 | 1.23965600  | 1.87752700  |
| C  | -2.71261200 | 4.46063700  | 0.39986000  |
| H  | -1.29795400 | 3.15267500  | -0.56513500 |
| C  | -3.81738200 | 4.54442600  | 1.24461800  |
| H  | -5.24316200 | 3.45331400  | 2.43490300  |
| H  | -2.26890300 | 5.36389900  | -0.01265500 |
| H  | -4.23809200 | 5.51627100  | 1.49295600  |
| C  | -2.59654200 | -0.76379400 | 1.35403000  |
| C  | -3.64262100 | -1.64888400 | 1.08569300  |
| C  | -1.96681200 | -0.79278800 | 2.60489700  |

|   |             |             |             |
|---|-------------|-------------|-------------|
| C | -4.05042500 | -2.55803300 | 2.05934400  |
| H | -4.14016300 | -1.63703500 | 0.11738900  |
| C | -2.38243600 | -1.69569000 | 3.57543000  |
| H | -1.14551300 | -0.10530300 | 2.81502300  |
| C | -3.42304700 | -2.58202700 | 3.30100900  |
| H | -4.86260200 | -3.24855400 | 1.84305800  |
| H | -1.89170900 | -1.71236700 | 4.54588900  |
| H | -3.74431500 | -3.29341800 | 4.05839200  |
| C | -2.69960700 | 0.02555500  | -1.48389300 |
| C | -4.04644500 | 0.25972100  | -1.78485300 |
| C | -1.86465000 | -0.55709400 | -2.44322900 |
| C | -4.55297800 | -0.10815000 | -3.02596300 |
| H | -4.69954400 | 0.72884900  | -1.04944900 |
| C | -2.37633500 | -0.91930600 | -3.68577000 |
| H | -0.81029000 | -0.72299300 | -2.21397500 |
| C | -3.71965600 | -0.69837300 | -3.97418600 |
| H | -5.60046900 | 0.07208800  | -3.25623300 |
| H | -1.72212100 | -1.37088500 | -4.42850500 |
| H | -4.11956200 | -0.97949100 | -4.94588200 |

**SMD-M06/6-31G(d,p)/SDD**

Electronic Energy (0K) = -2583.512850

Electronic Energy (0K) + ZPE = -2582.922261

Enthalpy (333K) = -2582.870314

Free Energy (333K) = -2583.015524

**SMD-M06/6-311++G(d,p)/SDD**

Electronic Energy (0K) = -2583.957993

**TS<sub>D'</sub>**

Number of imaginary frequencies: 1

|   |             |             |            |
|---|-------------|-------------|------------|
| C | -0.13144700 | -5.25231400 | 0.89226800 |
|---|-------------|-------------|------------|

|   |             |             |             |
|---|-------------|-------------|-------------|
| C | 0.69380700  | -4.35038800 | 0.22650300  |
| C | 1.13027800  | -3.17548000 | 0.86489600  |
| C | 0.77586500  | -2.95683000 | 2.21176100  |
| C | -0.02915400 | -3.86889500 | 2.87048700  |
| C | -0.49368000 | -5.01182400 | 2.21116400  |
| H | -0.45853000 | -6.15823200 | 0.38815900  |
| H | 1.12263000  | -2.05656200 | 2.71240300  |
| H | -0.30725200 | -3.68995500 | 3.90642600  |
| H | -1.12023500 | -5.72572300 | 2.74084100  |
| C | 1.84418700  | -2.16815900 | 0.10466900  |
| C | 2.84743000  | -1.21288600 | 0.64776500  |
| N | 3.46220300  | -0.63914200 | -0.47018300 |
| C | 2.97776300  | -1.16965100 | -1.73369900 |
| C | 1.84770700  | -2.08301800 | -1.29945800 |
| C | 1.00166800  | -2.78945500 | -2.16154800 |
| C | 1.49590400  | -3.40682100 | -3.38158500 |
| S | 4.40210800  | 0.78912300  | -0.40008200 |
| O | 4.74950100  | 1.03083900  | -1.79220000 |
| O | 5.42527900  | 0.58899400  | 0.60669900  |
| C | 3.26137100  | 2.02538700  | 0.14200800  |
| C | 2.46243200  | 2.66041500  | -0.80728200 |
| C | 3.19338000  | 2.35826600  | 1.49467600  |
| C | 1.59078400  | 3.65736500  | -0.38716200 |
| H | 2.54713900  | 2.41043400  | -1.86292500 |
| C | 2.30877700  | 3.35073100  | 1.89125800  |
| H | 3.83217800  | 1.85503700  | 2.21526400  |
| C | 1.50236000  | 4.01961600  | 0.96078400  |
| H | 0.98928600  | 4.18668900  | -1.12390400 |
| H | 2.25011900  | 3.62898800  | 2.94281700  |
| C | 0.57757900  | 5.10494700  | 1.41254800  |

|    |             |             |             |
|----|-------------|-------------|-------------|
| H  | 0.06875300  | 5.58429700  | 0.56994800  |
| H  | -0.19063000 | 4.71393400  | 2.09250900  |
| H  | 1.12149700  | 5.88009100  | 1.96650500  |
| H  | 2.65659300  | -0.37804300 | -2.41989900 |
| H  | 3.74597100  | -1.77549100 | -2.23586300 |
| O  | 3.06906300  | -0.93355900 | 1.80675100  |
| Au | 0.00807100  | -0.68976200 | -0.52579900 |
| P  | -1.94129300 | 0.50286300  | -0.12307900 |
| H  | 1.50759600  | -2.53770000 | -4.07596000 |
| H  | 2.52105700  | -3.80317100 | -3.35368500 |
| H  | 0.80021100  | -4.11939300 | -3.83523900 |
| H  | 1.07550400  | -4.60233300 | -0.76372700 |
| C  | -3.37957700 | -0.53817000 | -0.52687100 |
| C  | -4.53585600 | -0.00850100 | -1.10480800 |
| C  | -3.31684200 | -1.90040800 | -0.21300200 |
| C  | -5.62082900 | -0.84082500 | -1.36506300 |
| H  | -4.59353000 | 1.05076200  | -1.35134500 |
| C  | -4.40523000 | -2.72437500 | -0.46966900 |
| H  | -2.40906900 | -2.31291200 | 0.23044500  |
| C  | -5.55623800 | -2.19425800 | -1.04860800 |
| H  | -6.51912800 | -0.42784900 | -1.81803100 |
| H  | -4.35104000 | -3.78287900 | -0.22588100 |
| H  | -6.40525900 | -2.84108700 | -1.25803300 |
| C  | -2.10780300 | 2.01590500  | -1.11420300 |
| C  | -2.62685100 | 3.19907800  | -0.58412900 |
| C  | -1.75192800 | 1.95063900  | -2.46679400 |
| C  | -2.79729500 | 4.30764700  | -1.40944100 |
| H  | -2.90236500 | 3.25886800  | 0.46756500  |
| C  | -1.92971800 | 3.05904400  | -3.28498900 |
| H  | -1.34270800 | 1.02588000  | -2.87654700 |



|   |             |            |             |
|---|-------------|------------|-------------|
| C | -2.45286100 | 4.23745100 | -2.75564800 |
| H | -3.20211200 | 5.22847400 | -0.99599800 |
| H | -1.65671400 | 3.00539500 | -4.33631300 |
| H | -2.58883900 | 5.10580900 | -3.39625100 |
| C | -2.08123400 | 0.93447300 | 1.63706700  |
| C | -3.32902800 | 1.11216500 | 2.24418100  |
| C | -0.91262200 | 1.09092000 | 2.38857200  |
| C | -3.39922000 | 1.45410500 | 3.59023600  |
| H | -4.24475500 | 0.98397100 | 1.66832900  |
| C | -0.98895200 | 1.43653000 | 3.73340400  |
| H | 0.05916300  | 0.94066500 | 1.91411800  |
| C | -2.23231900 | 1.61625400 | 4.33310000  |
| H | -4.36979700 | 1.59031200 | 4.06140500  |
| H | -0.07602900 | 1.55737300 | 4.31249800  |
| H | -2.29341400 | 1.87832000 | 5.38696800  |

**SMD-M06/6-31G(d,p)/SDD**

Electronic Energy (0K) = -2583.503056

Electronic Energy (0K) + ZPE = -2582.910945

Enthalpy (333K) = -2582.860682

Free Energy (333K) = -2582.999089

**SMD-M06/6-311++G(d,p)/SDD**

Electronic Energy (0K) = -2583.947162

**E'**

Number of imaginary frequencies: 0

|   |             |             |            |
|---|-------------|-------------|------------|
| C | -0.92104300 | -2.67883800 | 2.25711800 |
| C | -0.01861200 | -2.48421200 | 1.21917700 |
| C | 1.10455500  | -1.64579400 | 1.39820900 |
| C | 1.30675000  | -1.03205100 | 2.65194600 |
| C | 0.38725300  | -1.21553900 | 3.67016200 |

|   |             |             |             |
|---|-------------|-------------|-------------|
| C | -0.72552400 | -2.03710500 | 3.47659900  |
| H | -1.76621600 | -3.34926000 | 2.11989800  |
| H | 2.17488500  | -0.39836400 | 2.80289300  |
| H | 0.53556100  | -0.71906500 | 4.62609300  |
| H | -1.43052000 | -2.19286200 | 4.29004700  |
| C | 2.04018100  | -1.43309100 | 0.32777200  |
| C | 3.51584400  | -1.30865600 | 0.57765100  |
| N | 4.09892200  | -1.28841500 | -0.67609400 |
| C | 3.14296800  | -1.38109900 | -1.76671800 |
| C | 1.82101600  | -1.38428500 | -1.03725400 |
| C | 0.58701100  | -1.24558600 | -1.70802700 |
| C | 0.56705500  | -1.47863800 | -3.16402600 |
| S | 5.79153200  | -1.14510800 | -0.93550000 |
| O | 5.90756000  | -1.15315900 | -2.38508100 |
| O | 6.44588500  | -2.15469400 | -0.12574100 |
| C | 6.16065300  | 0.46350200  | -0.31227900 |
| C | 5.96657000  | 1.56217300  | -1.14659100 |
| C | 6.63060100  | 0.60715300  | 0.99226800  |
| C | 6.25128600  | 2.82924100  | -0.65676000 |
| H | 5.61478700  | 1.42904800  | -2.16711300 |
| C | 6.91128400  | 1.88221300  | 1.45810900  |
| H | 6.76984200  | -0.26544700 | 1.62396000  |
| C | 6.72541100  | 3.00823100  | 0.64646700  |
| H | 6.11113500  | 3.69693800  | -1.29874300 |
| H | 7.28538700  | 2.01276500  | 2.47249700  |
| C | 7.03578300  | 4.37163800  | 1.17690500  |
| H | 6.86152700  | 5.15078700  | 0.42795600  |
| H | 6.41983800  | 4.60204800  | 2.05550600  |
| H | 8.08214800  | 4.43955100  | 1.50012100  |
| H | 3.23944400  | -0.53305800 | -2.45700200 |

|    |             |             |             |
|----|-------------|-------------|-------------|
| H  | 3.29031400  | -2.30568200 | -2.34122300 |
| O  | 4.09269700  | -1.22415600 | 1.64098800  |
| Au | -1.14825200 | -0.50562400 | -0.85385600 |
| P  | -3.18060800 | 0.47723300  | -0.09809000 |
| H  | 0.69865500  | -0.48615700 | -3.63429200 |
| H  | 1.35273100  | -2.13892700 | -3.55126500 |
| H  | -0.41631500 | -1.81783300 | -3.50810800 |
| H  | -0.12135400 | -3.04802200 | 0.29458900  |
| C  | -3.19581500 | 0.81283200  | 1.69364500  |
| C  | -4.24870400 | 0.42696400  | 2.52576100  |
| C  | -2.08935400 | 1.47863200  | 2.23641200  |
| C  | -4.19704500 | 0.71277600  | 3.88784700  |
| H  | -5.11149300 | -0.09559000 | 2.11643600  |
| C  | -2.05104200 | 1.77481800  | 3.59344200  |
| H  | -1.25782700 | 1.76934800  | 1.59225000  |
| C  | -3.10382400 | 1.38794400  | 4.42063300  |
| H  | -5.01856500 | 0.40838500  | 4.53240800  |
| H  | -1.19184400 | 2.29704100  | 4.00869000  |
| H  | -3.06910300 | 1.61173600  | 5.48453700  |
| C  | -4.60736200 | -0.59705600 | -0.45610700 |
| C  | -5.90445600 | -0.08882200 | -0.58299500 |
| C  | -4.38485200 | -1.97168000 | -0.58672700 |
| C  | -6.96537300 | -0.95259300 | -0.83180600 |
| H  | -6.08584500 | 0.98125900  | -0.48564800 |
| C  | -5.44976400 | -2.83189100 | -0.83236200 |
| H  | -3.36928100 | -2.36316800 | -0.50641600 |
| C  | -6.73861000 | -2.32153600 | -0.95552400 |
| H  | -7.97273100 | -0.55503500 | -0.93178200 |
| H  | -5.27123300 | -3.89971100 | -0.93626200 |
| H  | -7.57113000 | -2.99269600 | -1.15458800 |

|   |             |            |             |
|---|-------------|------------|-------------|
| C | -3.53107100 | 2.07167000 | -0.91227000 |
| C | -4.09051200 | 3.15364800 | -0.22786900 |
| C | -3.24889100 | 2.18448400 | -2.27837900 |
| C | -4.36310200 | 4.33757700 | -0.90730900 |
| H | -4.31528100 | 3.07474800 | 0.83490400  |
| C | -3.52948400 | 3.36660200 | -2.95306200 |
| H | -2.80851400 | 1.34155300 | -2.81259900 |
| C | -4.08351700 | 4.44438200 | -2.26632000 |
| H | -4.79680000 | 5.17855300 | -0.37103600 |
| H | -3.30889200 | 3.44940900 | -4.01489100 |
| H | -4.29599100 | 5.37213300 | -2.79295300 |

**SMD-M06/6-31G(d,p)/SDD**

Electronic Energy (0K) = -2583.557577

Electronic Energy (0K) + ZPE = -2582.964416

Enthalpy (333K) = -2582.912784

Free Energy (333K) = -2583.061086

**SMD-M06/6-311++G(d,p)/SDD**

Electronic Energy (0K) = -2584.000794

**TS<sub>E'</sub>**

Number of imaginary frequencies: 1

|   |             |             |             |
|---|-------------|-------------|-------------|
| C | 1.15231500  | -3.77274200 | -1.16527000 |
| C | -0.07905000 | -3.45044600 | -0.53763500 |
| C | -1.07372500 | -2.71773900 | -1.26279700 |
| C | -0.87159000 | -2.42508800 | -2.62280800 |
| C | 0.32811500  | -2.77149400 | -3.20956100 |
| C | 1.34527800  | -3.43019600 | -2.48196400 |
| H | 1.90458300  | -4.33428800 | -0.61549600 |
| H | -1.63043200 | -1.87758200 | -3.17575800 |
| H | 0.50532000  | -2.51636100 | -4.25190000 |

|    |             |             |             |
|----|-------------|-------------|-------------|
| H  | 2.27336000  | -3.69286500 | -2.98391000 |
| C  | -2.06772800 | -2.16437800 | -0.41414000 |
| C  | -3.41501800 | -1.61687000 | -0.61651000 |
| N  | -3.87383800 | -1.34643800 | 0.68496400  |
| C  | -2.89426000 | -1.65495100 | 1.73116300  |
| C  | -1.72224200 | -2.09215600 | 0.91019200  |
| C  | -0.39563900 | -2.40247500 | 1.31216700  |
| C  | -0.14978000 | -3.17530200 | 2.55927000  |
| S  | -5.32696400 | -0.52152100 | 1.00933900  |
| O  | -5.31345200 | -0.35980000 | 2.45635600  |
| O  | -6.40709600 | -1.23093300 | 0.34938400  |
| C  | -5.08520200 | 1.04836500  | 0.23382900  |
| C  | -4.26842400 | 1.98731500  | 0.86550000  |
| C  | -5.68696800 | 1.31217100  | -0.99125700 |
| C  | -4.05497600 | 3.20837700  | 0.24607400  |
| H  | -3.81952300 | 1.77022500  | 1.83265100  |
| C  | -5.46645000 | 2.54642300  | -1.59063900 |
| H  | -6.31333600 | 0.56154700  | -1.46492200 |
| C  | -4.65057900 | 3.50657800  | -0.98717800 |
| H  | -3.42253800 | 3.95365600  | 0.72667300  |
| H  | -5.93556200 | 2.76888000  | -2.54745400 |
| C  | -4.42621400 | 4.84083100  | -1.62480100 |
| H  | -4.97897900 | 5.62595000  | -1.09202800 |
| H  | -3.36740800 | 5.12505600  | -1.59490600 |
| H  | -4.75689700 | 4.85407700  | -2.66836400 |
| H  | -2.67034200 | -0.77757900 | 2.35054400  |
| H  | -3.25038200 | -2.45757700 | 2.39180100  |
| O  | -4.02124600 | -1.40040200 | -1.64419800 |
| Au | 1.06449100  | -0.98418300 | 0.70792100  |
| P  | 2.58537900  | 0.70065100  | 0.11156700  |

|   |             |             |             |
|---|-------------|-------------|-------------|
| H | -0.26856100 | -2.45990700 | 3.39013500  |
| H | -0.85581600 | -3.99872900 | 2.72795600  |
| H | 0.87802400  | -3.54692500 | 2.61836300  |
| H | -0.42430800 | -4.15288300 | 0.22778300  |
| C | 3.57419000  | 1.31328800  | 1.51324400  |
| C | 2.93702700  | 1.45977300  | 2.75066100  |
| C | 4.92085100  | 1.66119500  | 1.37894000  |
| C | 3.64084000  | 1.95509200  | 3.84166500  |
| H | 1.88670900  | 1.18473100  | 2.85546900  |
| C | 5.62205700  | 2.15054200  | 2.47711700  |
| H | 5.42383000  | 1.55179200  | 0.41920600  |
| C | 4.98417400  | 2.29716200  | 3.70527600  |
| H | 3.14250200  | 2.06763500  | 4.80178400  |
| H | 6.67096400  | 2.41768700  | 2.37078600  |
| H | 5.53679700  | 2.67695300  | 4.56173000  |
| C | 1.71444200  | 2.14013400  | -0.58406200 |
| C | 2.26155300  | 3.42566000  | -0.52488500 |
| C | 0.48218000  | 1.93690400  | -1.21496100 |
| C | 1.58109400  | 4.49517200  | -1.09668400 |
| H | 3.22032700  | 3.59110700  | -0.03471500 |
| C | -0.19238000 | 3.00963700  | -1.78817700 |
| H | 0.05058200  | 0.93445400  | -1.25179400 |
| C | 0.35714800  | 4.28749800  | -1.72778900 |
| H | 2.00790000  | 5.49428700  | -1.04819200 |
| H | -1.15094200 | 2.84752500  | -2.27663200 |
| H | -0.17036500 | 5.12764800  | -2.17416900 |
| C | 3.77396000  | 0.13060700  | -1.14603600 |
| C | 4.43010300  | -1.08524800 | -0.91571900 |
| C | 4.05048100  | 0.86060500  | -2.30346700 |
| C | 5.36010900  | -1.55896900 | -1.83205000 |

|   |            |             |             |
|---|------------|-------------|-------------|
| H | 4.20764000 | -1.66103400 | -0.01554500 |
| C | 4.97763700 | 0.37575300  | -3.22283200 |
| H | 3.54640400 | 1.80723100  | -2.49109900 |
| C | 5.63215300 | -0.82864300 | -2.98764300 |
| H | 5.87002400 | -2.50191400 | -1.64802400 |
| H | 5.18903600 | 0.94537000  | -4.12490100 |
| H | 6.35565700 | -1.20331600 | -3.70824200 |

**SMD-M06/6-31G(d,p)/SDD**

Electronic Energy (0K) = -2583.539469

Electronic Energy (0K) + ZPE = -2582.946403

Enthalpy (333K) = -2582.896003

Free Energy (333K) = -2583.036792

**SMD-M06/6-311++G(d,p)/SDD**

Electronic Energy (0K) = -2583.983082

**F'**

Number of imaginary frequencies: 0

|   |             |             |             |
|---|-------------|-------------|-------------|
| C | -1.11145500 | -4.40437200 | 0.44368300  |
| C | 0.20490500  | -3.95379000 | -0.06909900 |
| C | 1.14885000  | -3.40790600 | 0.96703300  |
| C | 0.96429300  | -3.73702400 | 2.33816000  |
| C | -0.21704500 | -4.30411700 | 2.71134900  |
| C | -1.27374600 | -4.59873900 | 1.76815700  |
| H | -1.89113600 | -4.66278100 | -0.27126500 |
| H | 1.71095100  | -3.44829000 | 3.07343300  |
| H | -0.39928700 | -4.51001800 | 3.76400400  |
| H | -2.21116600 | -4.99382900 | 2.15209400  |
| C | 1.97510800  | -2.52309600 | 0.32332100  |
| C | 3.07633800  | -1.61122300 | 0.61211300  |
| N | 3.37652200  | -1.02550100 | -0.64422700 |

|    |             |             |             |
|----|-------------|-------------|-------------|
| C  | 2.54127800  | -1.50066600 | -1.76726800 |
| C  | 1.54099100  | -2.34181700 | -1.03676700 |
| C  | 0.40535400  | -3.09218800 | -1.31389800 |
| C  | -0.16857600 | -3.43762000 | -2.64770600 |
| S  | 4.44219600  | 0.28023100  | -0.84003400 |
| O  | 4.45071500  | 0.50887500  | -2.27852600 |
| O  | 5.67094500  | -0.01437300 | -0.12736600 |
| C  | 3.60140800  | 1.62150000  | -0.04792500 |
| C  | 2.63242300  | 2.31762800  | -0.76997600 |
| C  | 3.90770800  | 1.95645400  | 1.26813800  |
| C  | 1.96685500  | 3.36987600  | -0.15661000 |
| H  | 2.43013000  | 2.06504200  | -1.80916000 |
| C  | 3.23350200  | 3.01669800  | 1.86080300  |
| H  | 4.66794100  | 1.40120100  | 1.81060500  |
| C  | 2.25992200  | 3.73846000  | 1.16229800  |
| H  | 1.21702700  | 3.93096200  | -0.71516500 |
| H  | 3.47439200  | 3.29894200  | 2.88454400  |
| C  | 1.53446800  | 4.87248300  | 1.81486400  |
| H  | 1.24051000  | 5.63648200  | 1.08638400  |
| H  | 0.61574900  | 4.52198900  | 2.30490100  |
| H  | 2.14646400  | 5.35135300  | 2.58704500  |
| H  | 2.09928500  | -0.66506000 | -2.32231500 |
| H  | 3.13812800  | -2.09939300 | -2.46779800 |
| O  | 3.61719600  | -1.33726300 | 1.66299700  |
| Au | -0.44467800 | -0.97573600 | -0.70532000 |
| P  | -1.89658700 | 0.73453600  | -0.06954400 |
| H  | 0.11760000  | -2.69614800 | -3.40266900 |
| H  | 0.19782000  | -4.41678900 | -2.98714800 |
| H  | -1.26377300 | -3.49061300 | -2.62055400 |
| H  | 0.69270500  | -4.90151200 | -0.40276000 |



|   |             |             |             |
|---|-------------|-------------|-------------|
| C | -3.62829800 | 0.26654500  | -0.38192600 |
| C | -4.06744900 | -0.97493200 | 0.09476100  |
| C | -4.51195500 | 1.10202000  | -1.06748200 |
| C | -5.38188100 | -1.37233200 | -0.11077600 |
| H | -3.37885600 | -1.62474300 | 0.63676800  |
| C | -5.82706300 | 0.69316600  | -1.27665600 |
| H | -4.18114700 | 2.07064500  | -1.43829200 |
| C | -6.26109000 | -0.53905000 | -0.80068000 |
| H | -5.72107200 | -2.33524700 | 0.26401200  |
| H | -6.51329000 | 1.34485500  | -1.81246400 |
| H | -7.28877200 | -0.85387200 | -0.96719900 |
| C | -1.59941300 | 2.28991600  | -0.95962600 |
| C | -1.78043700 | 3.53188000  | -0.34549500 |
| C | -1.22394300 | 2.22321900  | -2.30630300 |
| C | -1.58326400 | 4.69929800  | -1.07752100 |
| H | -2.07283200 | 3.59178400  | 0.70185800  |
| C | -1.03070800 | 3.39272900  | -3.03228600 |
| H | -1.08240700 | 1.25211700  | -2.78301300 |
| C | -1.20874200 | 4.63029800  | -2.41689600 |
| H | -1.72154700 | 5.66550500  | -0.59743600 |
| H | -0.73709900 | 3.33894500  | -4.07797900 |
| H | -1.05245500 | 5.54519800  | -2.98385300 |
| C | -1.75795900 | 1.07088200  | 1.71197800  |
| C | -2.85612900 | 1.51799400  | 2.45334700  |
| C | -0.51869700 | 0.89685700  | 2.33771900  |
| C | -2.70955800 | 1.79109500  | 3.80916200  |
| H | -3.82419100 | 1.65456600  | 1.97298500  |
| C | -0.37742900 | 1.17580900  | 3.69239000  |
| H | 0.33932200  | 0.54869000  | 1.75923300  |
| C | -1.47361500 | 1.61993800  | 4.42738000  |

|   |             |            |            |
|---|-------------|------------|------------|
| H | -3.56520300 | 2.13659200 | 4.38461300 |
| H | 0.58837300  | 1.03990300 | 4.17372600 |
| H | -1.36512000 | 1.83031200 | 5.48901600 |

**SMD-M06/6-31G(d,p)/SDD**

Electronic Energy (0K) = -2583.571203

Electronic Energy (0K) + ZPE = -2582.975991

Enthalpy (333K) = -2582.925693

Free Energy (333K) = -2583.064300

**SMD-M06/6-311++G(d,p)/SDD**

Electronic Energy (0K) = -2584.016041

**4a**

Number of imaginary frequencies: 0

|   |             |             |             |
|---|-------------|-------------|-------------|
| C | 5.07187900  | 0.81278700  | 0.82849900  |
| C | 3.80672500  | 0.28150900  | 0.63954200  |
| C | 2.91802300  | 0.87843600  | -0.28108600 |
| C | 3.28615800  | 2.00507600  | -1.00663600 |
| C | 4.56138100  | 2.53255200  | -0.80627300 |
| C | 5.44418000  | 1.94467600  | 0.09831500  |
| H | 5.76739600  | 0.36046800  | 1.53465700  |
| H | 2.59717800  | 2.46118500  | -1.71419700 |
| H | 4.87156500  | 3.41358400  | -1.36448100 |
| H | 6.43529100  | 2.37176500  | 0.23718200  |
| C | 1.70155200  | 0.07844600  | -0.24886900 |
| C | 0.38861700  | 0.03537100  | -0.89658500 |
| N | -0.22265900 | -1.11107000 | -0.33688100 |
| C | 0.61414000  | -1.78628000 | 0.66638500  |
| C | 1.82648900  | -0.93325600 | 0.63072800  |
| C | 3.16916000  | -0.93426500 | 1.29136900  |
| C | 3.94900600  | -2.23050900 | 1.07478200  |

|   |             |             |             |
|---|-------------|-------------|-------------|
| S | -1.78033700 | -1.63705400 | -0.72773900 |
| O | -1.97054700 | -2.82348200 | 0.09712500  |
| O | -1.89220600 | -1.71943300 | -2.17391700 |
| C | -2.83240200 | -0.34308800 | -0.13598300 |
| C | -3.21171900 | -0.34772400 | 1.20644200  |
| C | -3.25356800 | 0.65607900  | -1.00680600 |
| C | -4.02677700 | 0.67090600  | 1.67353600  |
| H | -2.88526900 | -1.14631800 | 1.86897700  |
| C | -4.07229500 | 1.66719600  | -0.51814000 |
| H | -2.94076300 | 0.63950300  | -2.04680800 |
| C | -4.46783900 | 1.69189000  | 0.82139200  |
| H | -4.33608400 | 0.67811700  | 2.71790100  |
| H | -4.41192900 | 2.45339600  | -1.19032700 |
| C | -5.34912900 | 2.77905700  | 1.35066100  |
| H | -6.28382400 | 2.36898400  | 1.75394800  |
| H | -4.86118200 | 3.31824900  | 2.17258300  |
| H | -5.60747700 | 3.50772400  | 0.57557200  |
| H | 0.12373400  | -1.79812300 | 1.64930600  |
| H | 0.81364100  | -2.82738400 | 0.37888500  |
| O | -0.12318500 | 0.77635500  | -1.71016500 |
| H | 4.06984000  | -2.43806700 | 0.00454800  |
| H | 4.94669100  | -2.16298500 | 1.52275300  |
| H | 3.43424400  | -3.08225700 | 1.53467900  |
| H | 3.05697400  | -0.76816300 | 2.37483100  |

**SMD-M06/6-31G(d,p)/SDD**

Electronic Energy (0K) = -1412.166716

Electronic Energy (0K) + ZPE = -1411.846417

Enthalpy (333K) = -1411.819599

Free Energy (333K) = -1411.907369

**SMD-M06/6-311++G(d,p)/SDD**

Electronic Energy (0K) = -1412.435738
